# Supplementary material for: Synthesis of 1-substituted 1,2,3,4-tetrahydrobenz[g]isoquinoline-5,10-diones
Source: Royal Society of Chemistry journal article supplement (doi:10.1039/c0ob00391c), 2010-09-17

## SUPPORTING INFORMATION

### Synthesis of 1-substituted 1,2,3,4-tetrahydrobenz[*g*]isoquinoline-5,10-diones

Ekaterina Shinkevich,<sup>a</sup> Jurgen Deblander,<sup>a</sup> Sandra Matthijs,<sup>b</sup> Jan Jacobs,<sup>c</sup> Norbert De Kimpe,<sup>c</sup>  
Kourosch Abbaspour Tehrani<sup>\*a,d</sup>

<sup>a</sup> *Laboratory of Organic Chemistry, Department of Applied Biological Sciences and Engineering, Faculty of Science and Bio-engineering Sciences, Vrije Universiteit Brussel, Pleinlaan 2, B-1050 Brussels, Belgium*

<sup>b</sup> *Institut en Recherches Microbiologiques – Wiame, Campus du CERIA, 1 avenue Emile Gryson, bât 4B, B-1070 Brussels, Belgium*

<sup>c</sup> *Department of Organic Chemistry, Faculty of Bioscience Engineering, Ghent University, Coupure Links 653, B-9000 Ghent, Belgium*

<sup>d</sup> *Organic Synthesis, Faculty of Sciences, University of Antwerp, Groenenborgerlaan 171, B-2020 Antwerp, Belgium*

[Kourosch.Abbaspourtehrani@ua.ac.be](mailto:Kourosch.Abbaspourtehrani@ua.ac.be)

## CONTENTS

|                                                                  |     |
|------------------------------------------------------------------|-----|
| <sup>1</sup> H NMR and <sup>13</sup> C NMR spectra of <b>9</b>   | S3  |
| <sup>1</sup> H NMR and <sup>13</sup> C NMR spectra of <b>7a</b>  | S4  |
| <sup>1</sup> H NMR and <sup>13</sup> C NMR spectra of <b>7b</b>  | S5  |
| <sup>1</sup> H NMR and <sup>13</sup> C NMR spectra of <b>7c</b>  | S6  |
| <sup>1</sup> H NMR and <sup>13</sup> C NMR spectra of <b>7d</b>  | S7  |
| <sup>1</sup> H NMR and <sup>13</sup> C NMR spectra of <b>10</b>  | S8  |
| <sup>1</sup> H NMR and <sup>13</sup> C NMR spectra of <b>12a</b> | S9  |
| <sup>1</sup> H NMR and <sup>13</sup> C NMR spectra of <b>13a</b> | S10 |
| UPLC of <b>13a</b>                                               | S11 |
| <sup>1</sup> H NMR spectra of <b>14</b> at 297 K and 323 K       | S12 |
| <sup>13</sup> C NMR spectra of <b>14</b> at 298 K and 323 K      | S13 |
| UPLC of <b>14</b>                                                | S11 |
| <sup>1</sup> H NMR and <sup>13</sup> C NMR spectra of <b>15</b>  | S14 |
| <sup>1</sup> H NMR spectrum of <b>16</b>                         | S16 |
| <sup>1</sup> H NMR and <sup>13</sup> C NMR spectra of <b>21</b>  | S17 |
| UPLC of <b>21</b>                                                | S18 |
| <sup>1</sup> H NMR and <sup>13</sup> C NMR spectra of <b>22</b>  | S19 |

|                                                                                                       |     |
|-------------------------------------------------------------------------------------------------------|-----|
| UPLC of <b>22</b>                                                                                     | S20 |
| <sup>1</sup> H NMR and <sup>13</sup> C NMR spectra of <b>12b</b>                                      | S21 |
| <sup>1</sup> H NMR and <sup>13</sup> C NMR spectra of <b>12c</b>                                      | S22 |
| UPLC of <b>12c</b>                                                                                    | S23 |
| <sup>1</sup> H NMR and <sup>13</sup> C NMR spectra of <b>12d</b>                                      | S24 |
| <sup>1</sup> H NMR and <sup>13</sup> C NMR spectra of <b>12e</b>                                      | S25 |
| <sup>1</sup> H NMR and <sup>13</sup> C NMR spectra of <b>23a</b>                                      | S26 |
| UPLC of <b>23a</b>                                                                                    | S27 |
| <sup>1</sup> H NMR and <sup>13</sup> C NMR spectra of <b>23b</b>                                      | S28 |
| UPLC of <b>23b</b>                                                                                    | S29 |
| <sup>1</sup> H NMR and <sup>13</sup> C NMR spectra of <b>23c</b>                                      | S30 |
| <sup>1</sup> H NMR spectrum of <b>24b</b> , <sup>13</sup> C NMR spectrum of <b>25</b>                 | S31 |
| <sup>1</sup> H NMR spectra of <b>25</b> at 295 K and 323 K                                            | S32 |
| UPLC of <b>25</b>                                                                                     | S33 |
| <sup>1</sup> H NMR spectra of <b>26</b> at 298 K and 323 K                                            | S34 |
| <sup>1</sup> H NMR spectrum of <b>26</b> at 243 K, <sup>13</sup> C NMR spectrum of <b>26</b> at 298 K | S35 |
| UPLC of <b>26</b>                                                                                     | S36 |
| <sup>1</sup> H NMR and <sup>13</sup> C NMR spectra of <b>27</b>                                       | S37 |
| <sup>1</sup> H NMR and <sup>13</sup> C NMR spectra of <b>31</b>                                       | S38 |
| <sup>1</sup> H NMR and <sup>13</sup> C NMR spectra of <b>32</b>                                       | S39 |

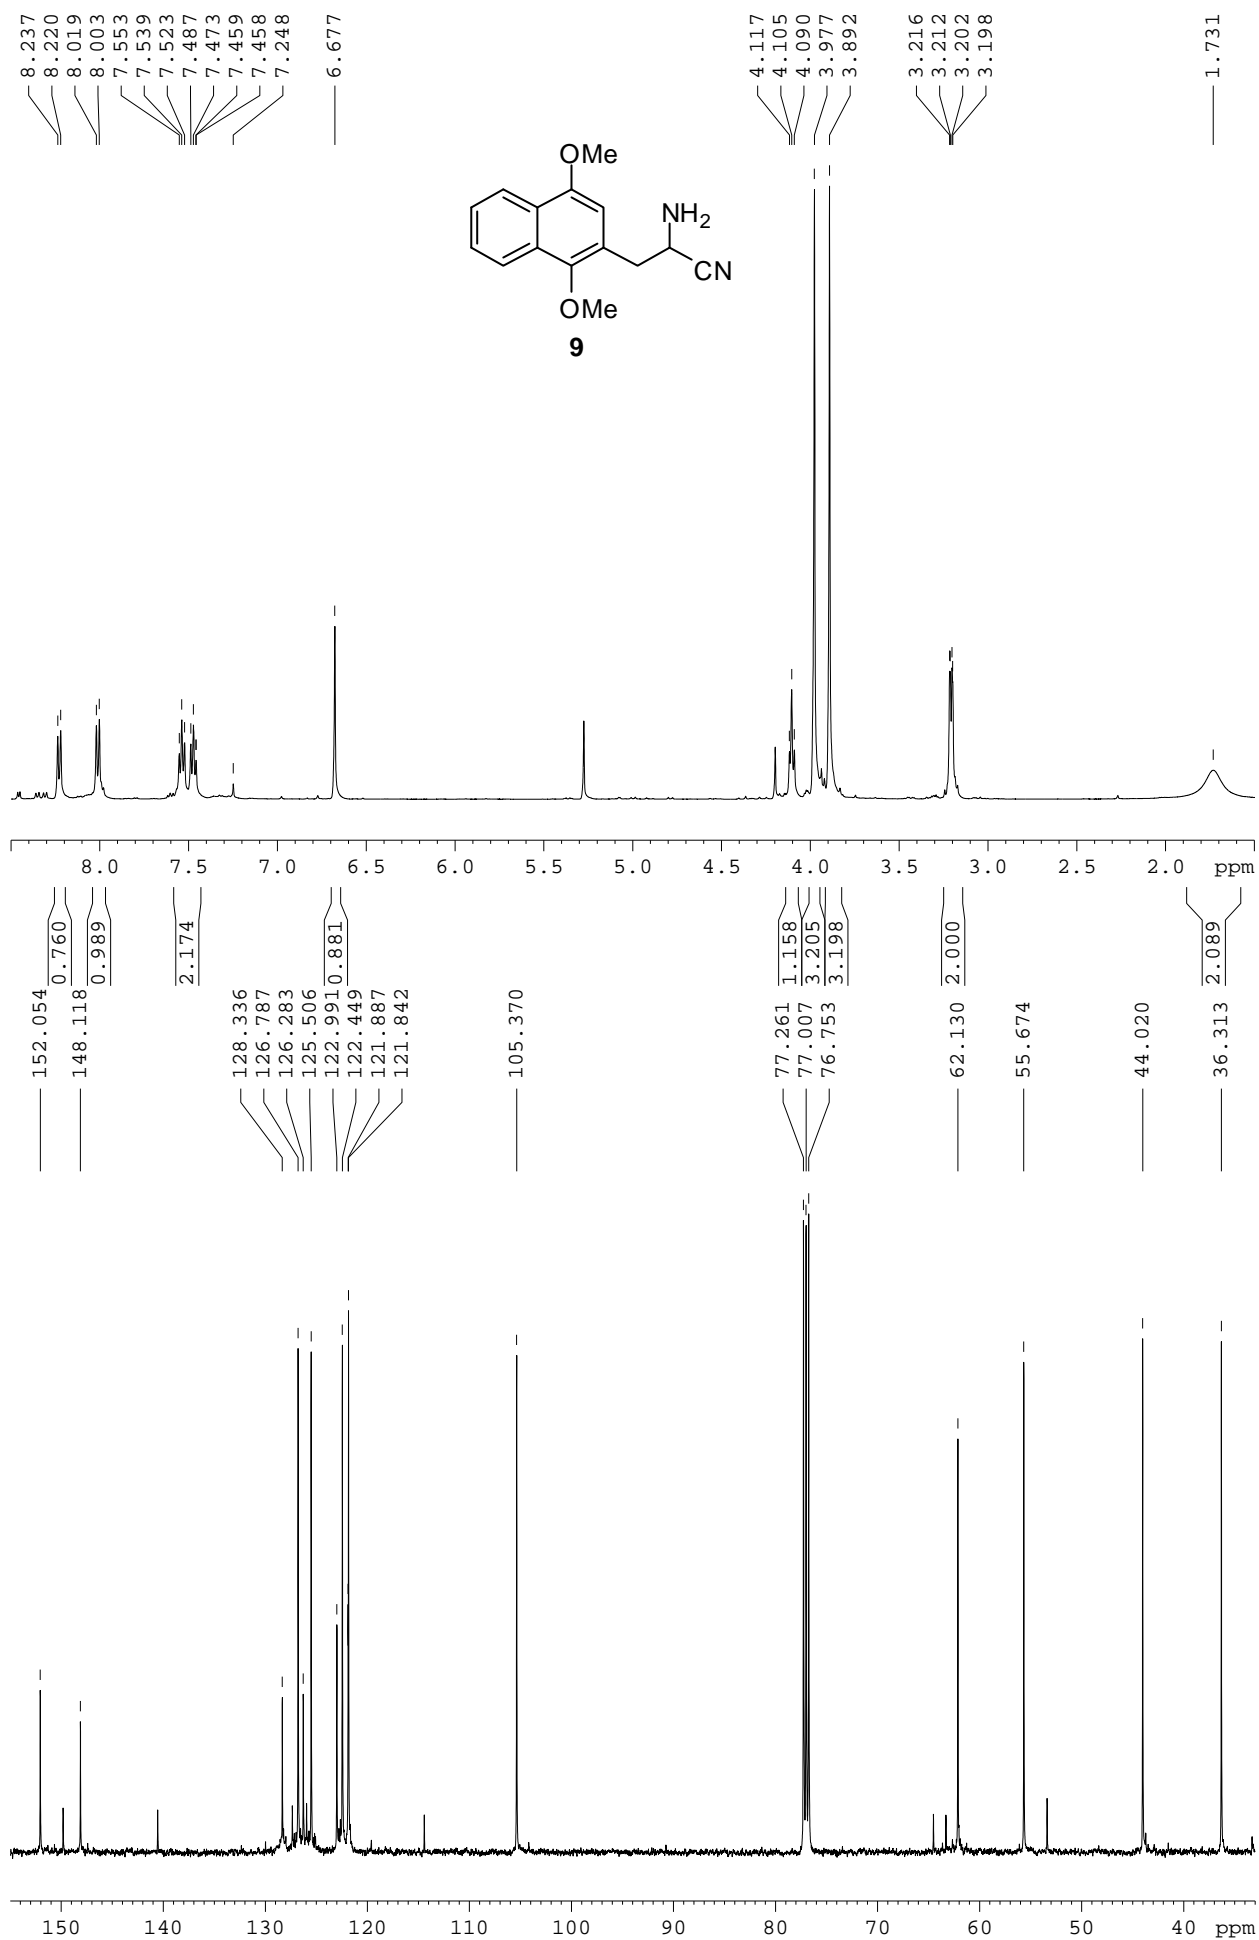

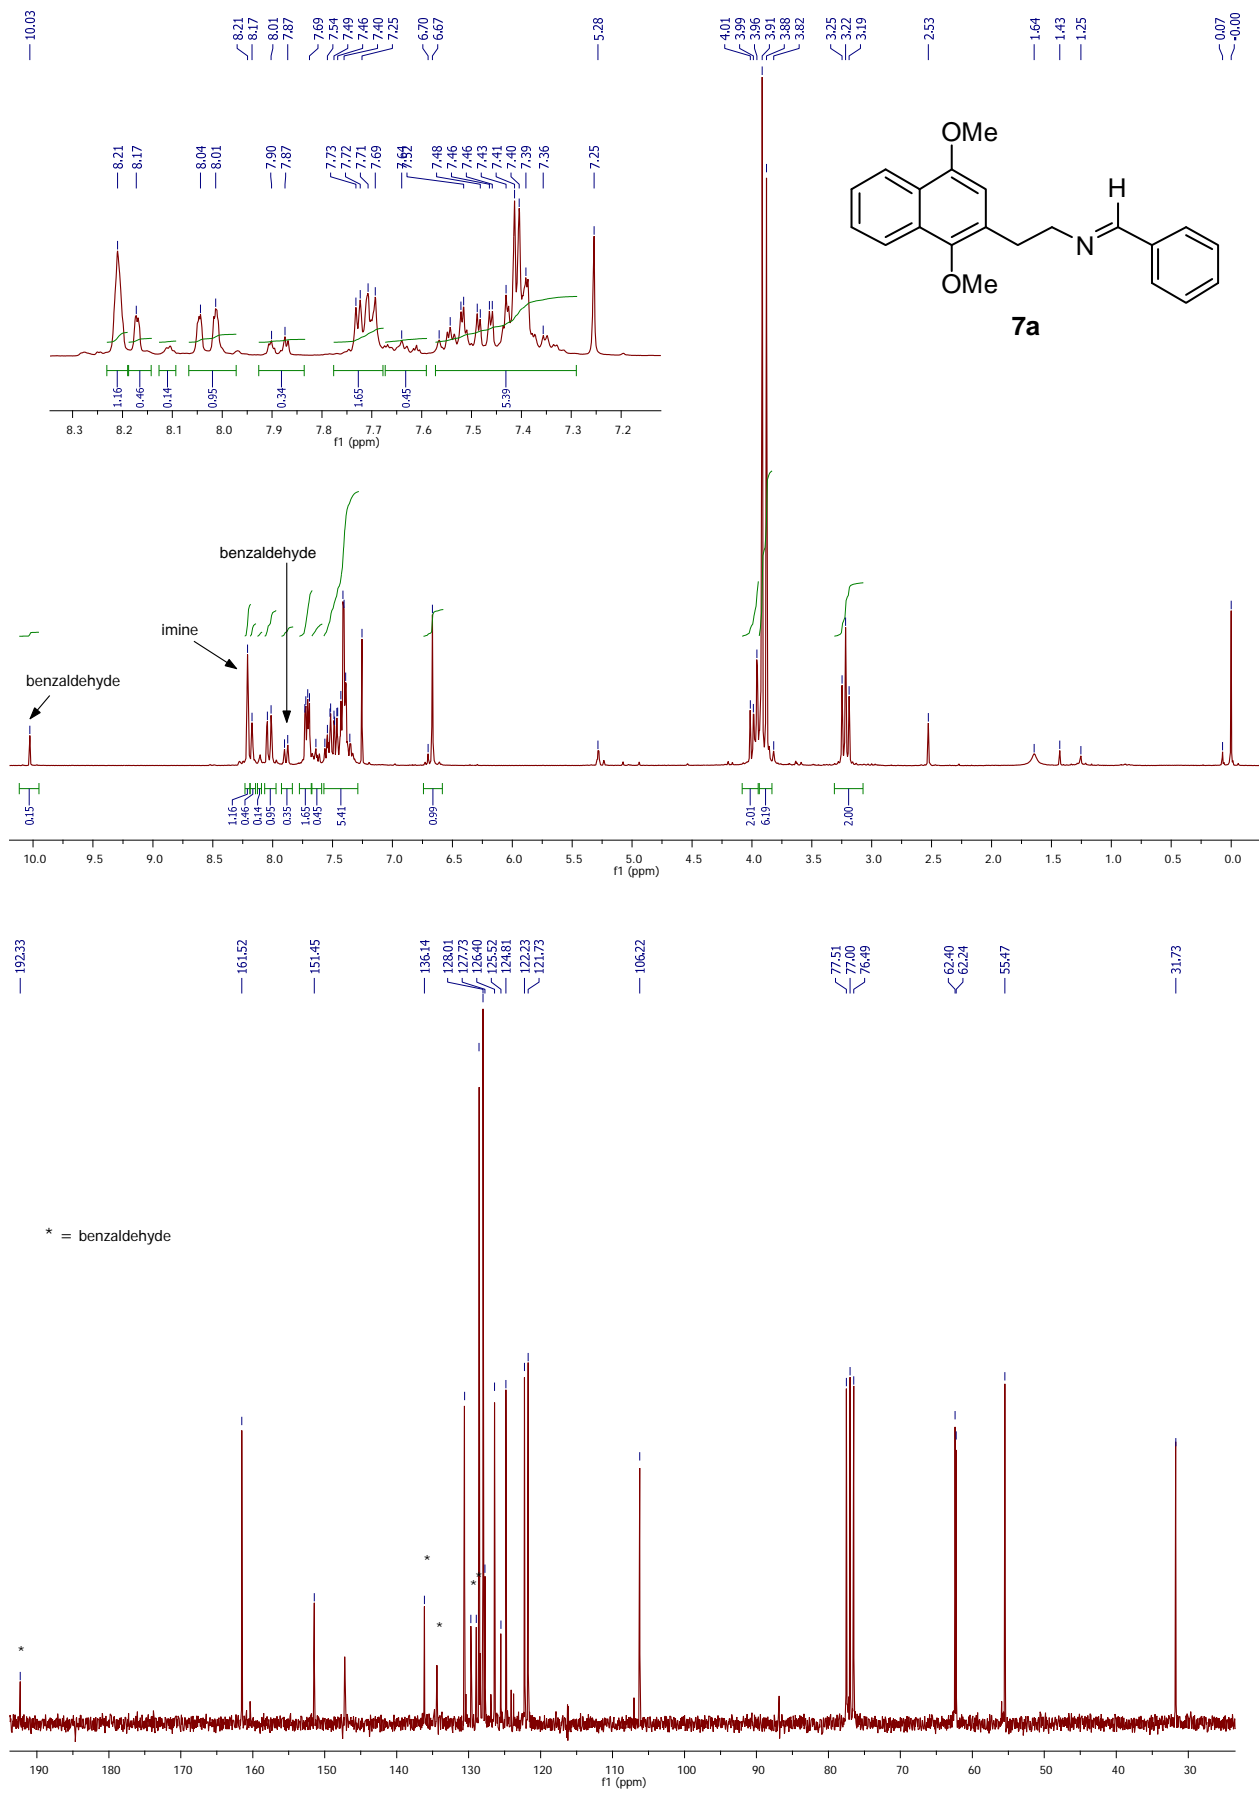

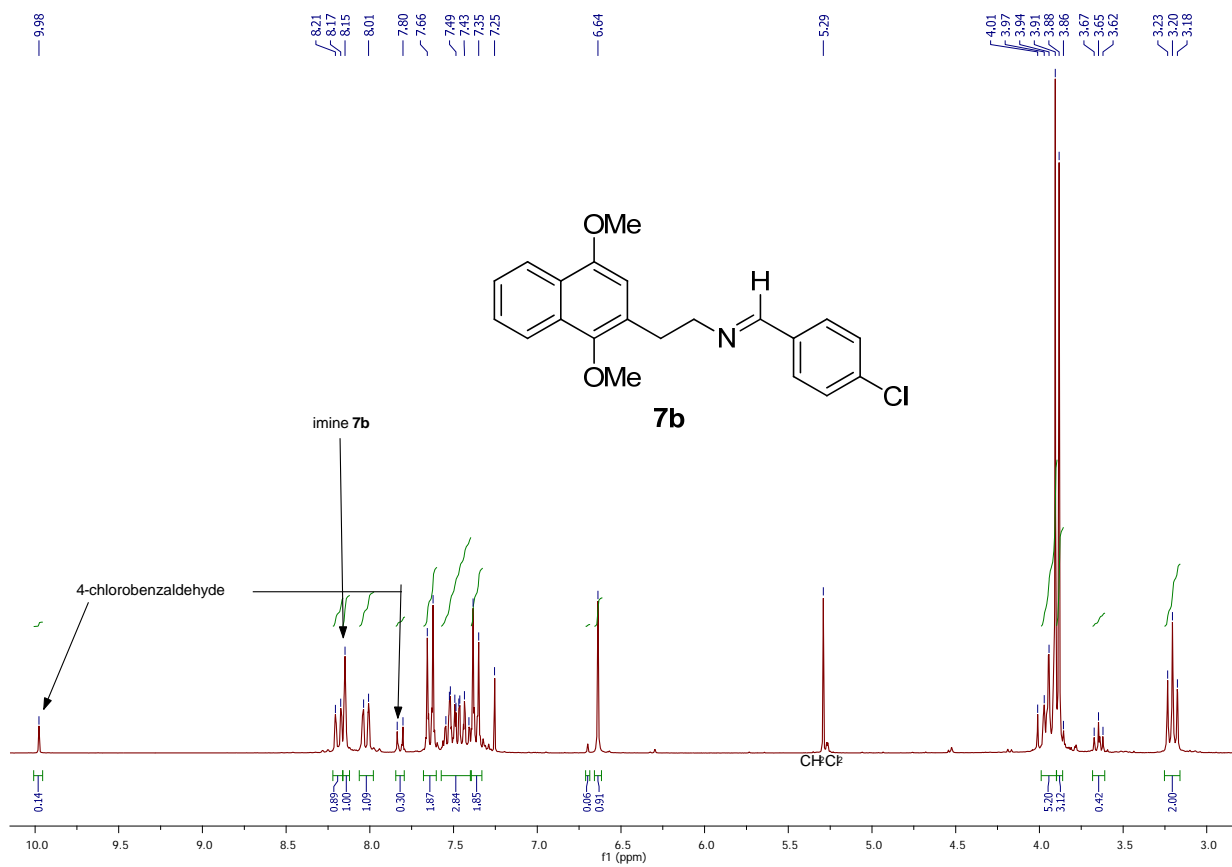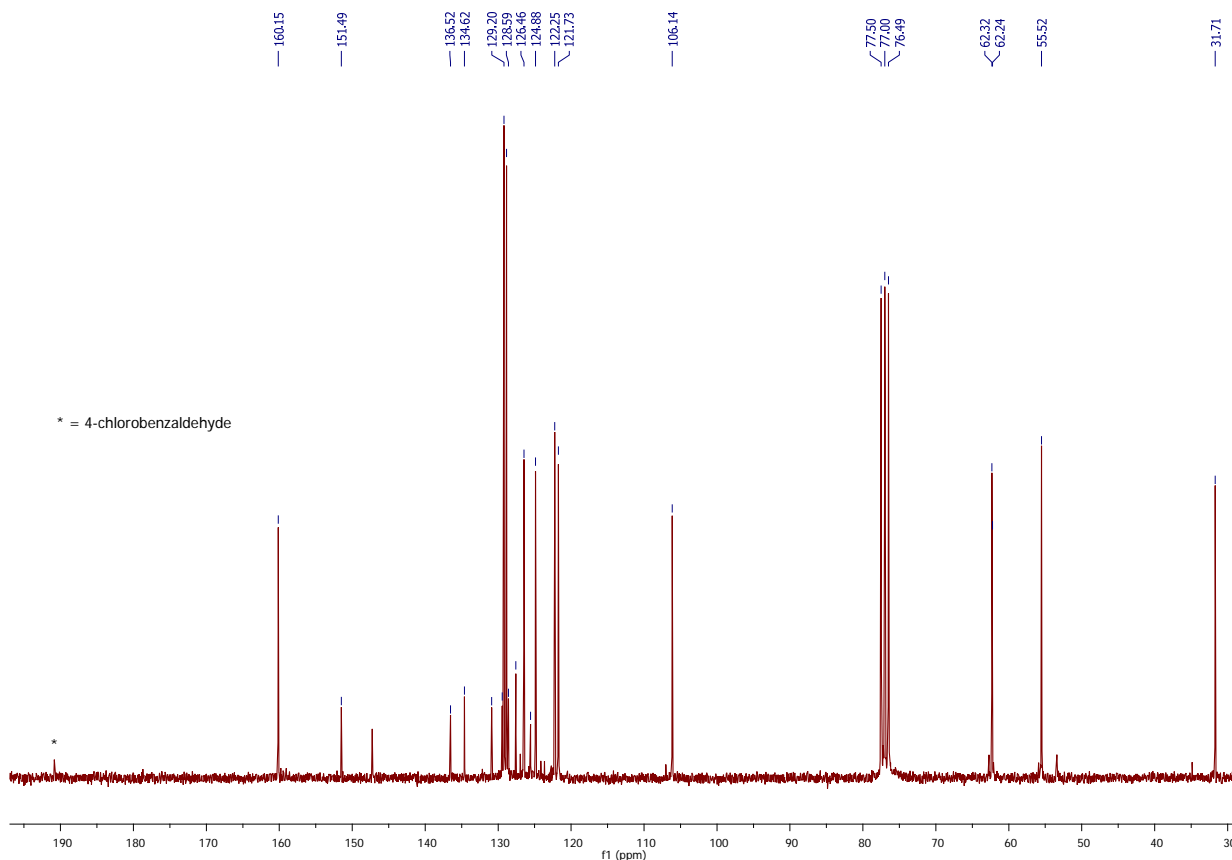

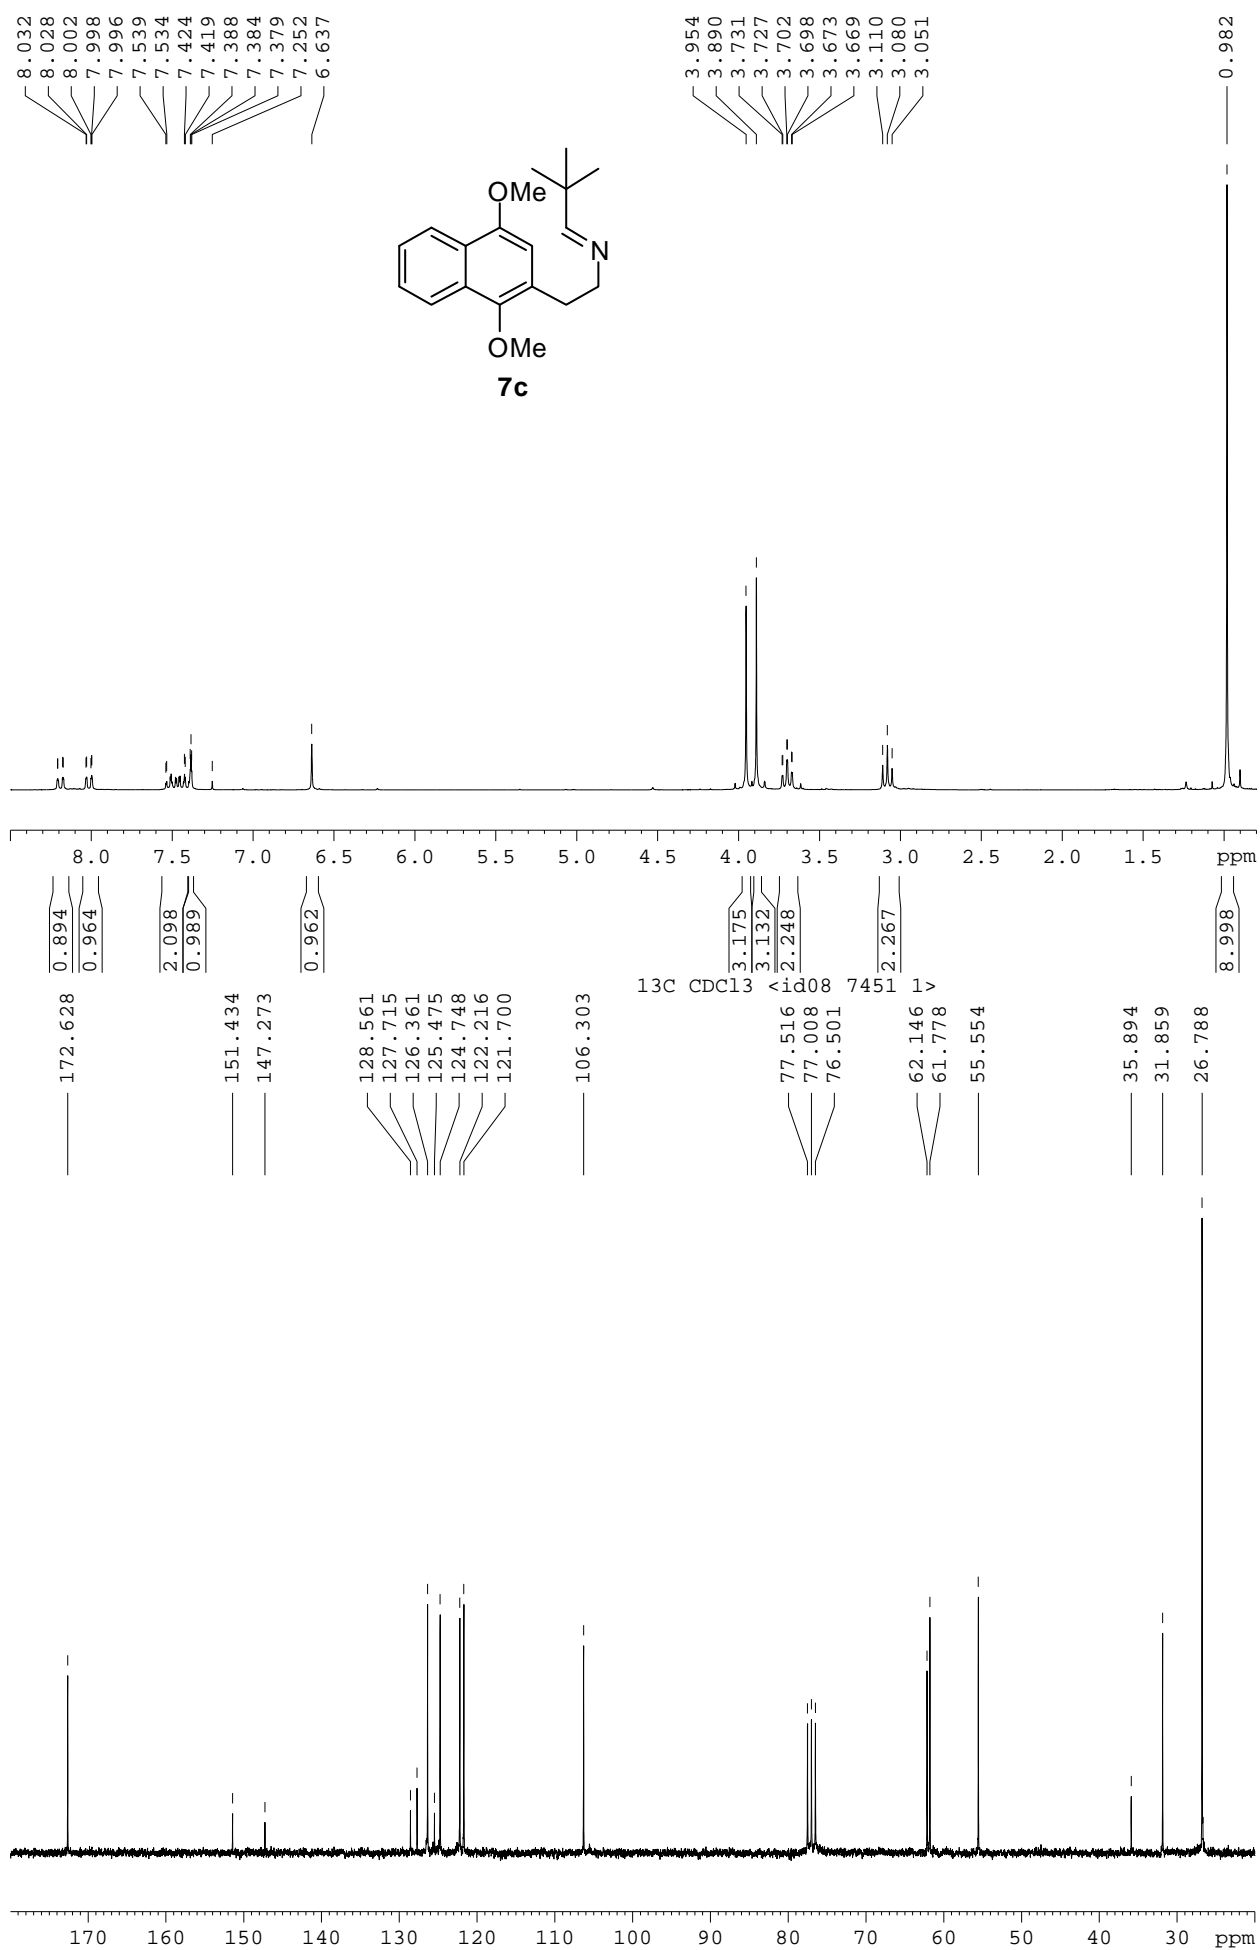

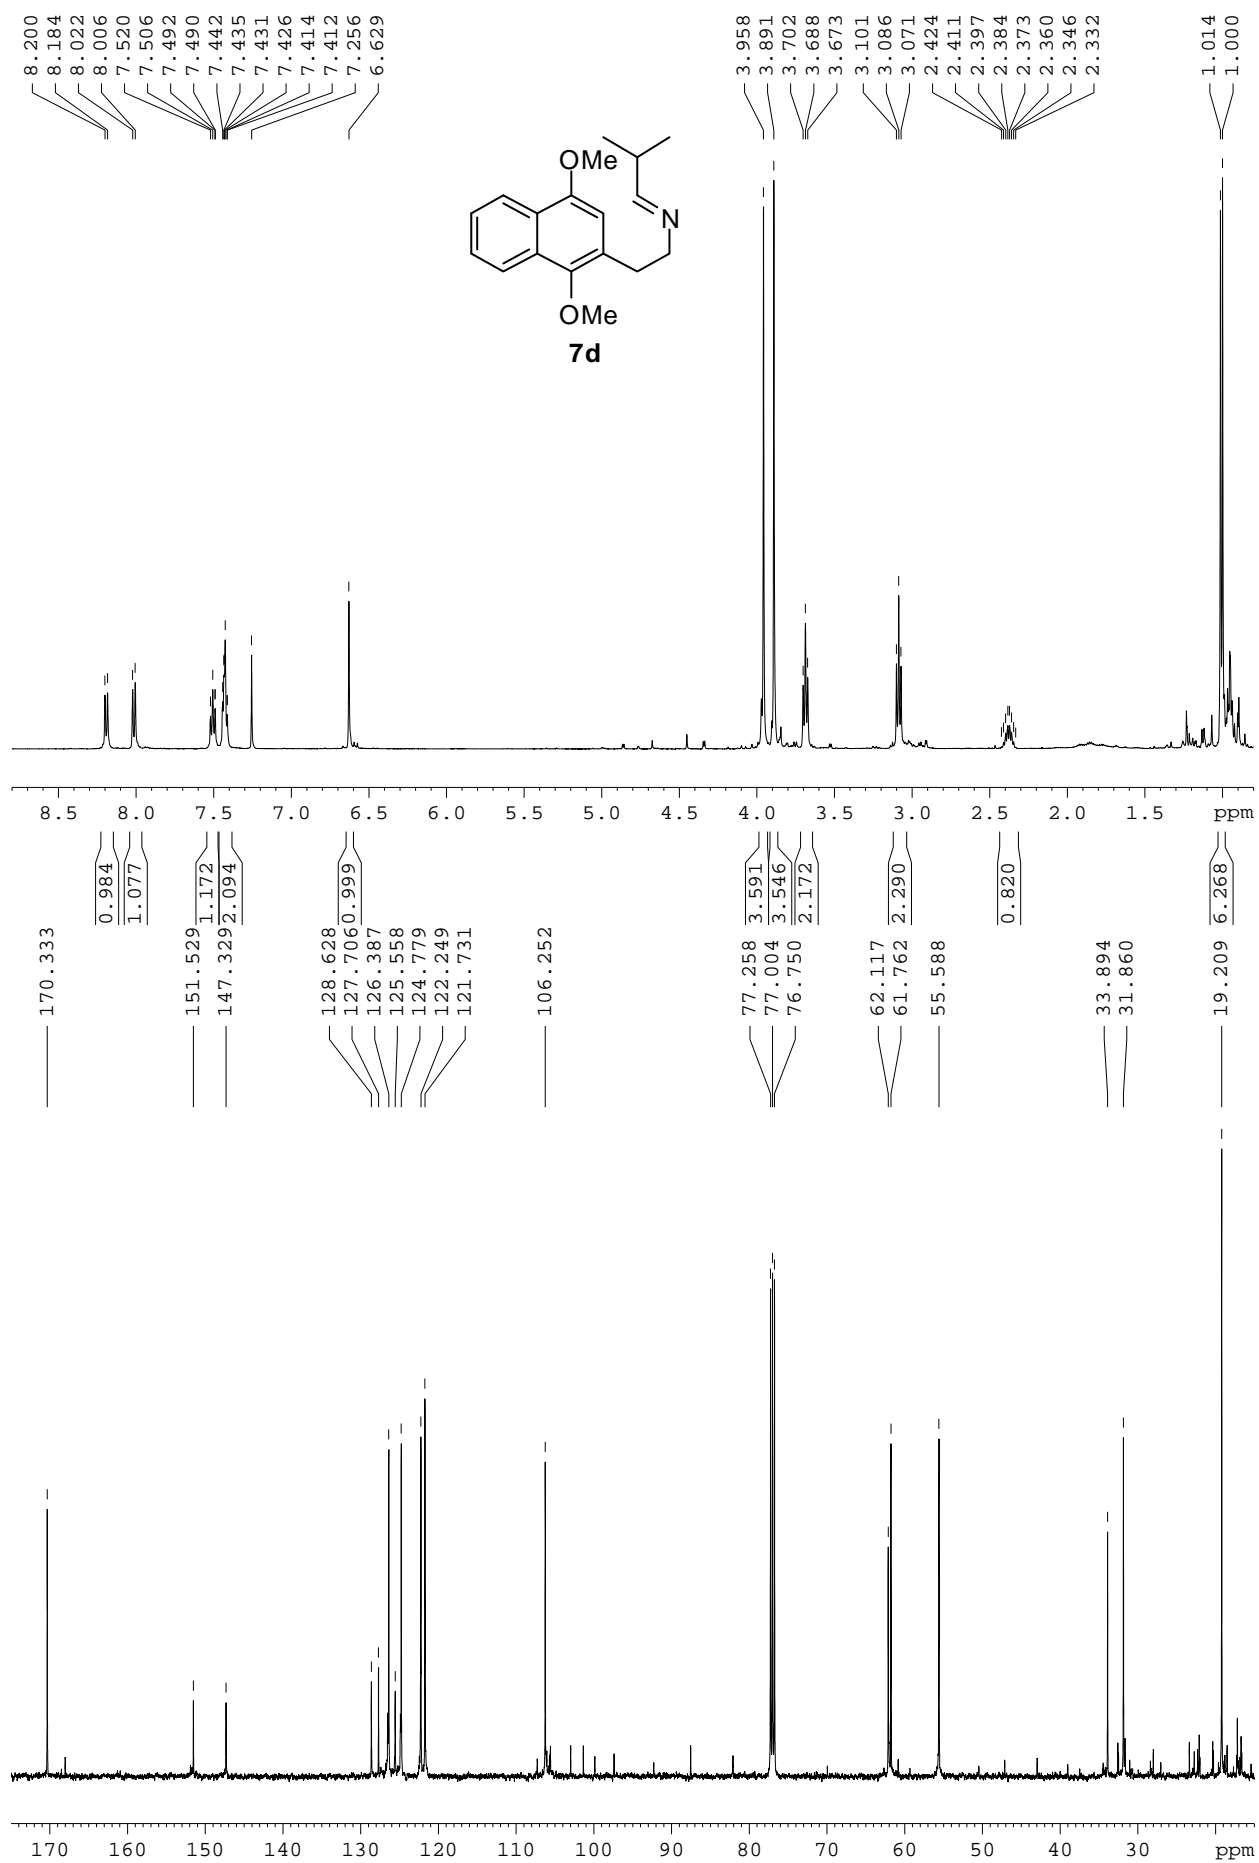

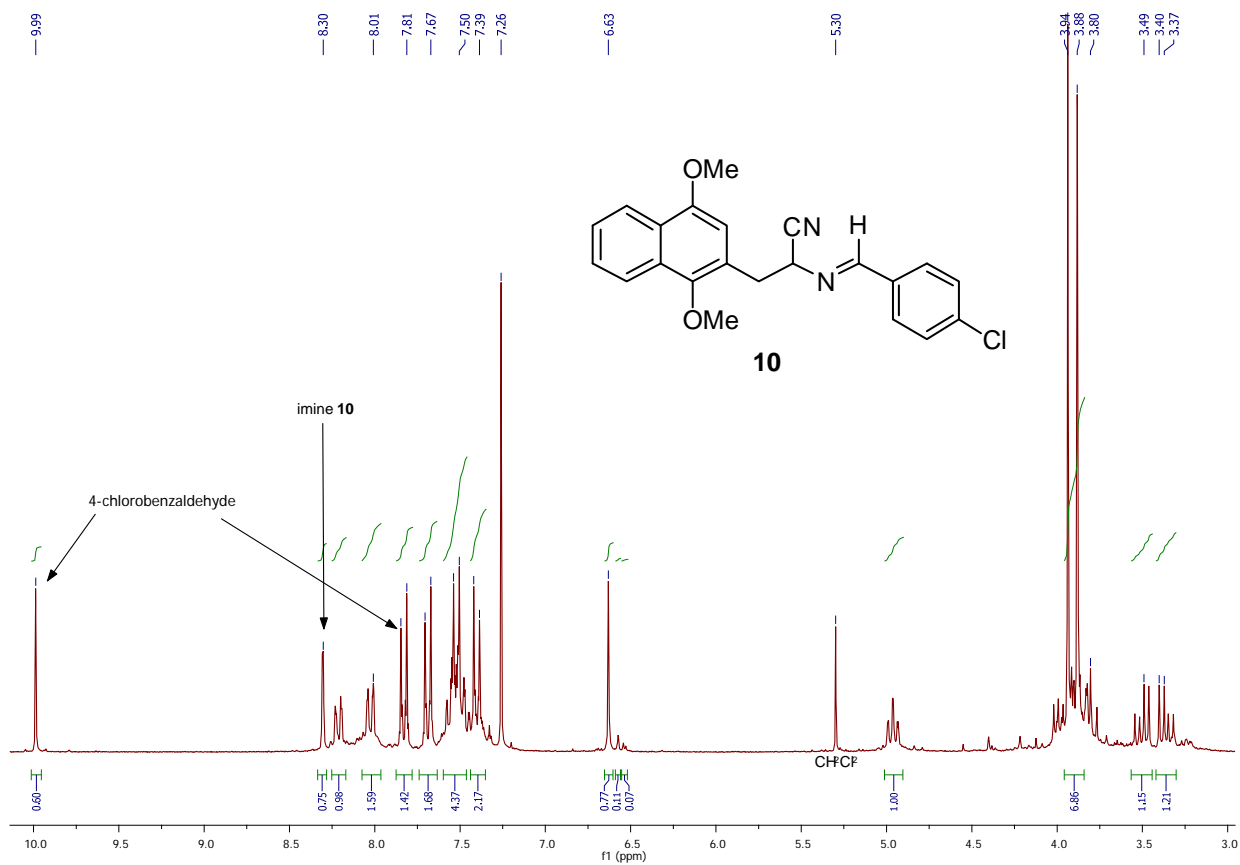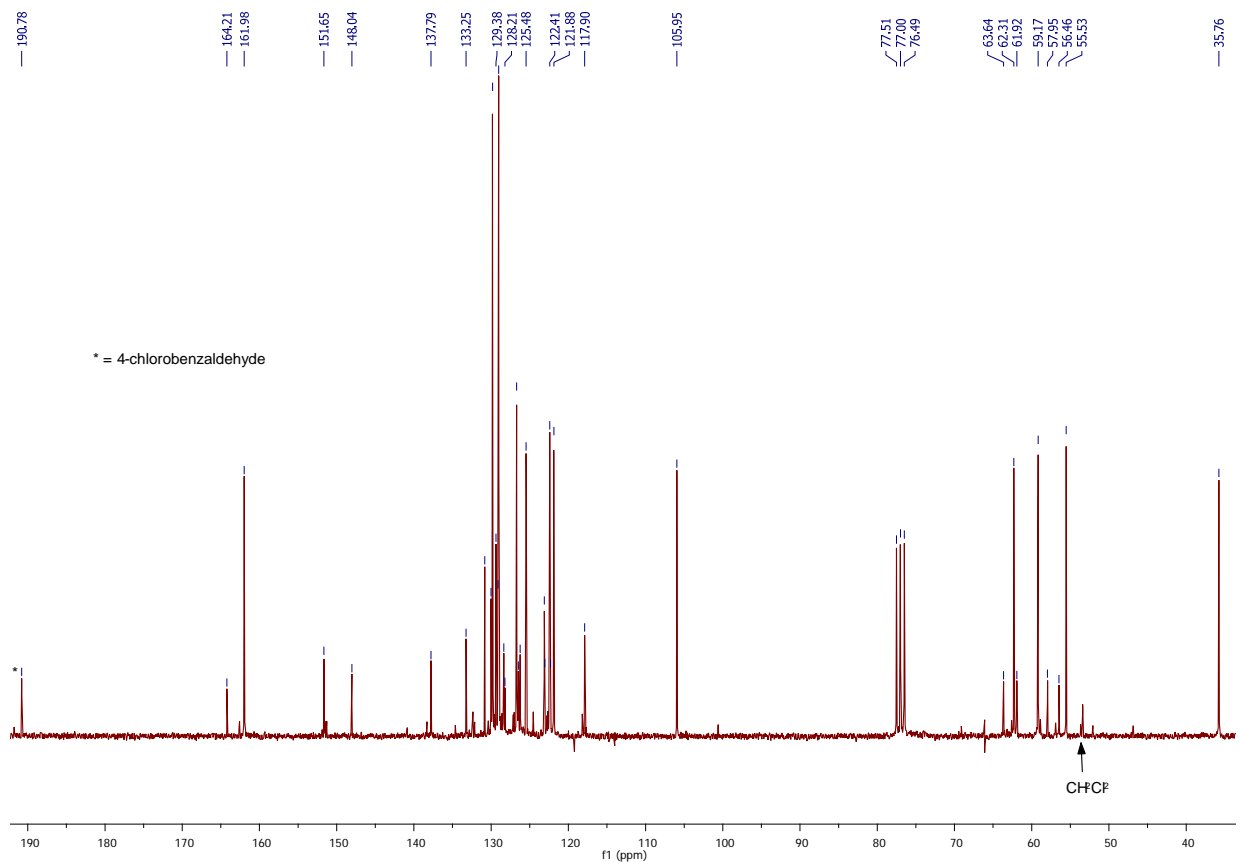



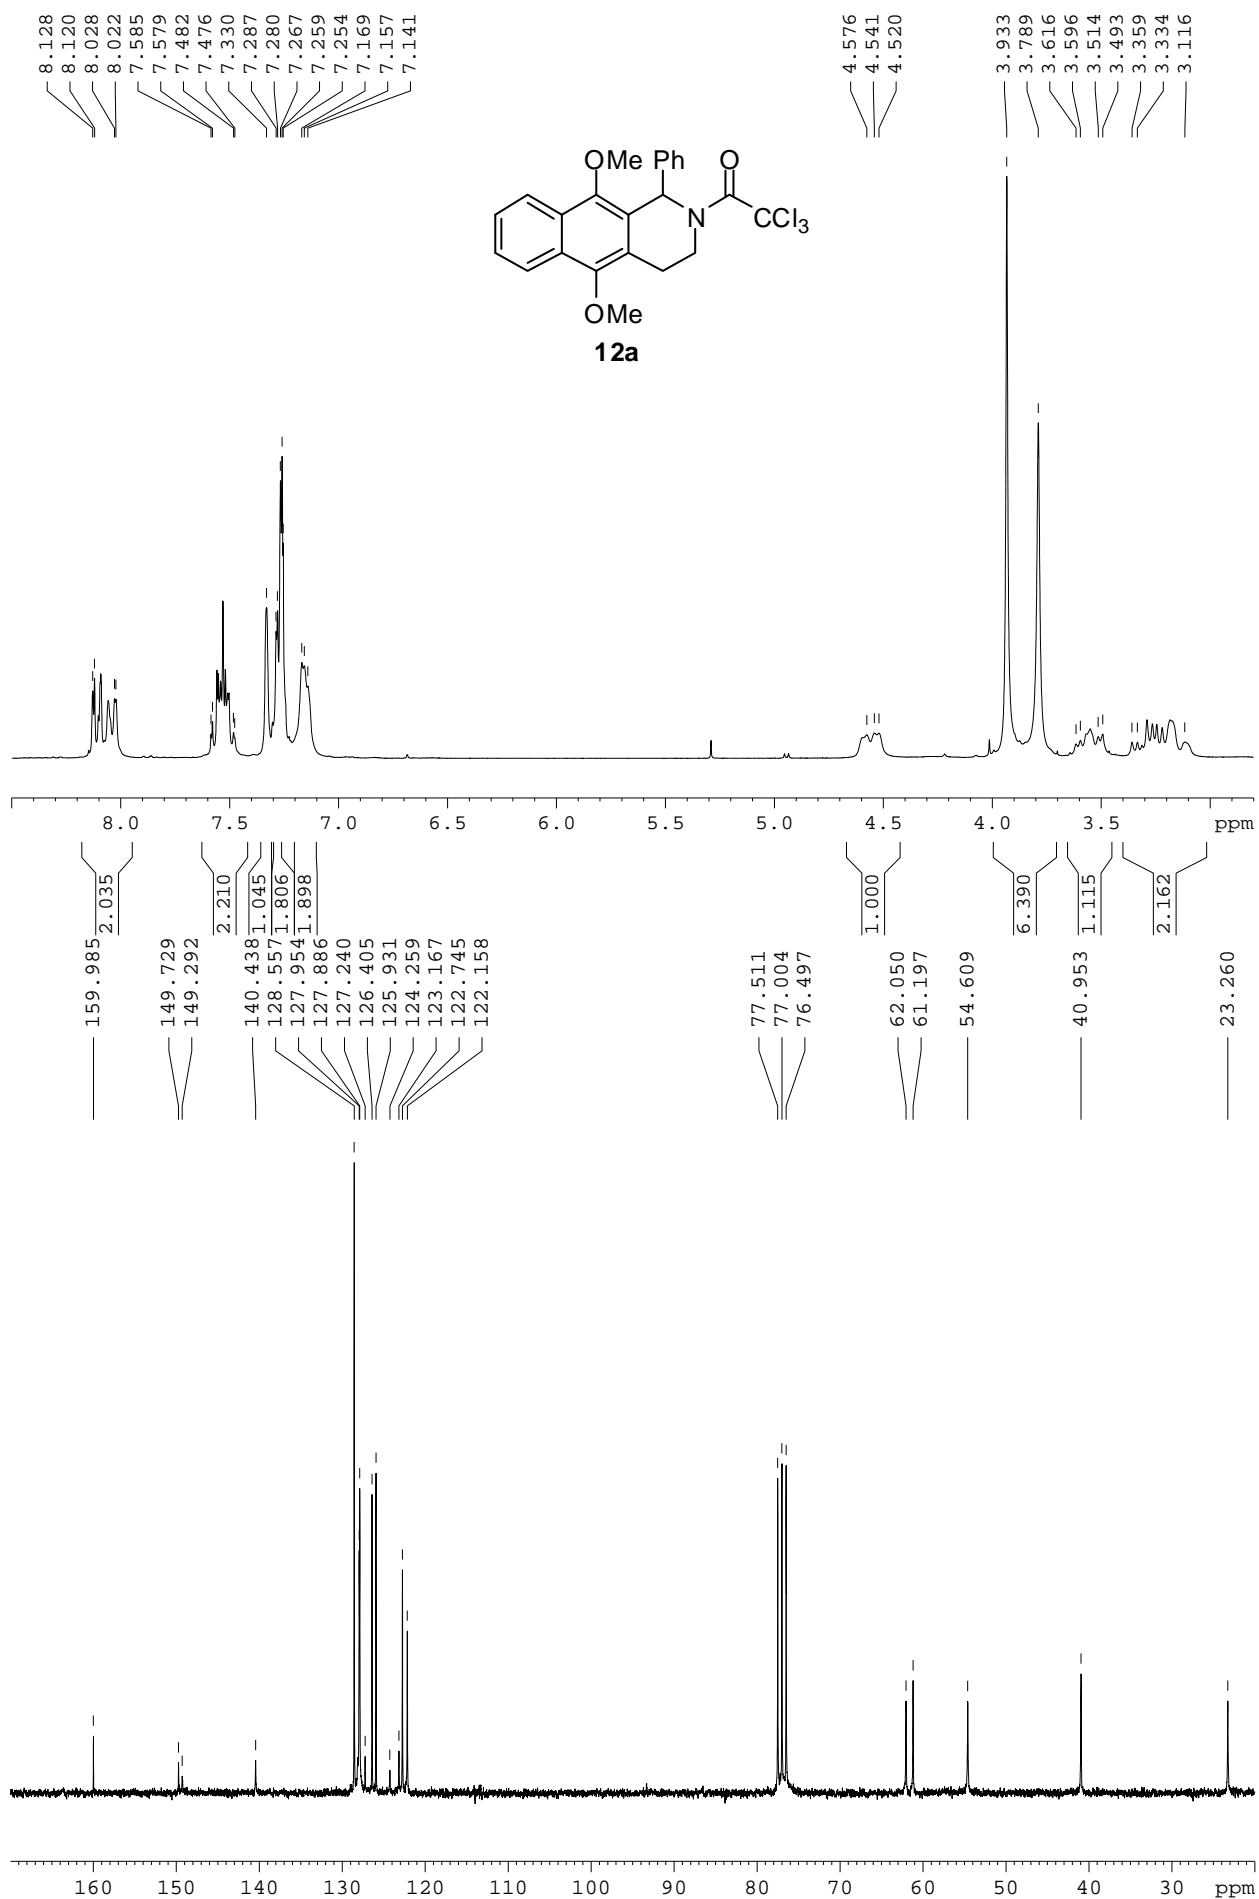

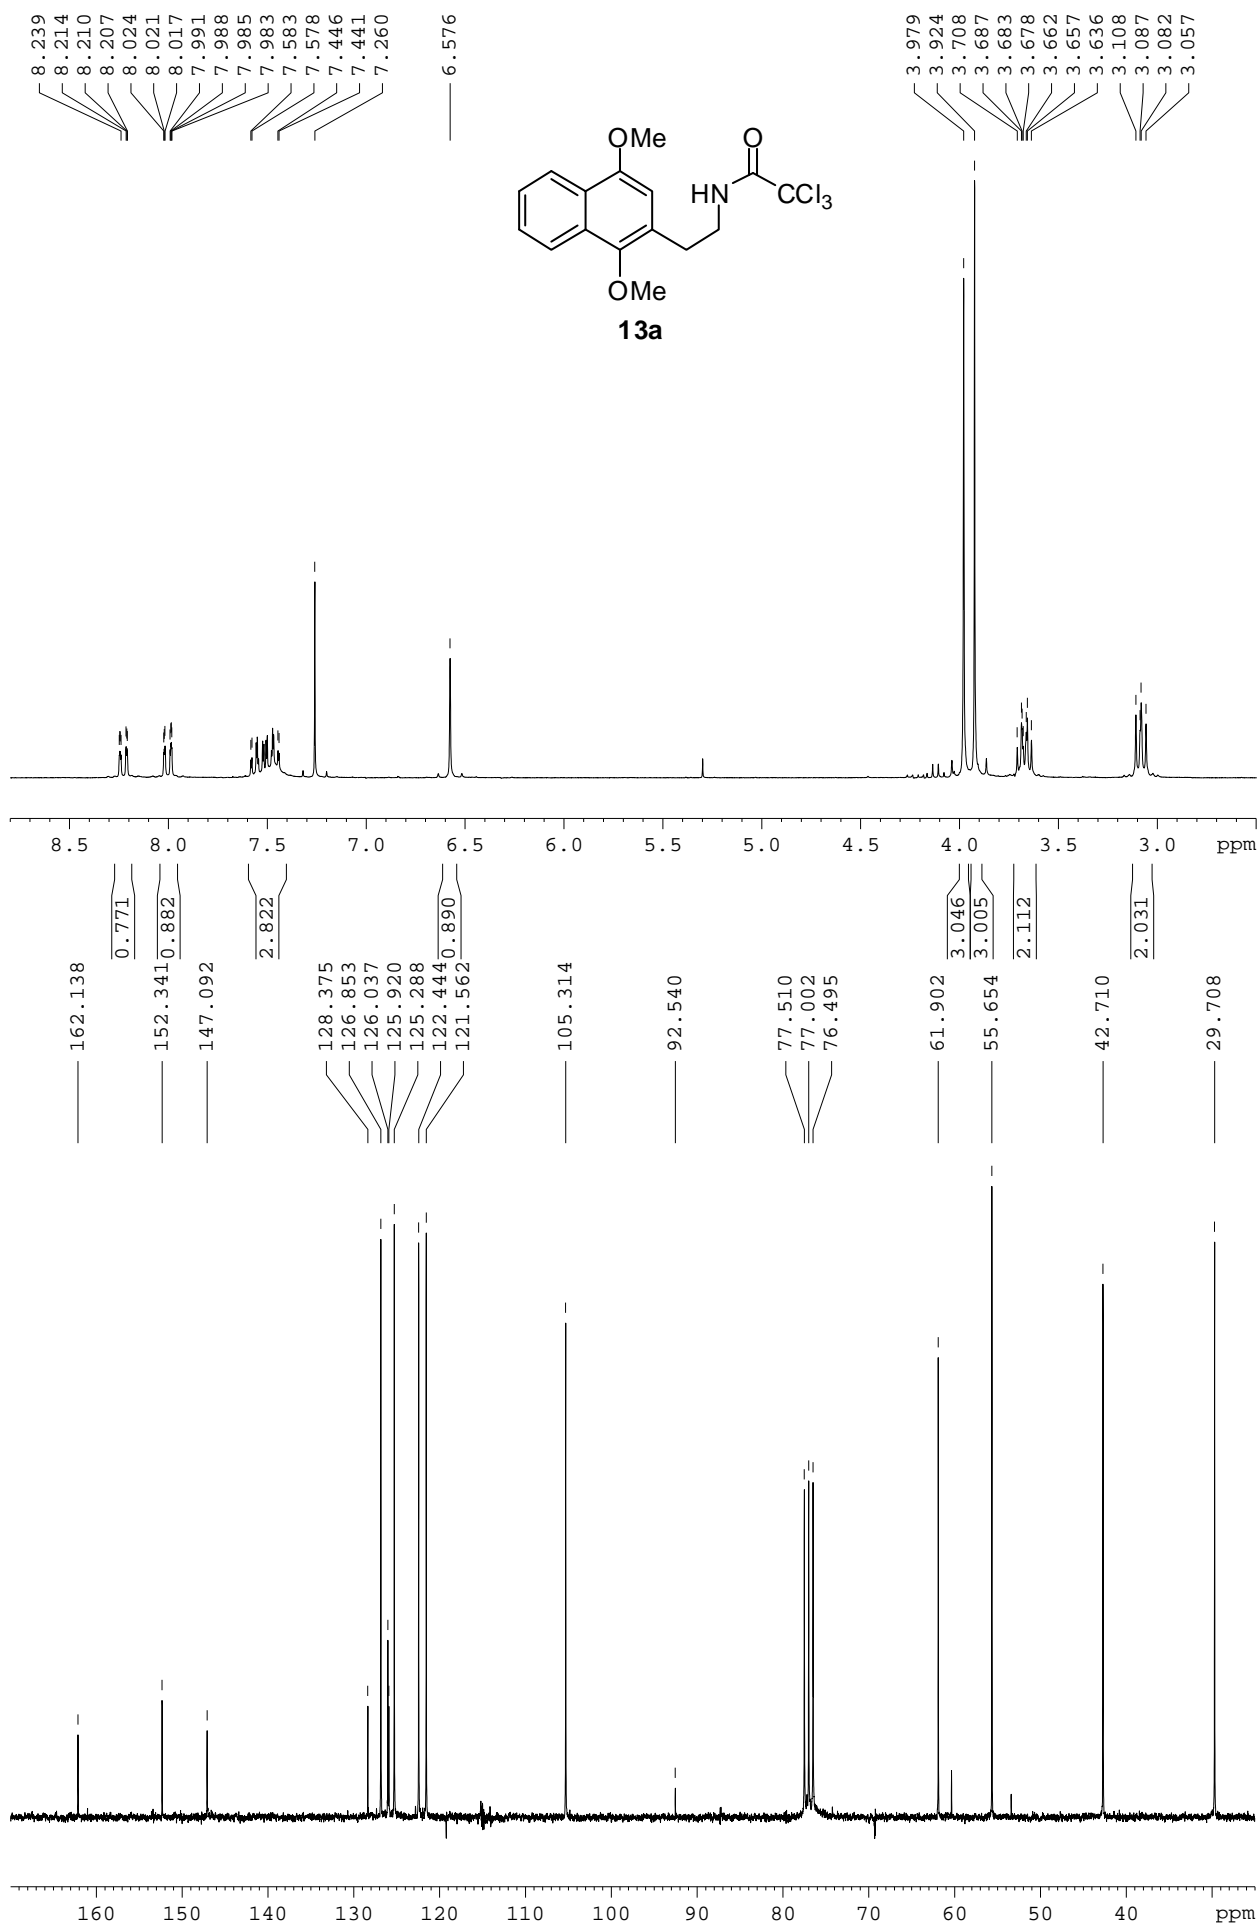

13a

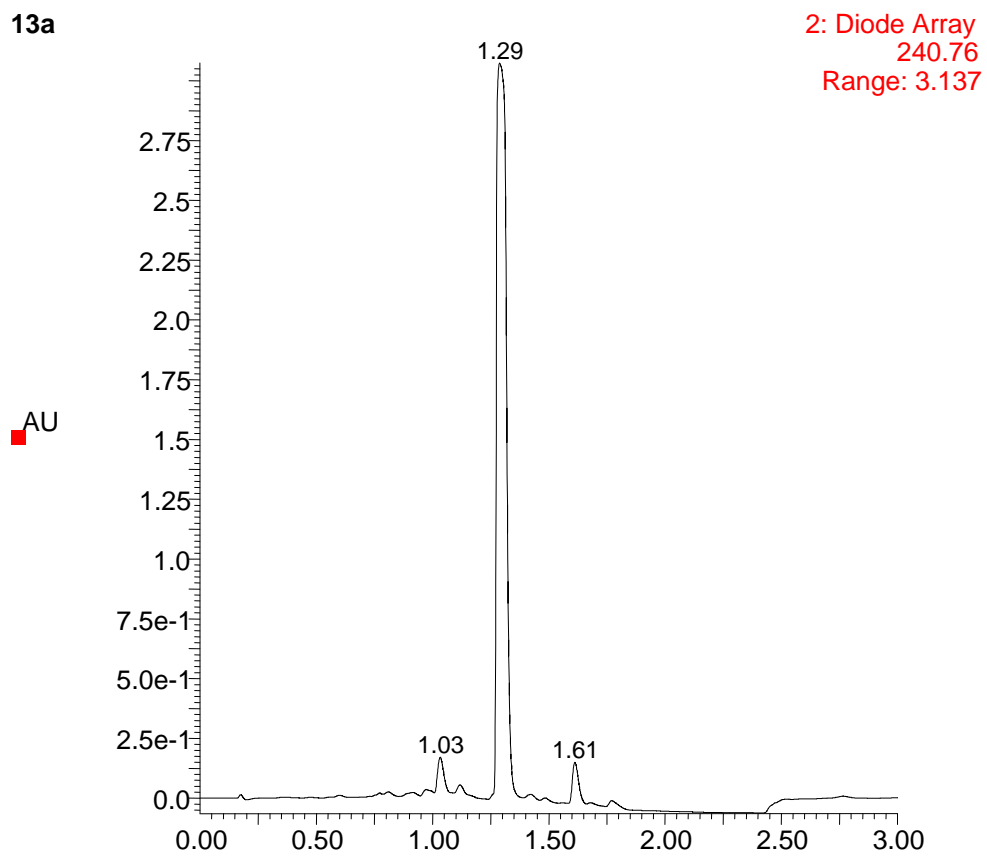

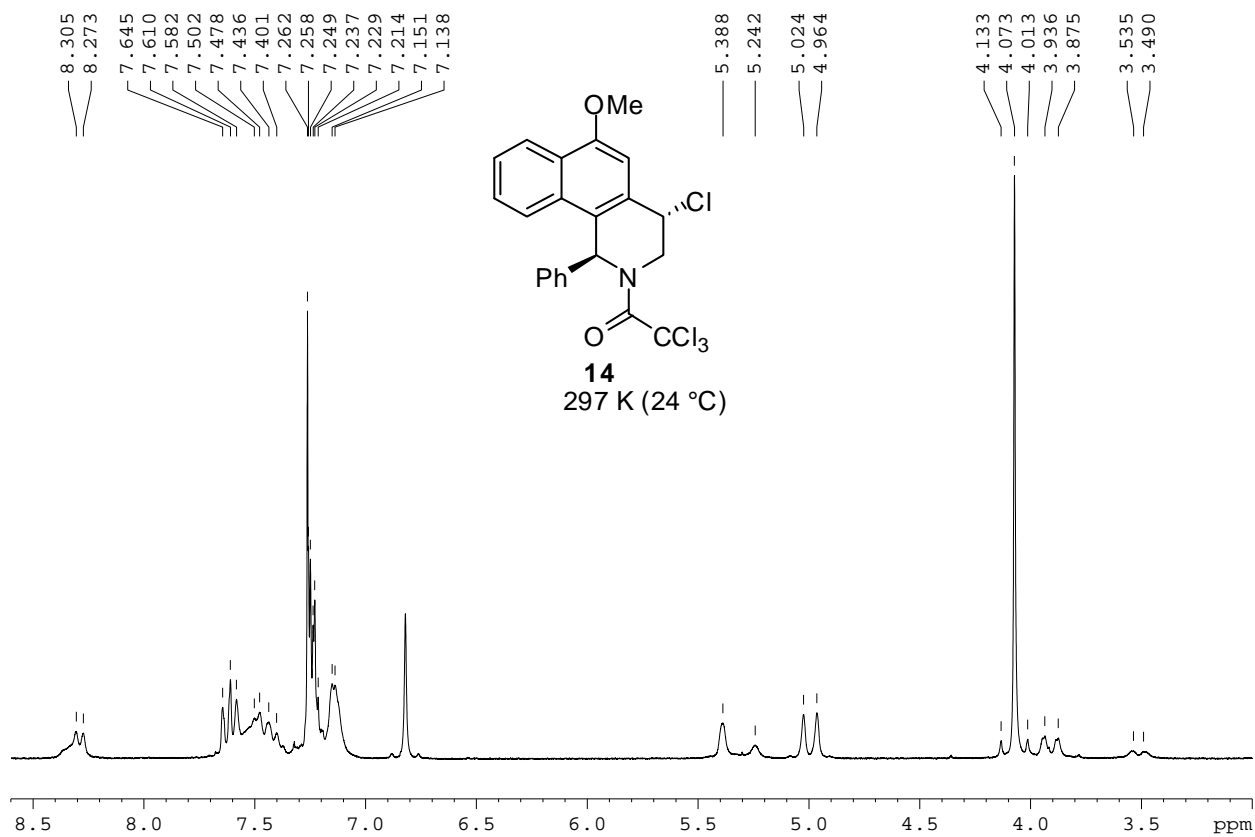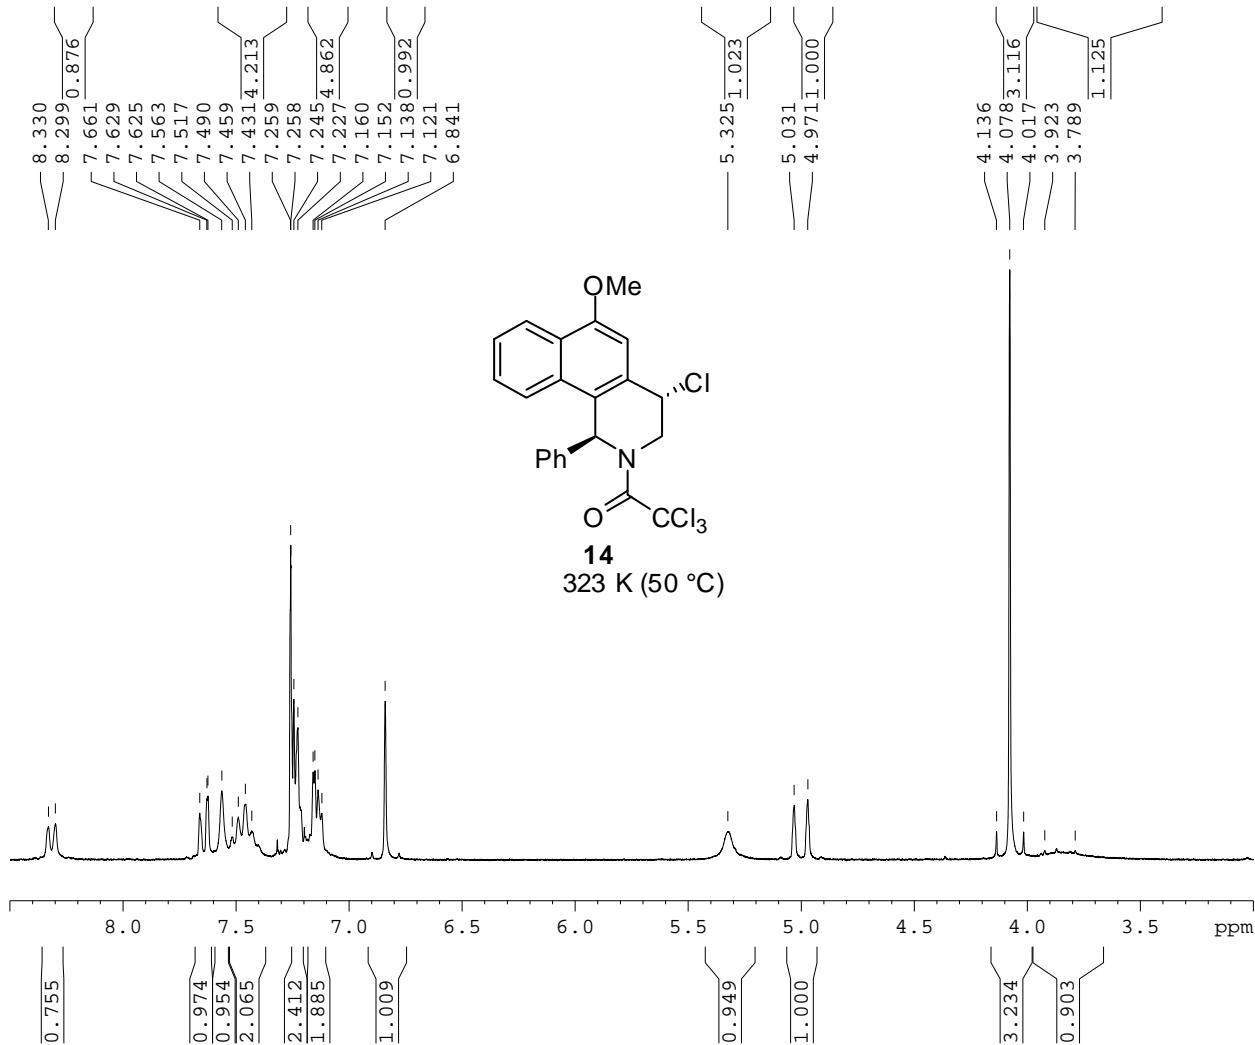

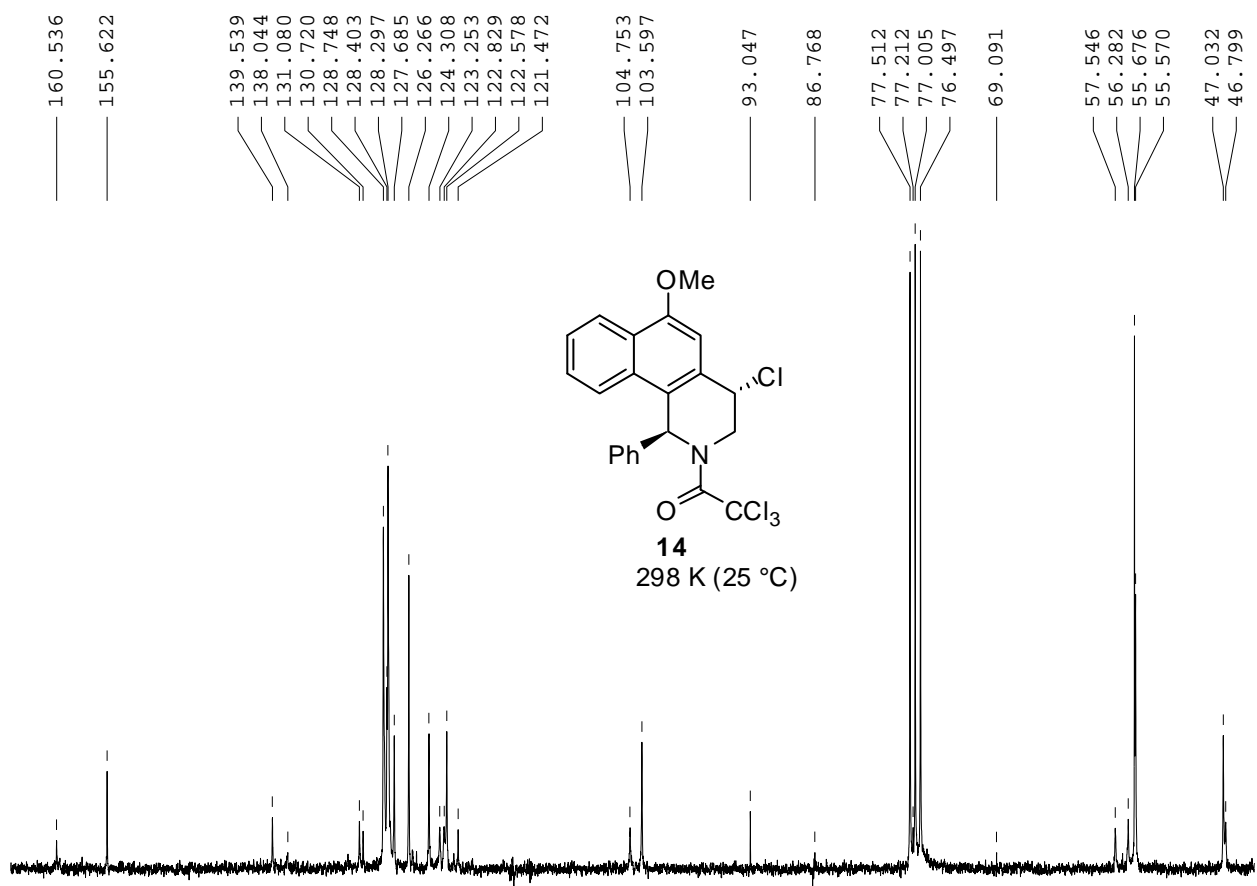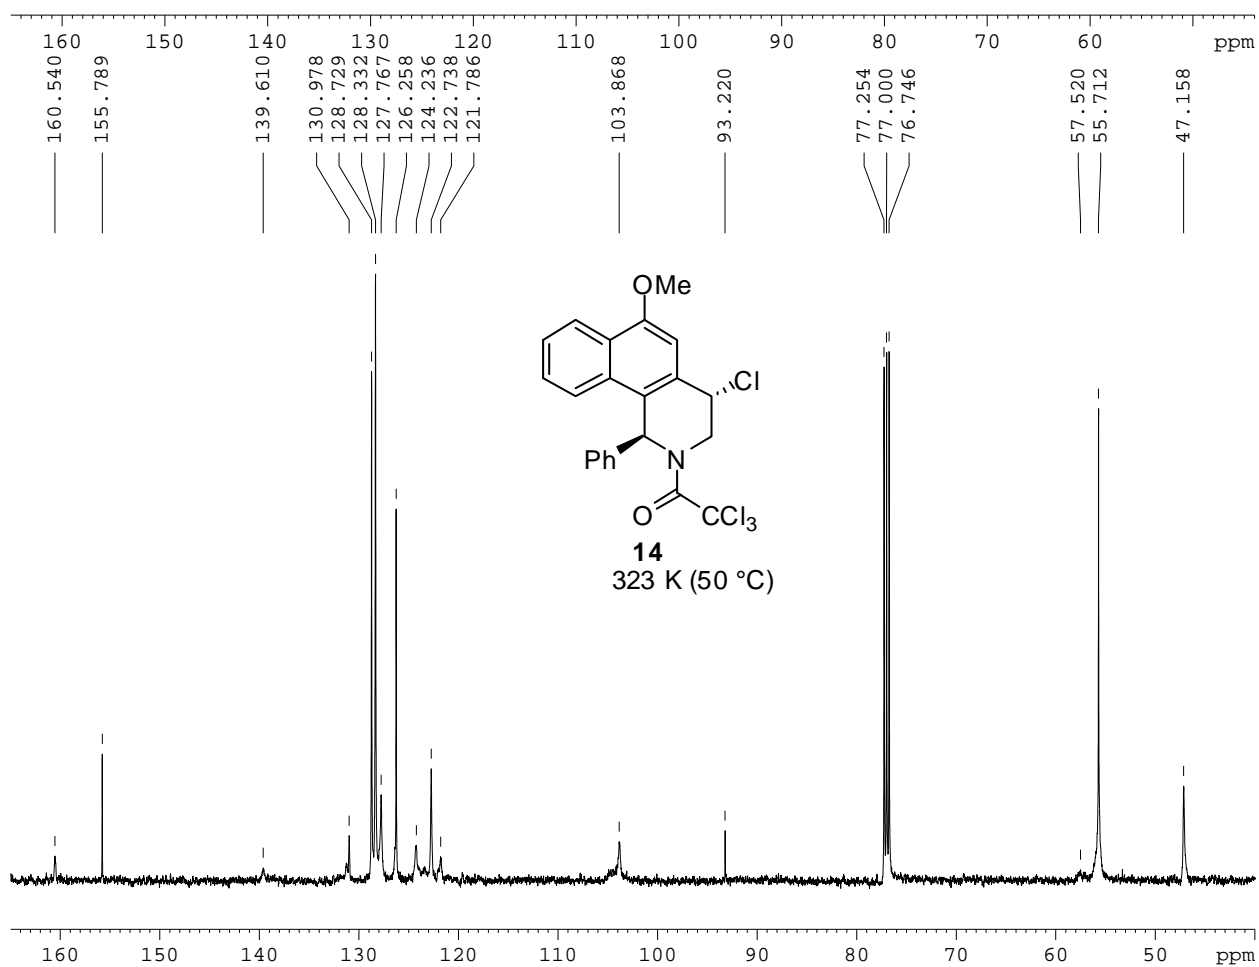

14

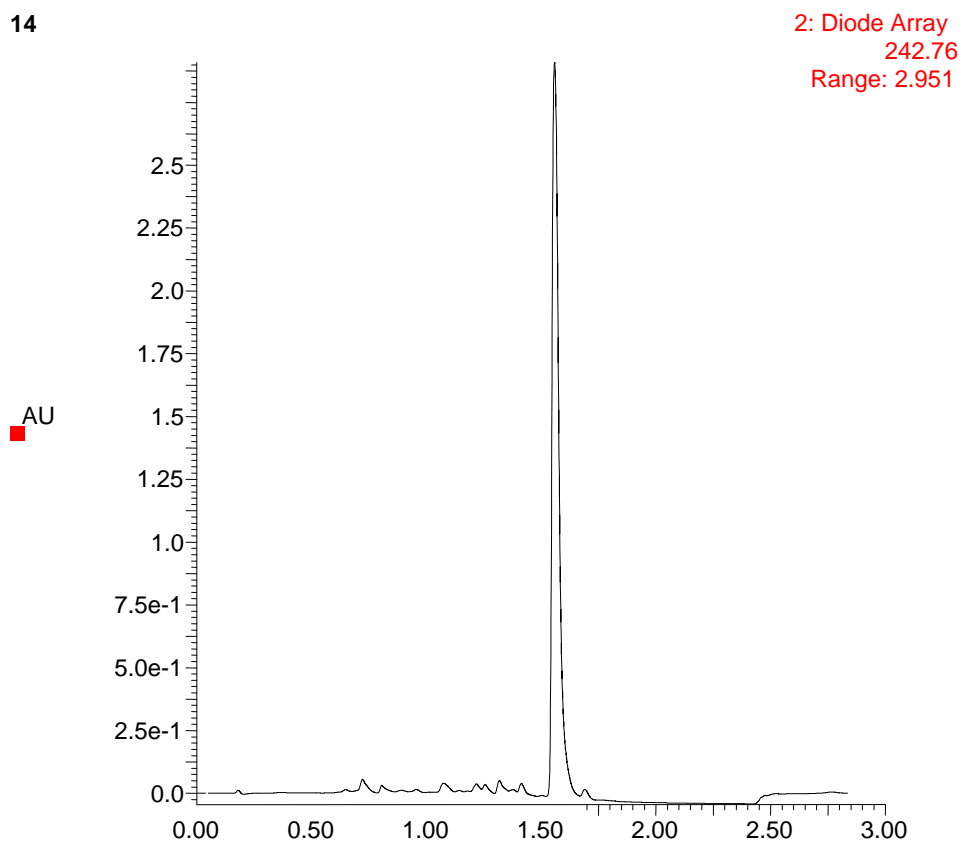

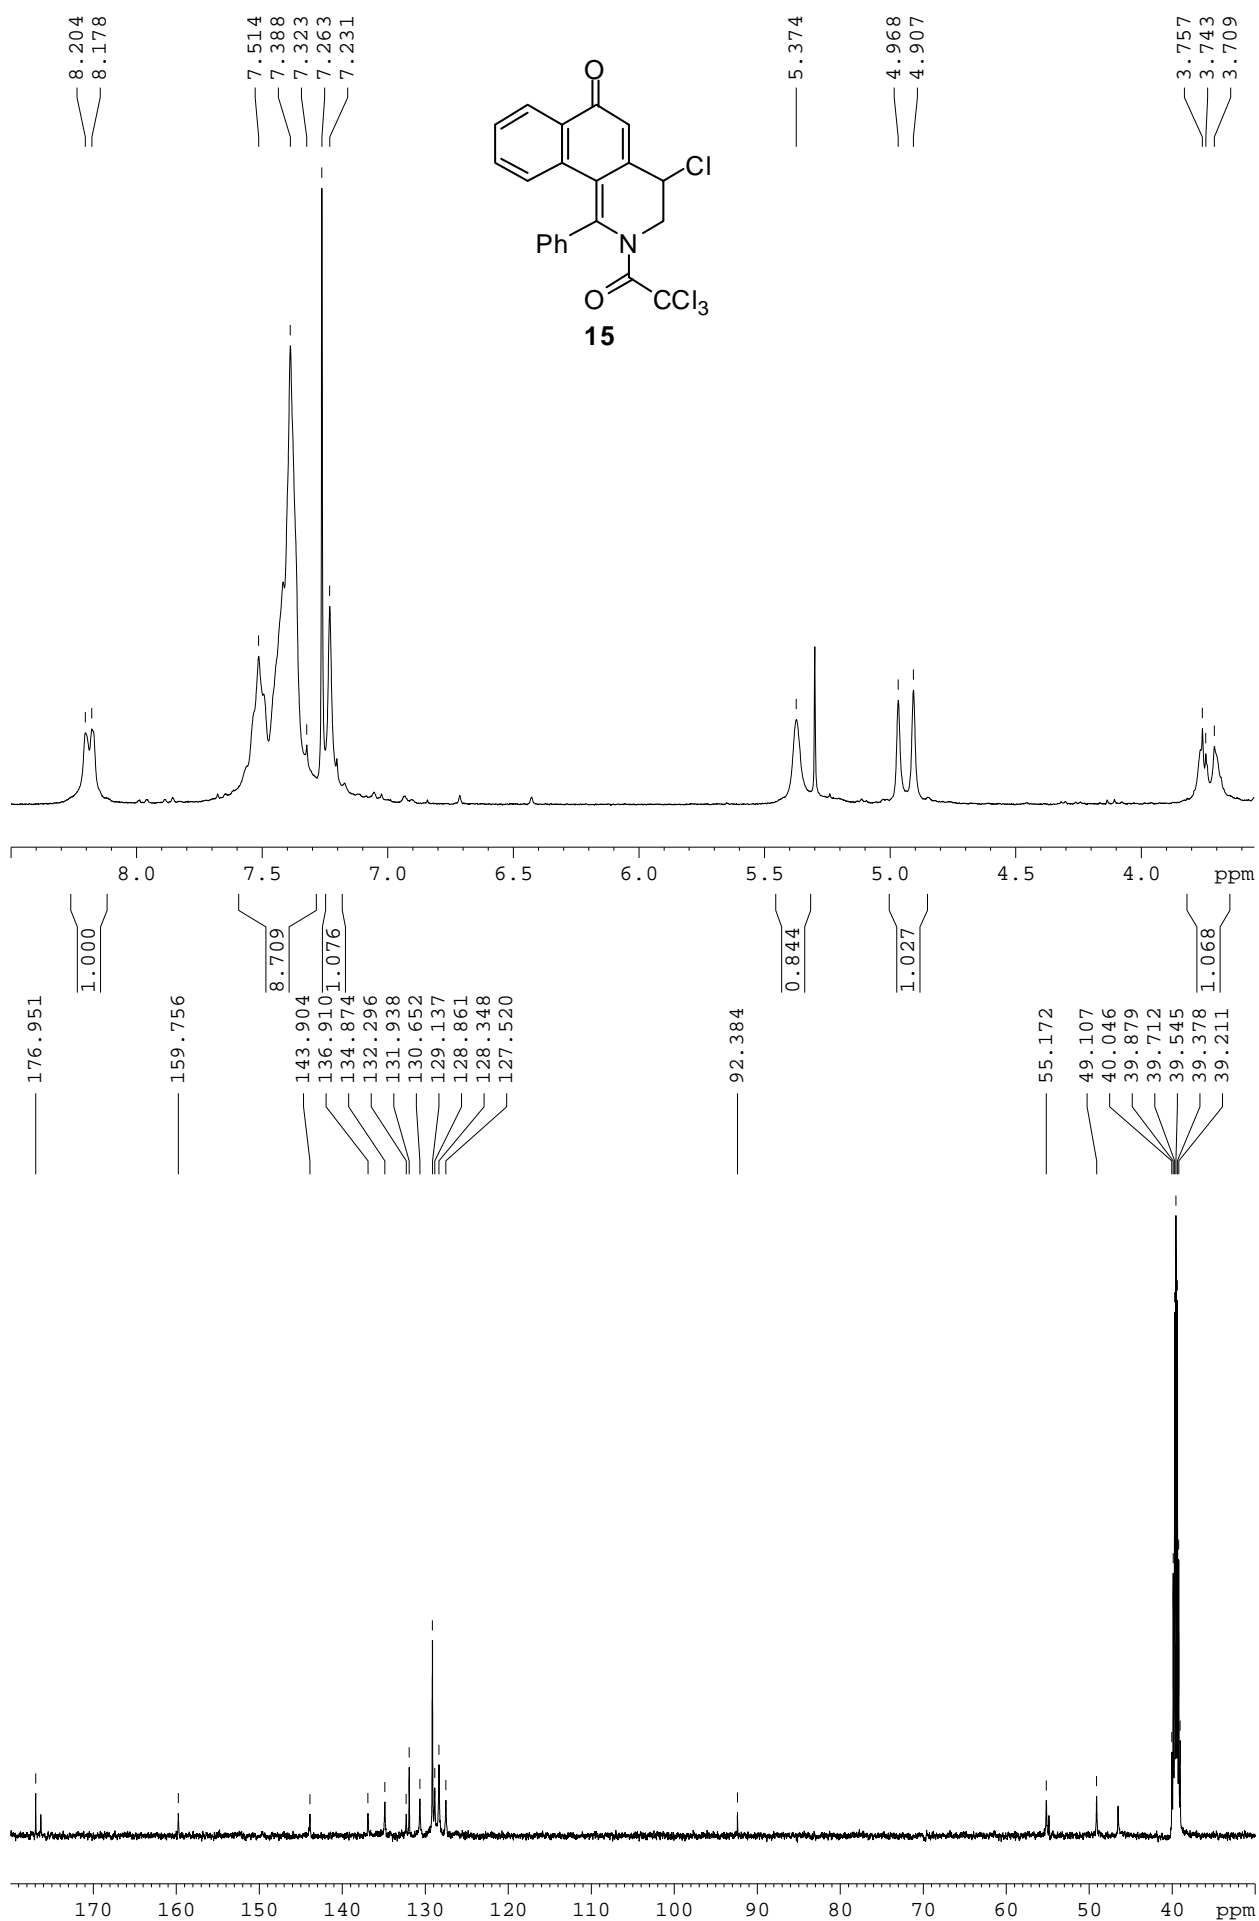

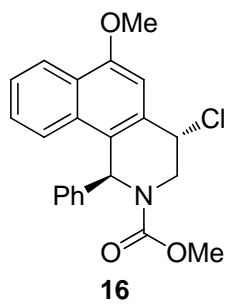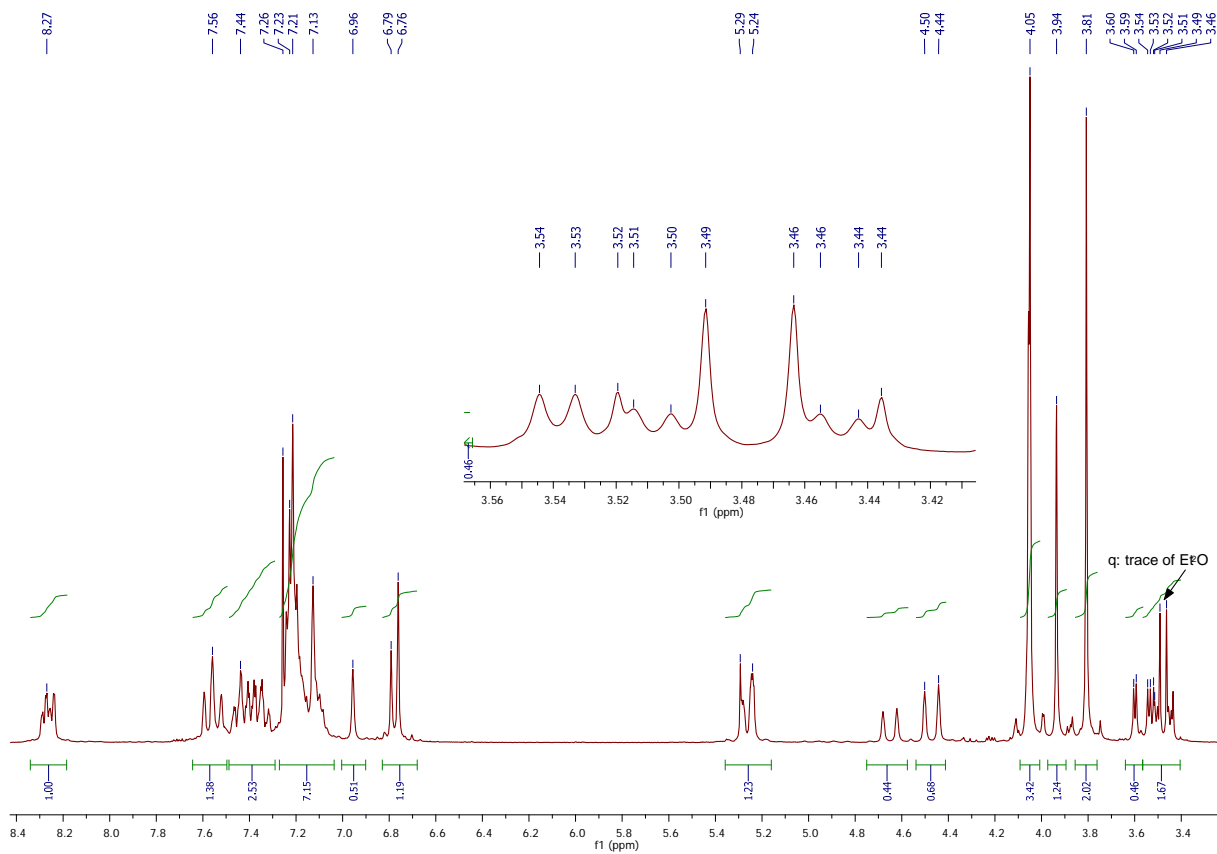



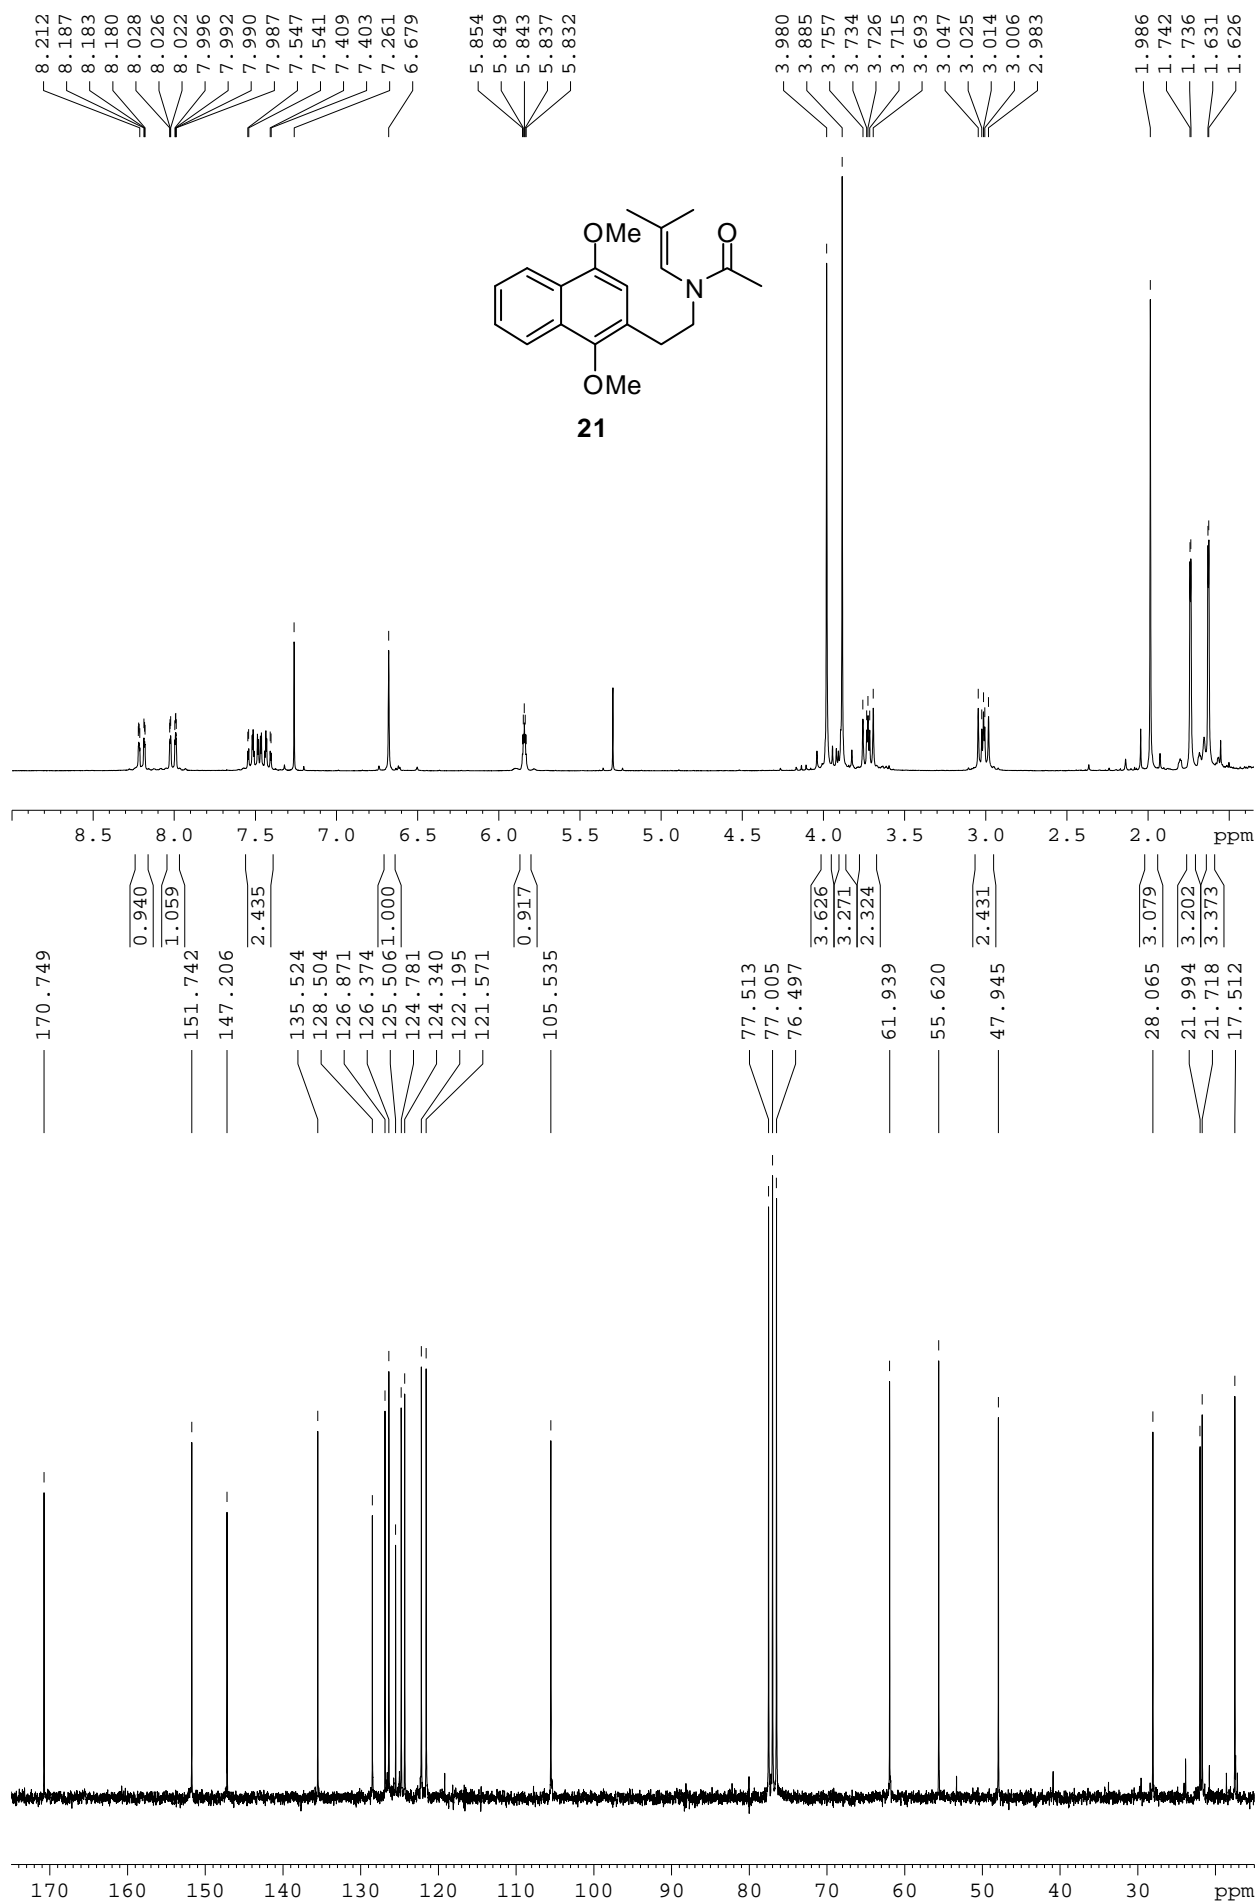

21

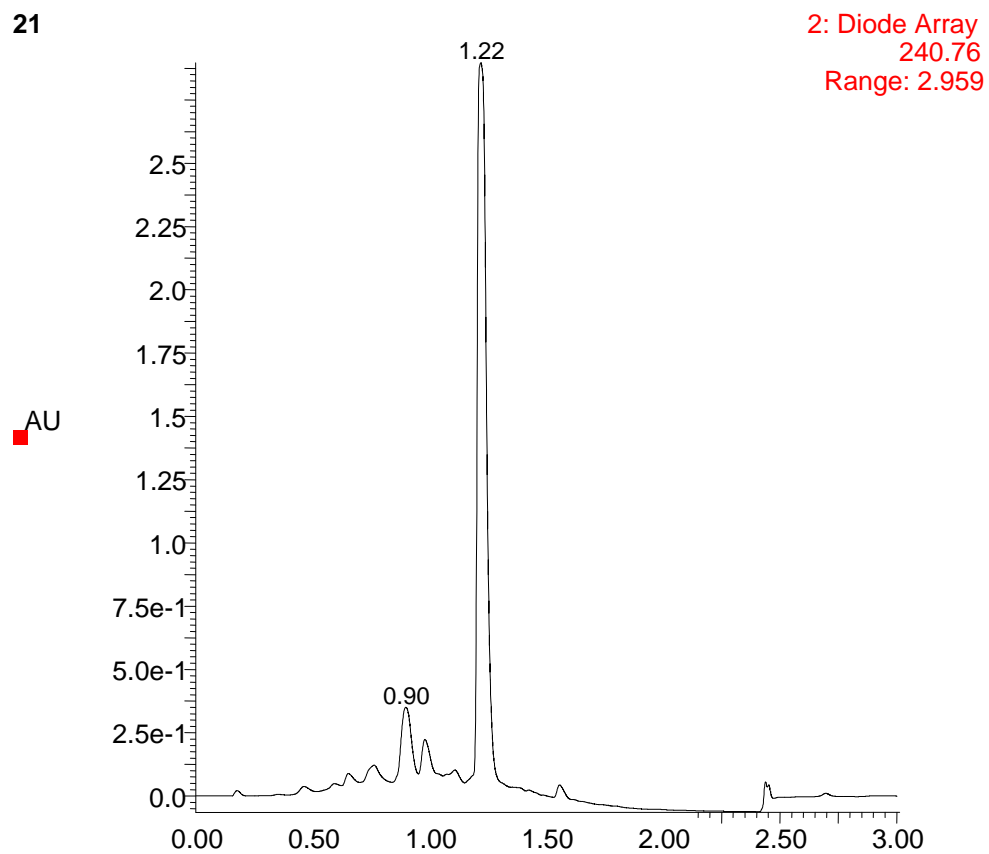

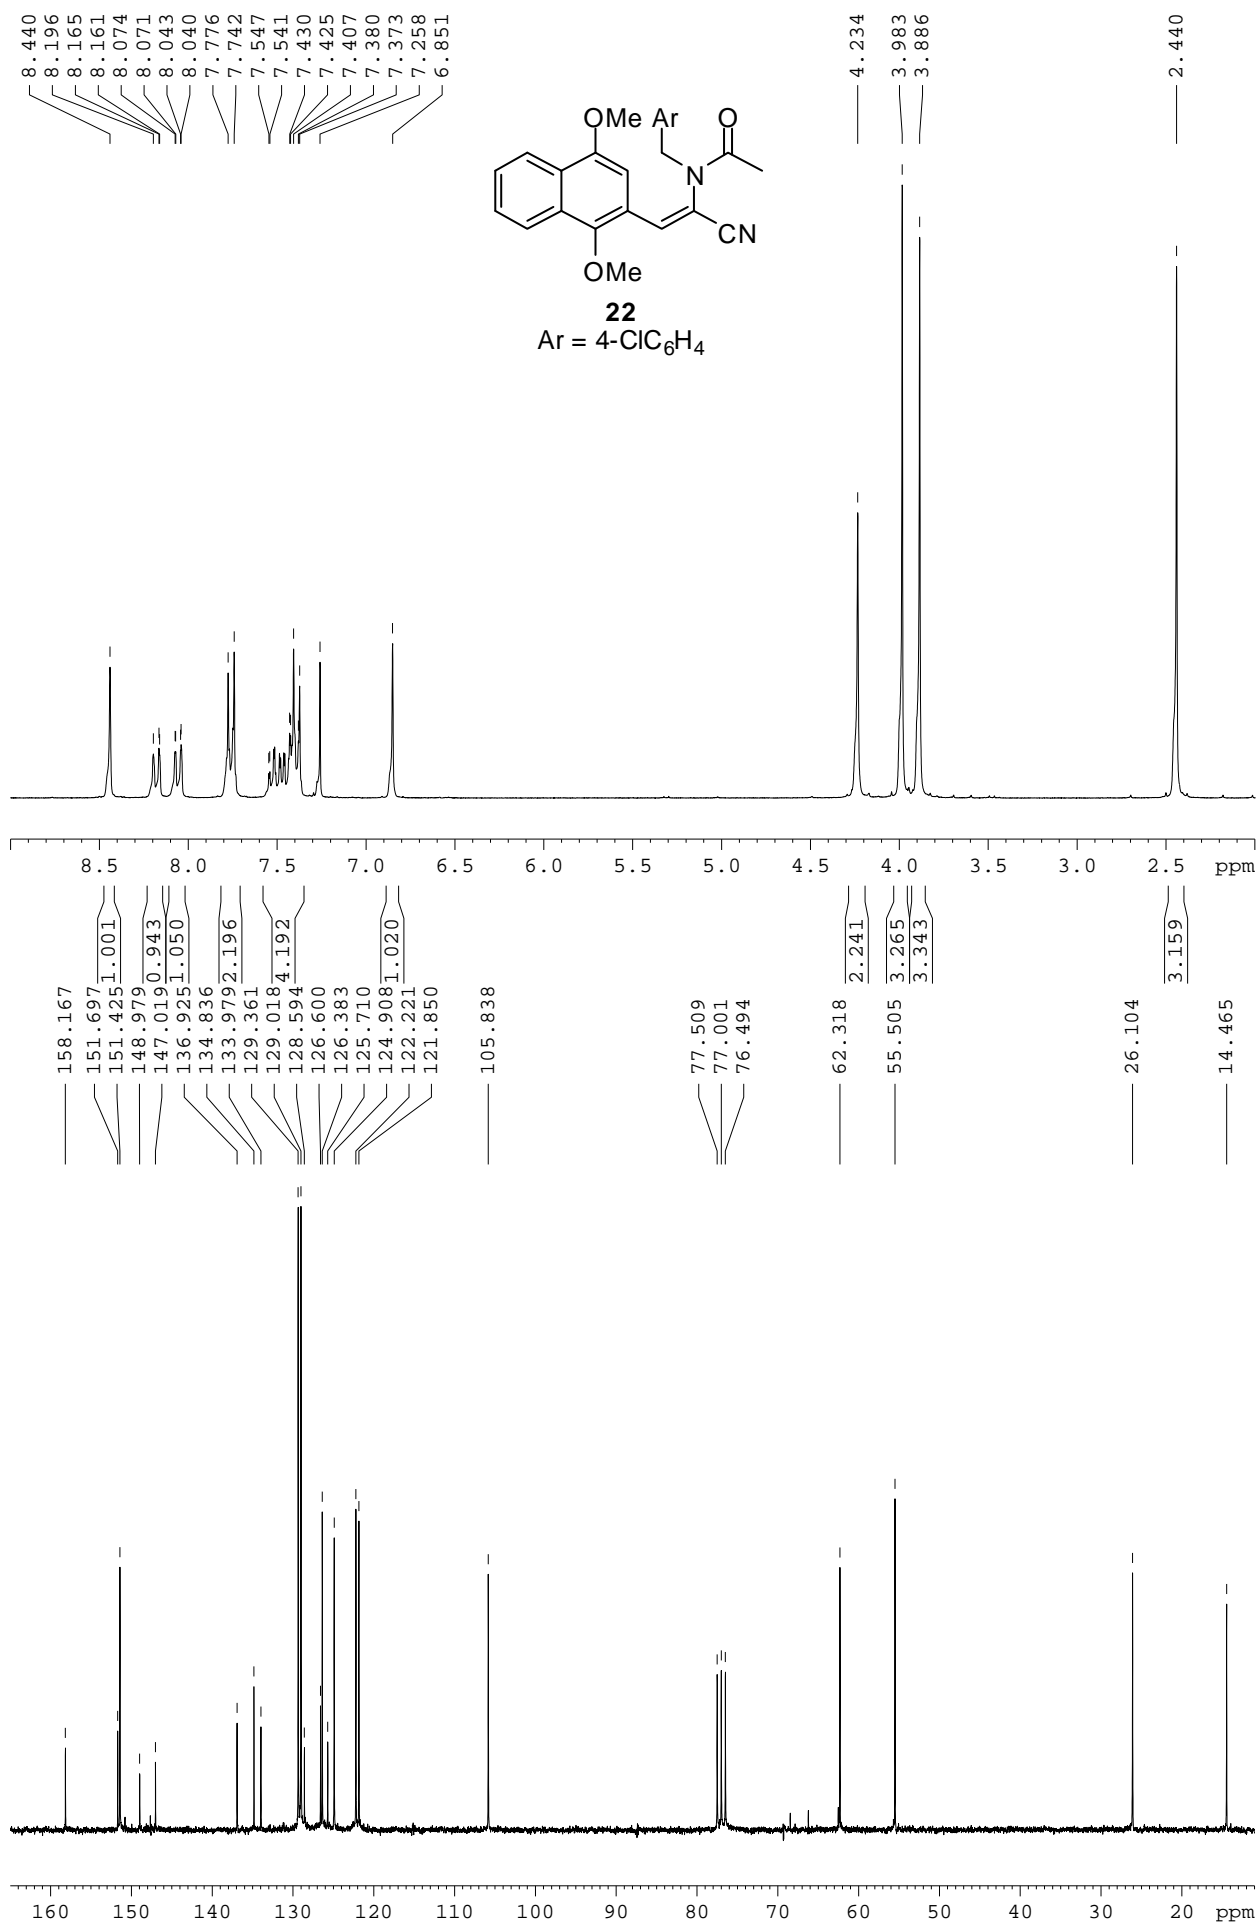

22

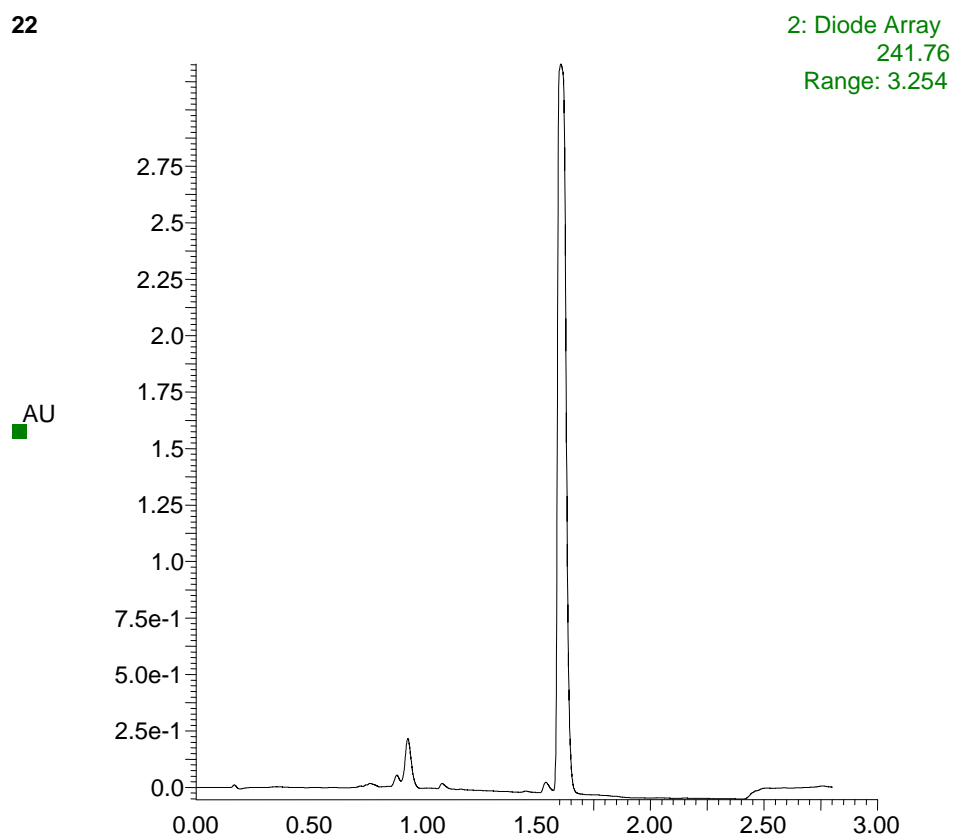

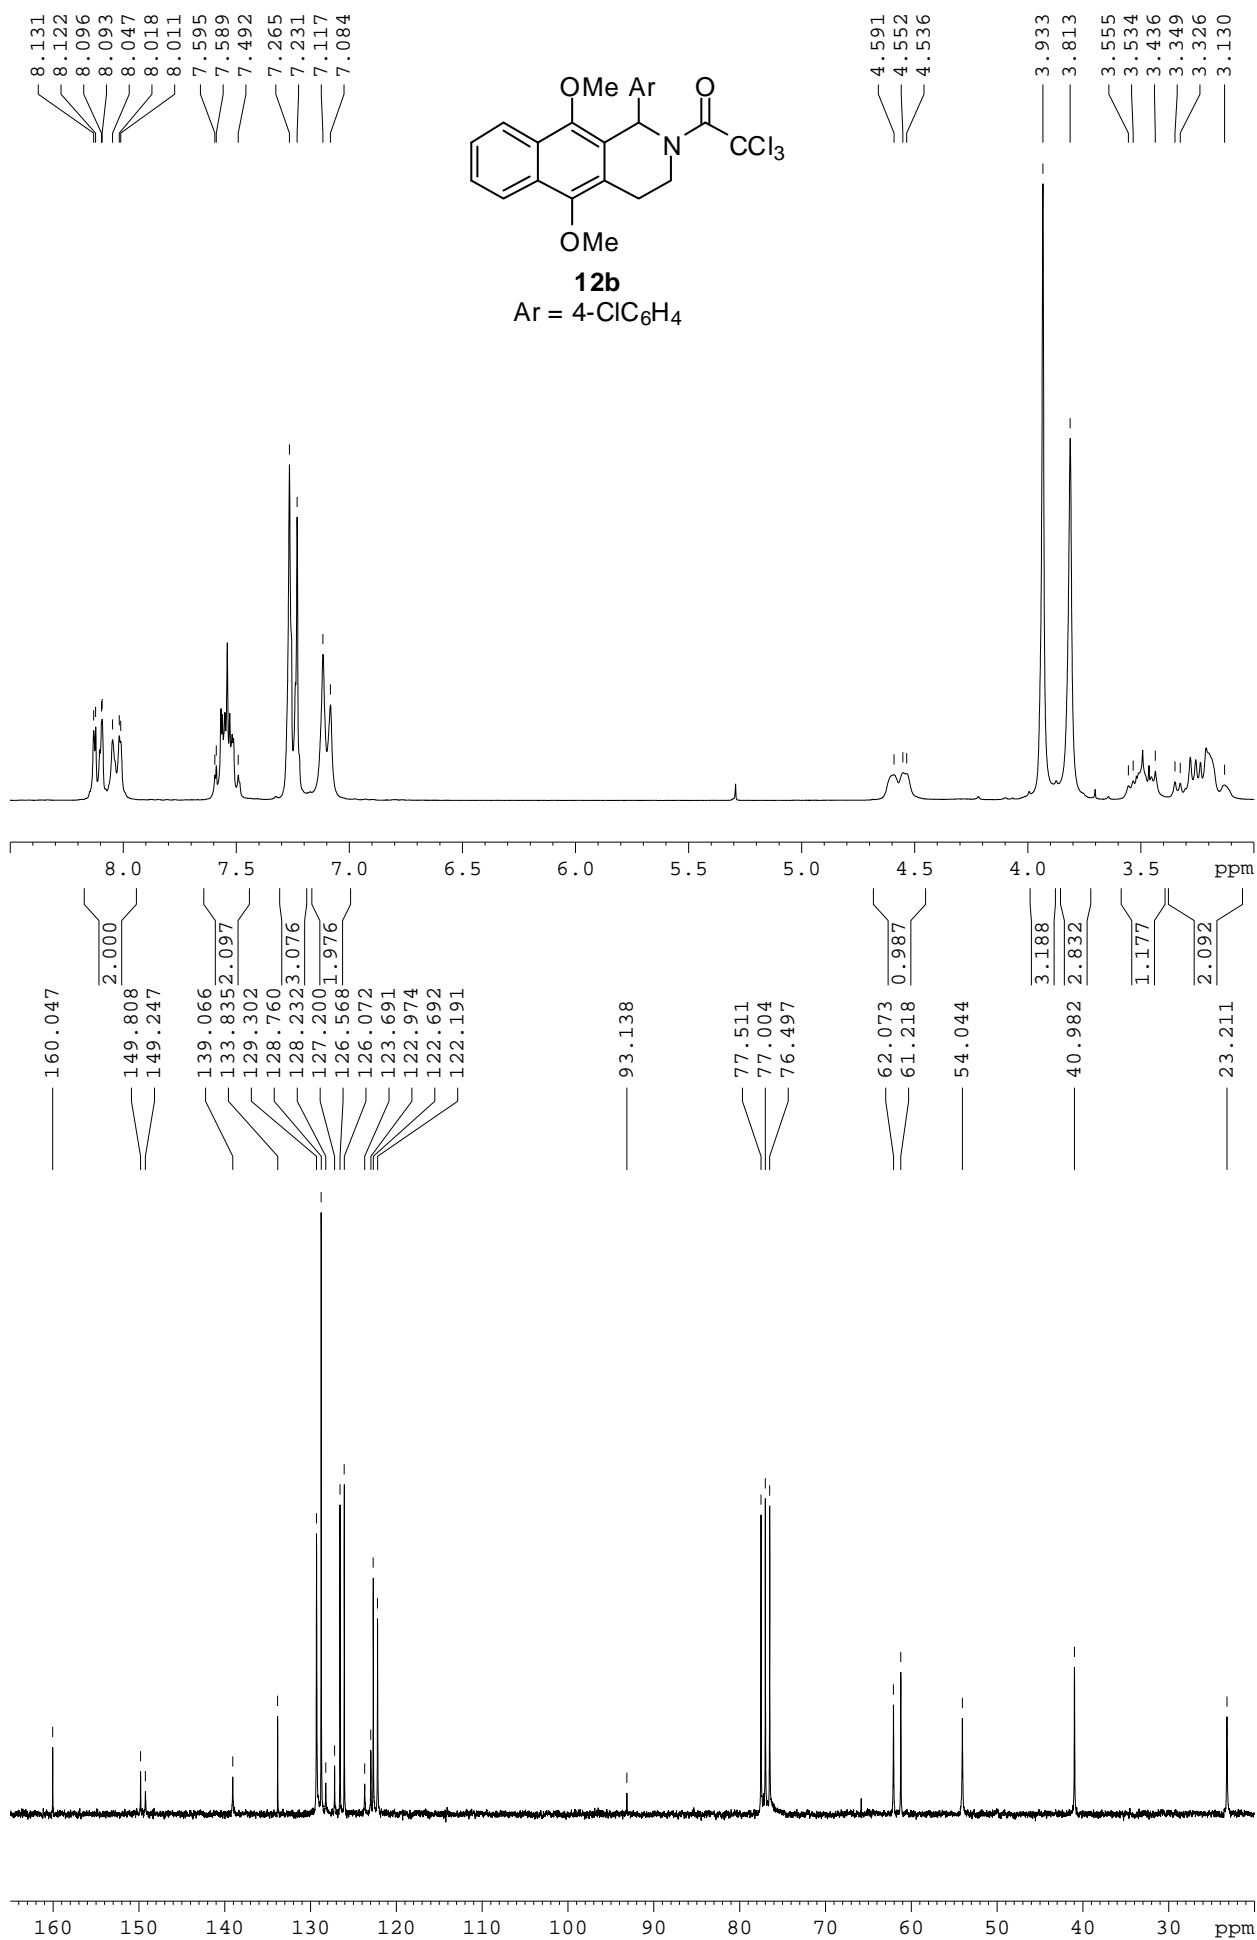

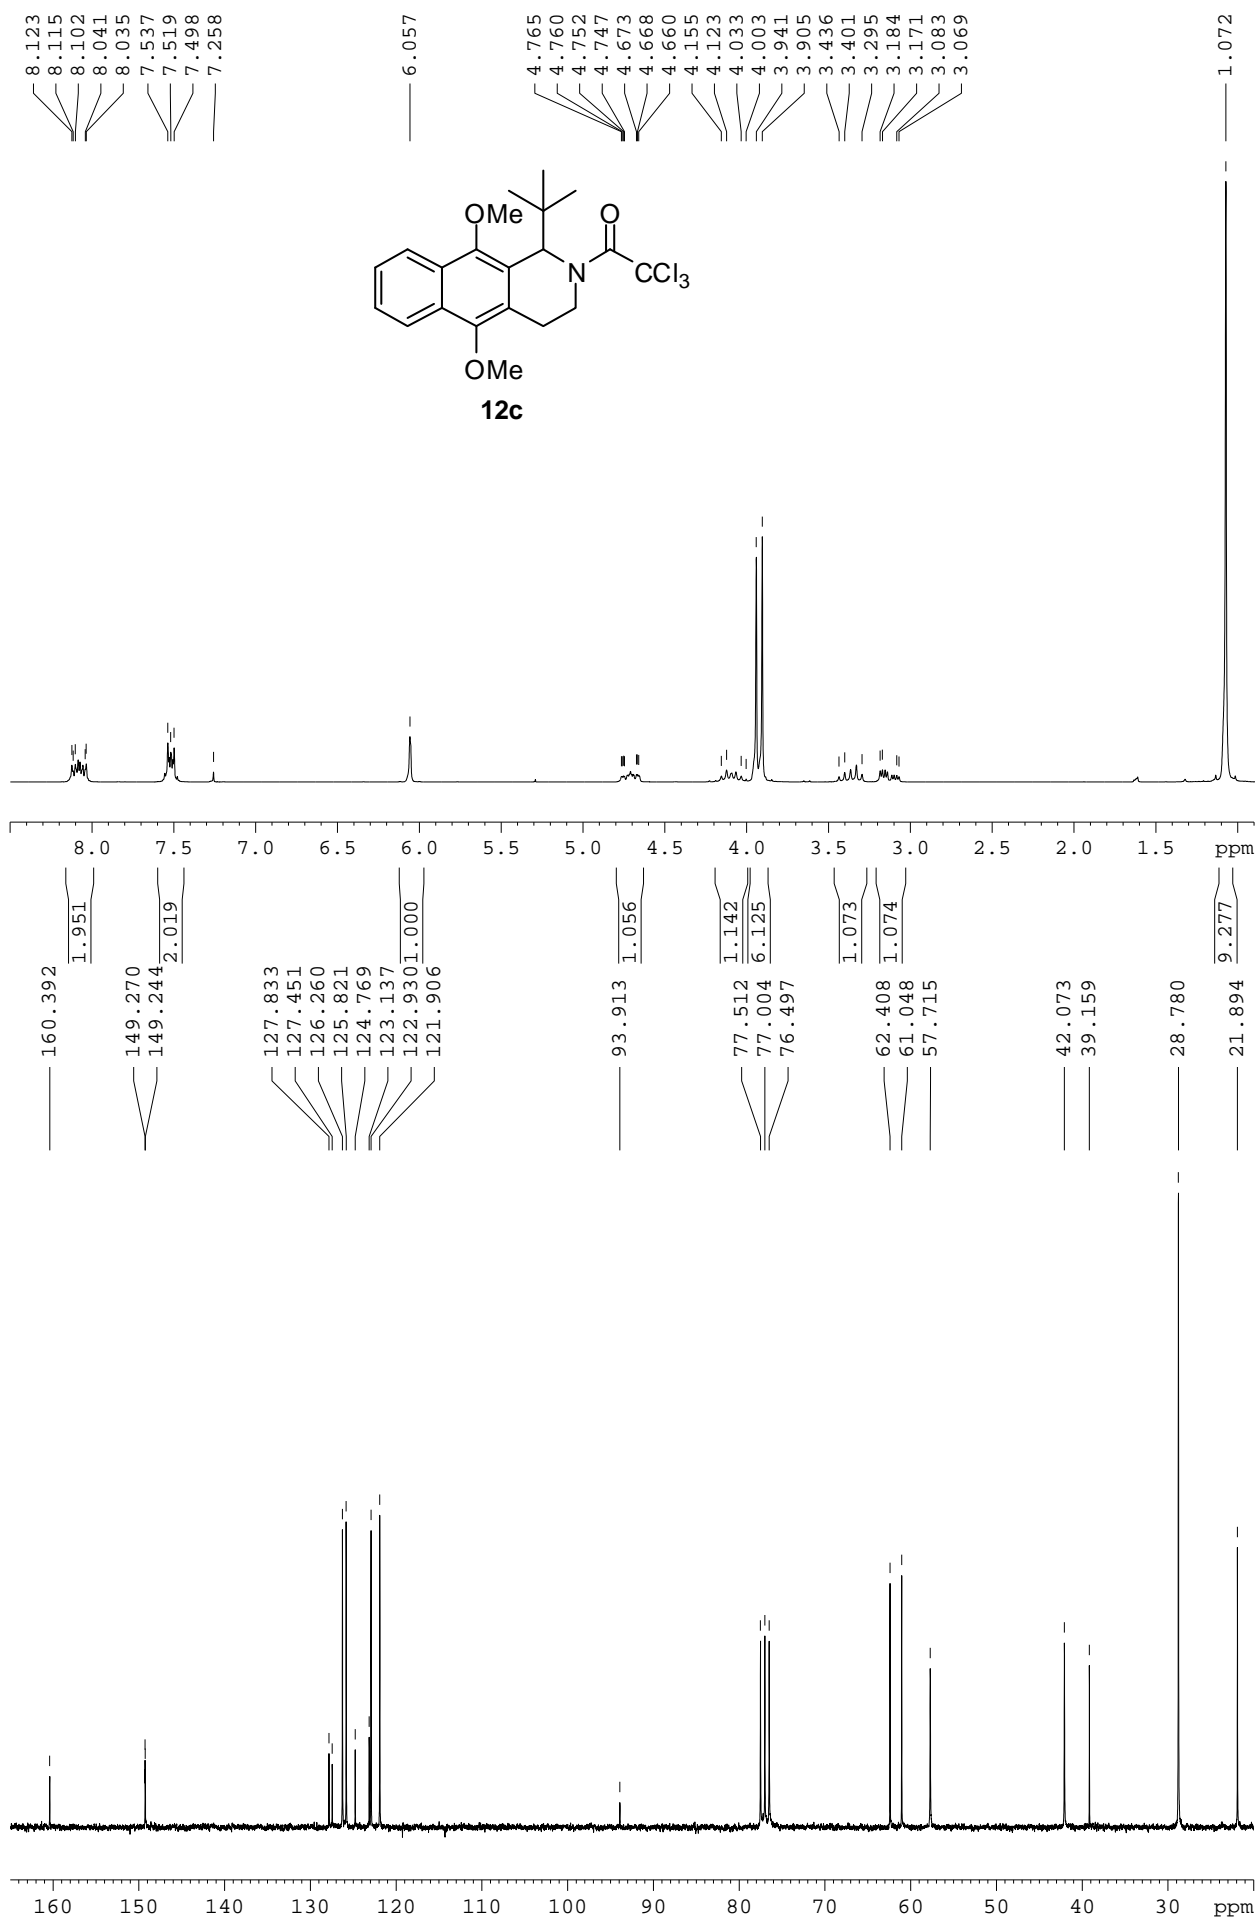

12c

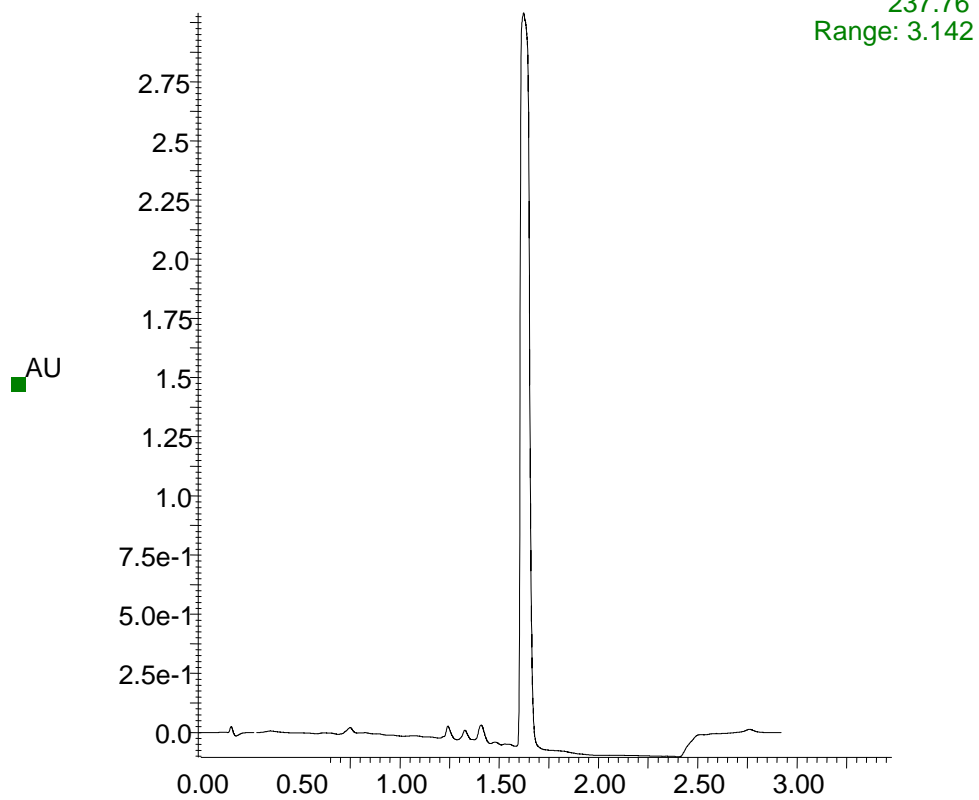

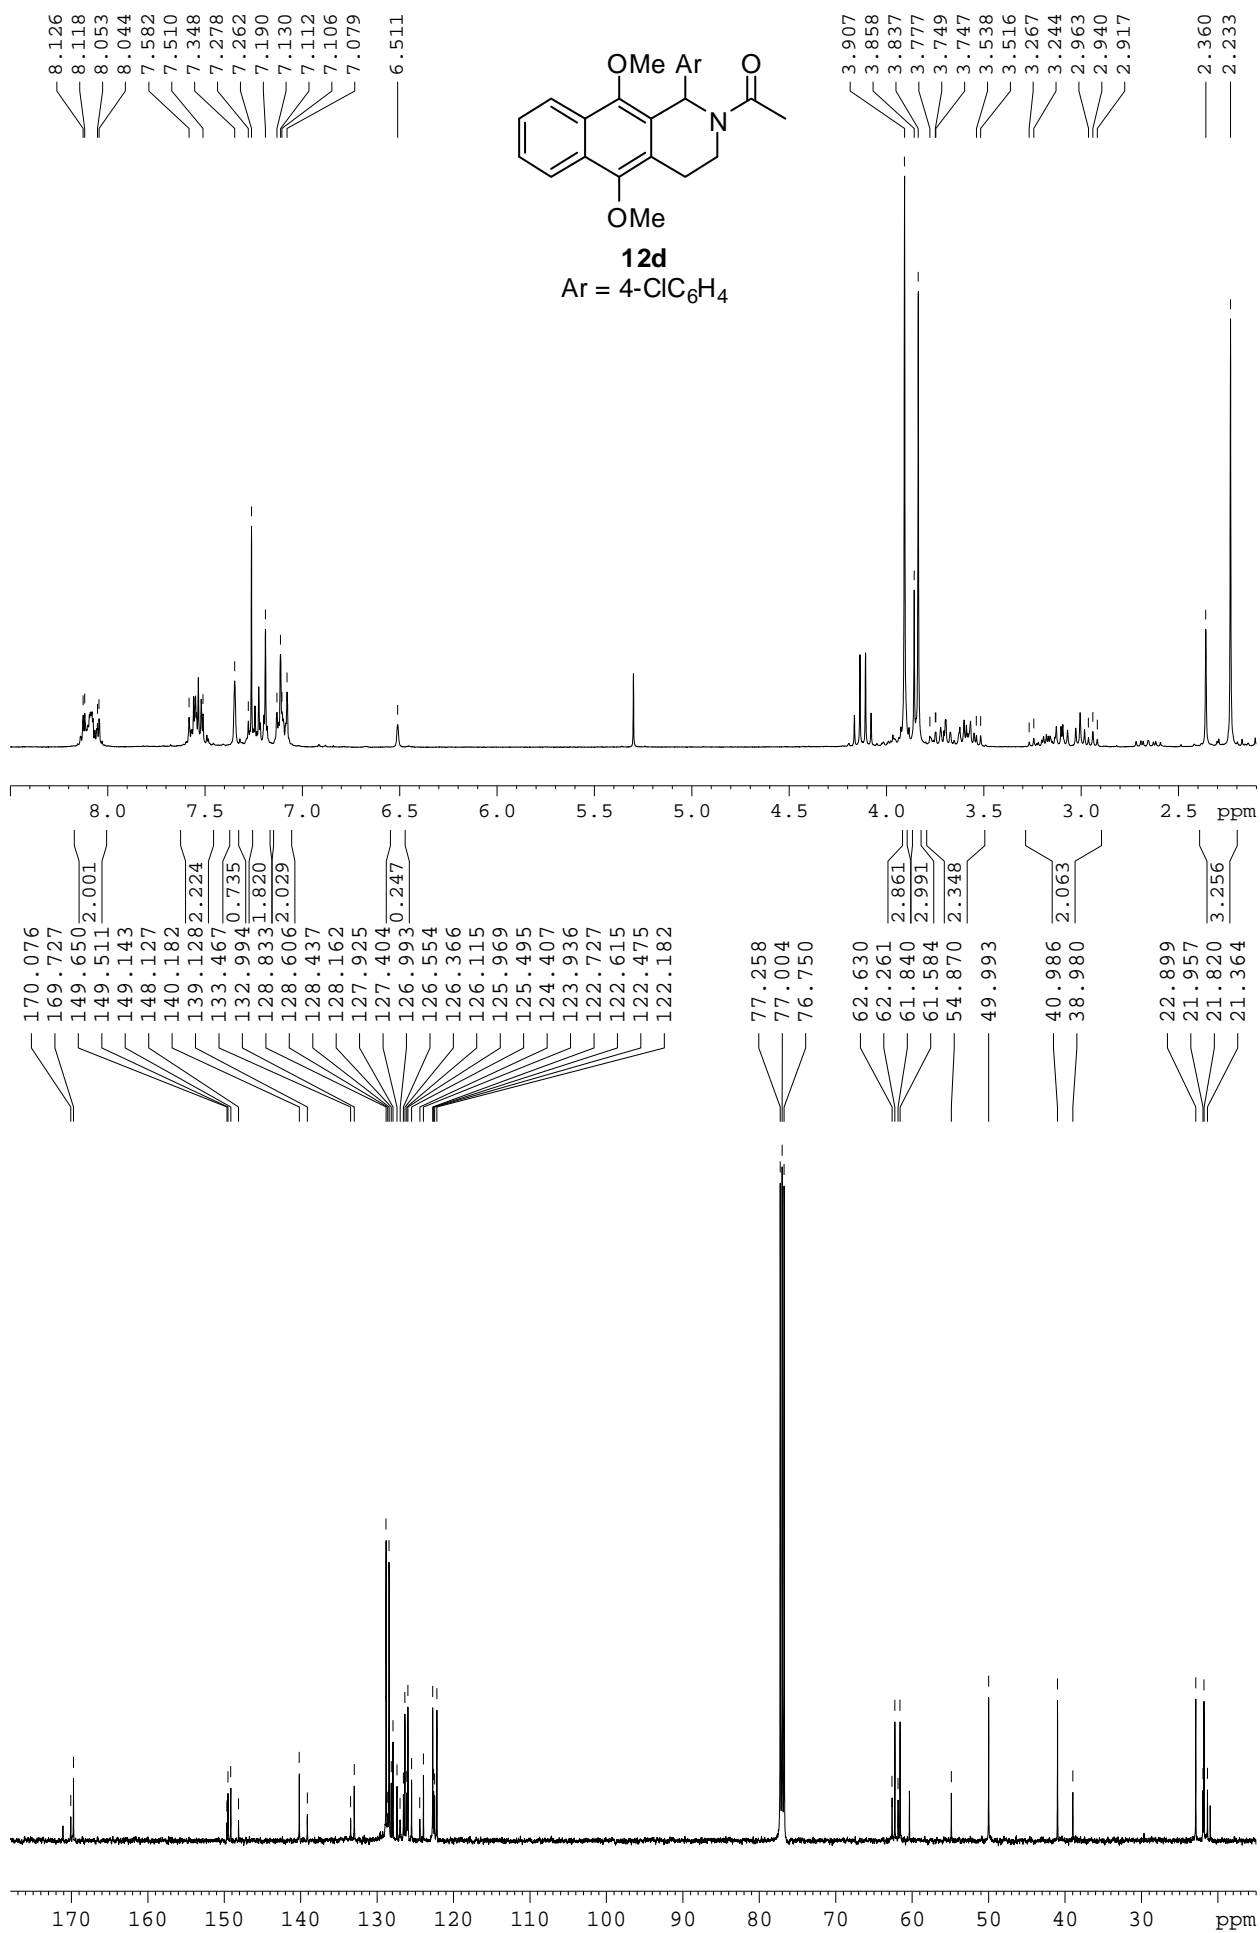



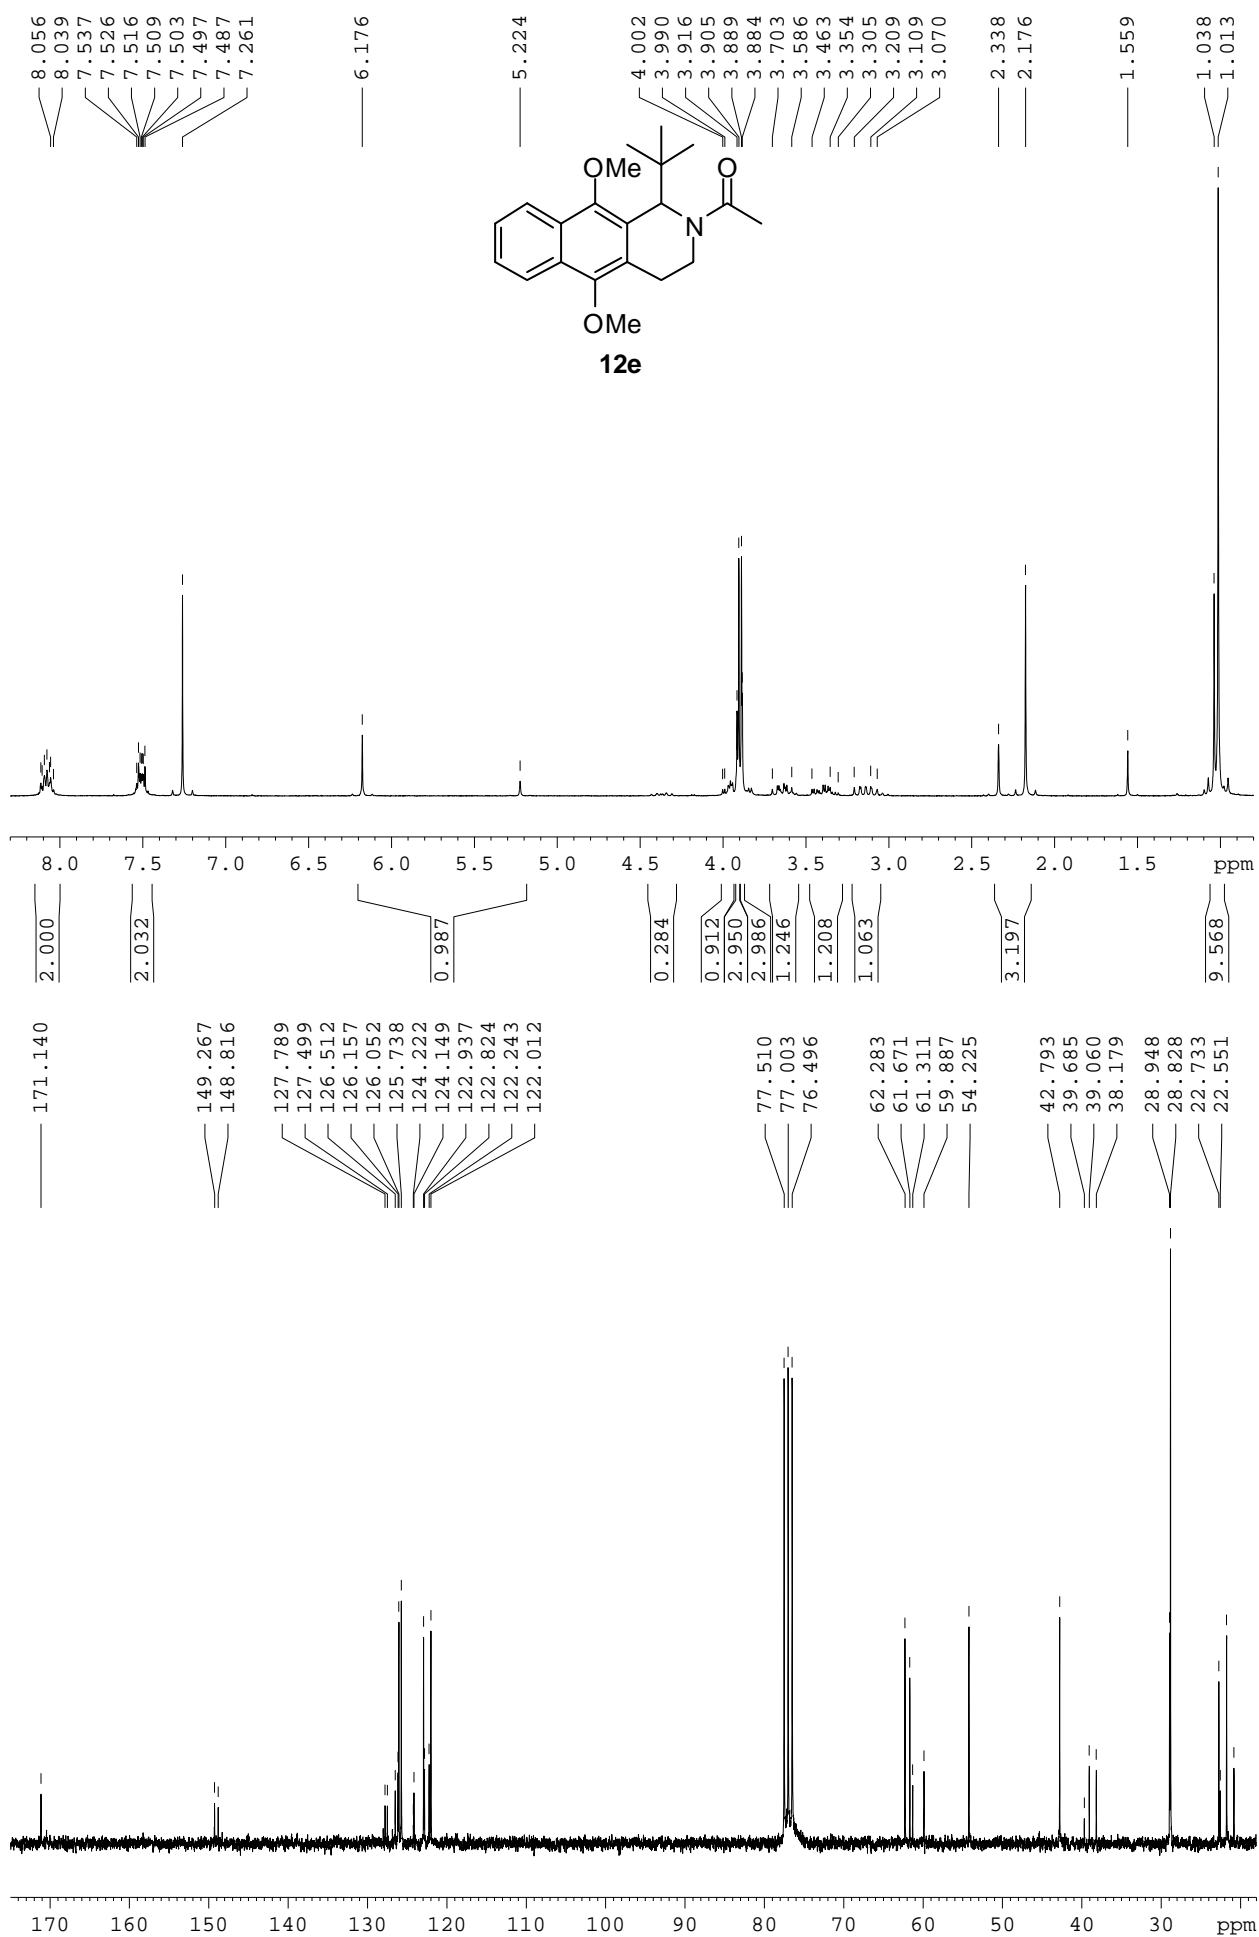

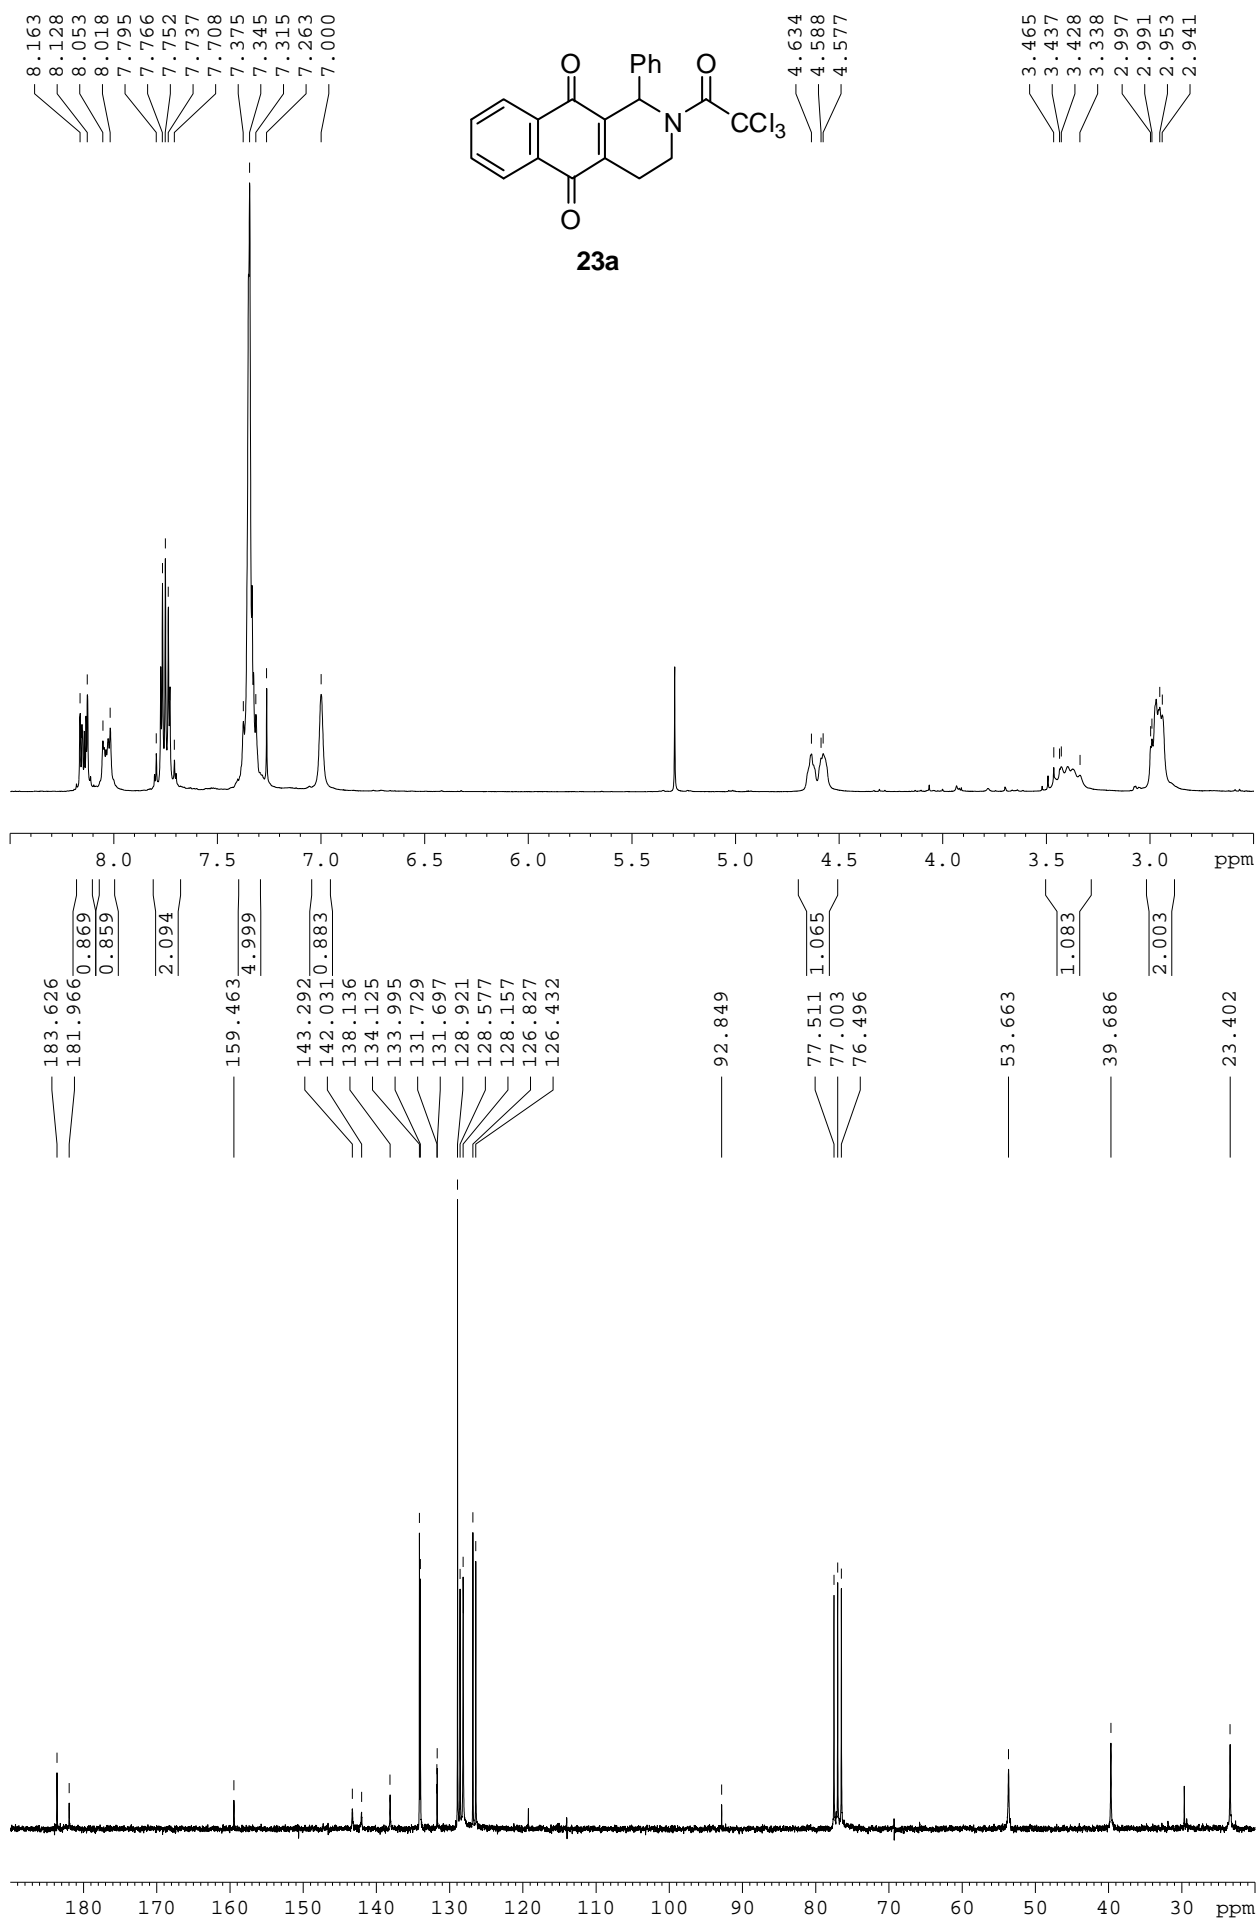

23a

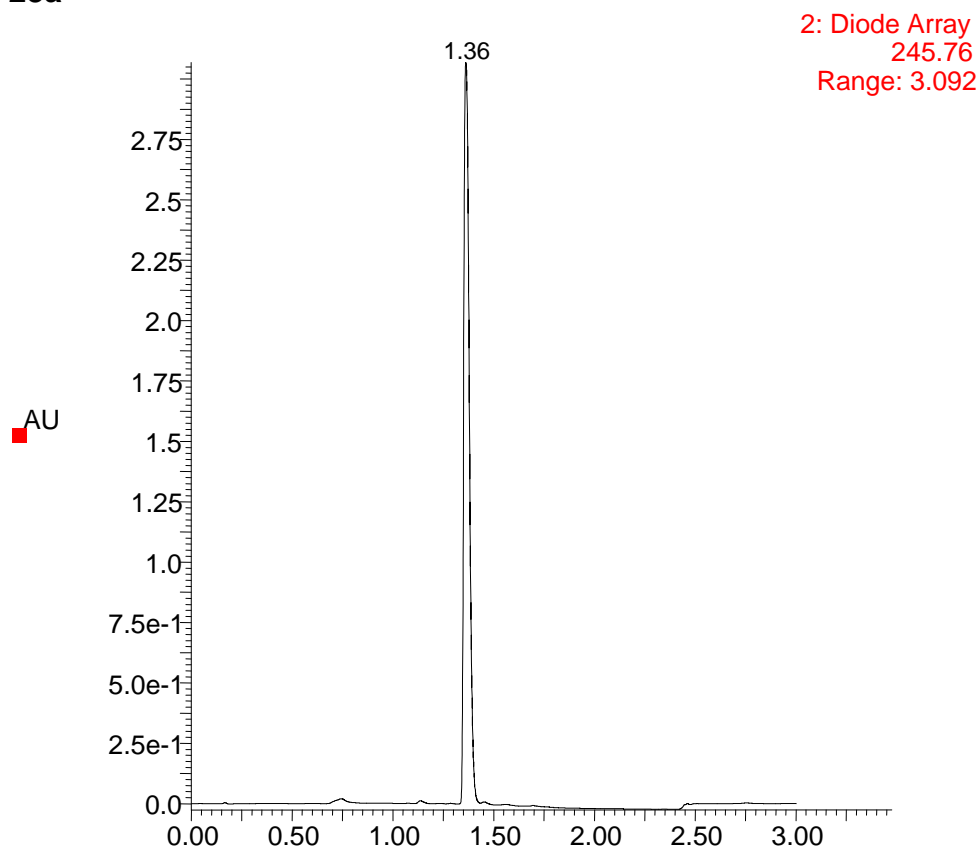

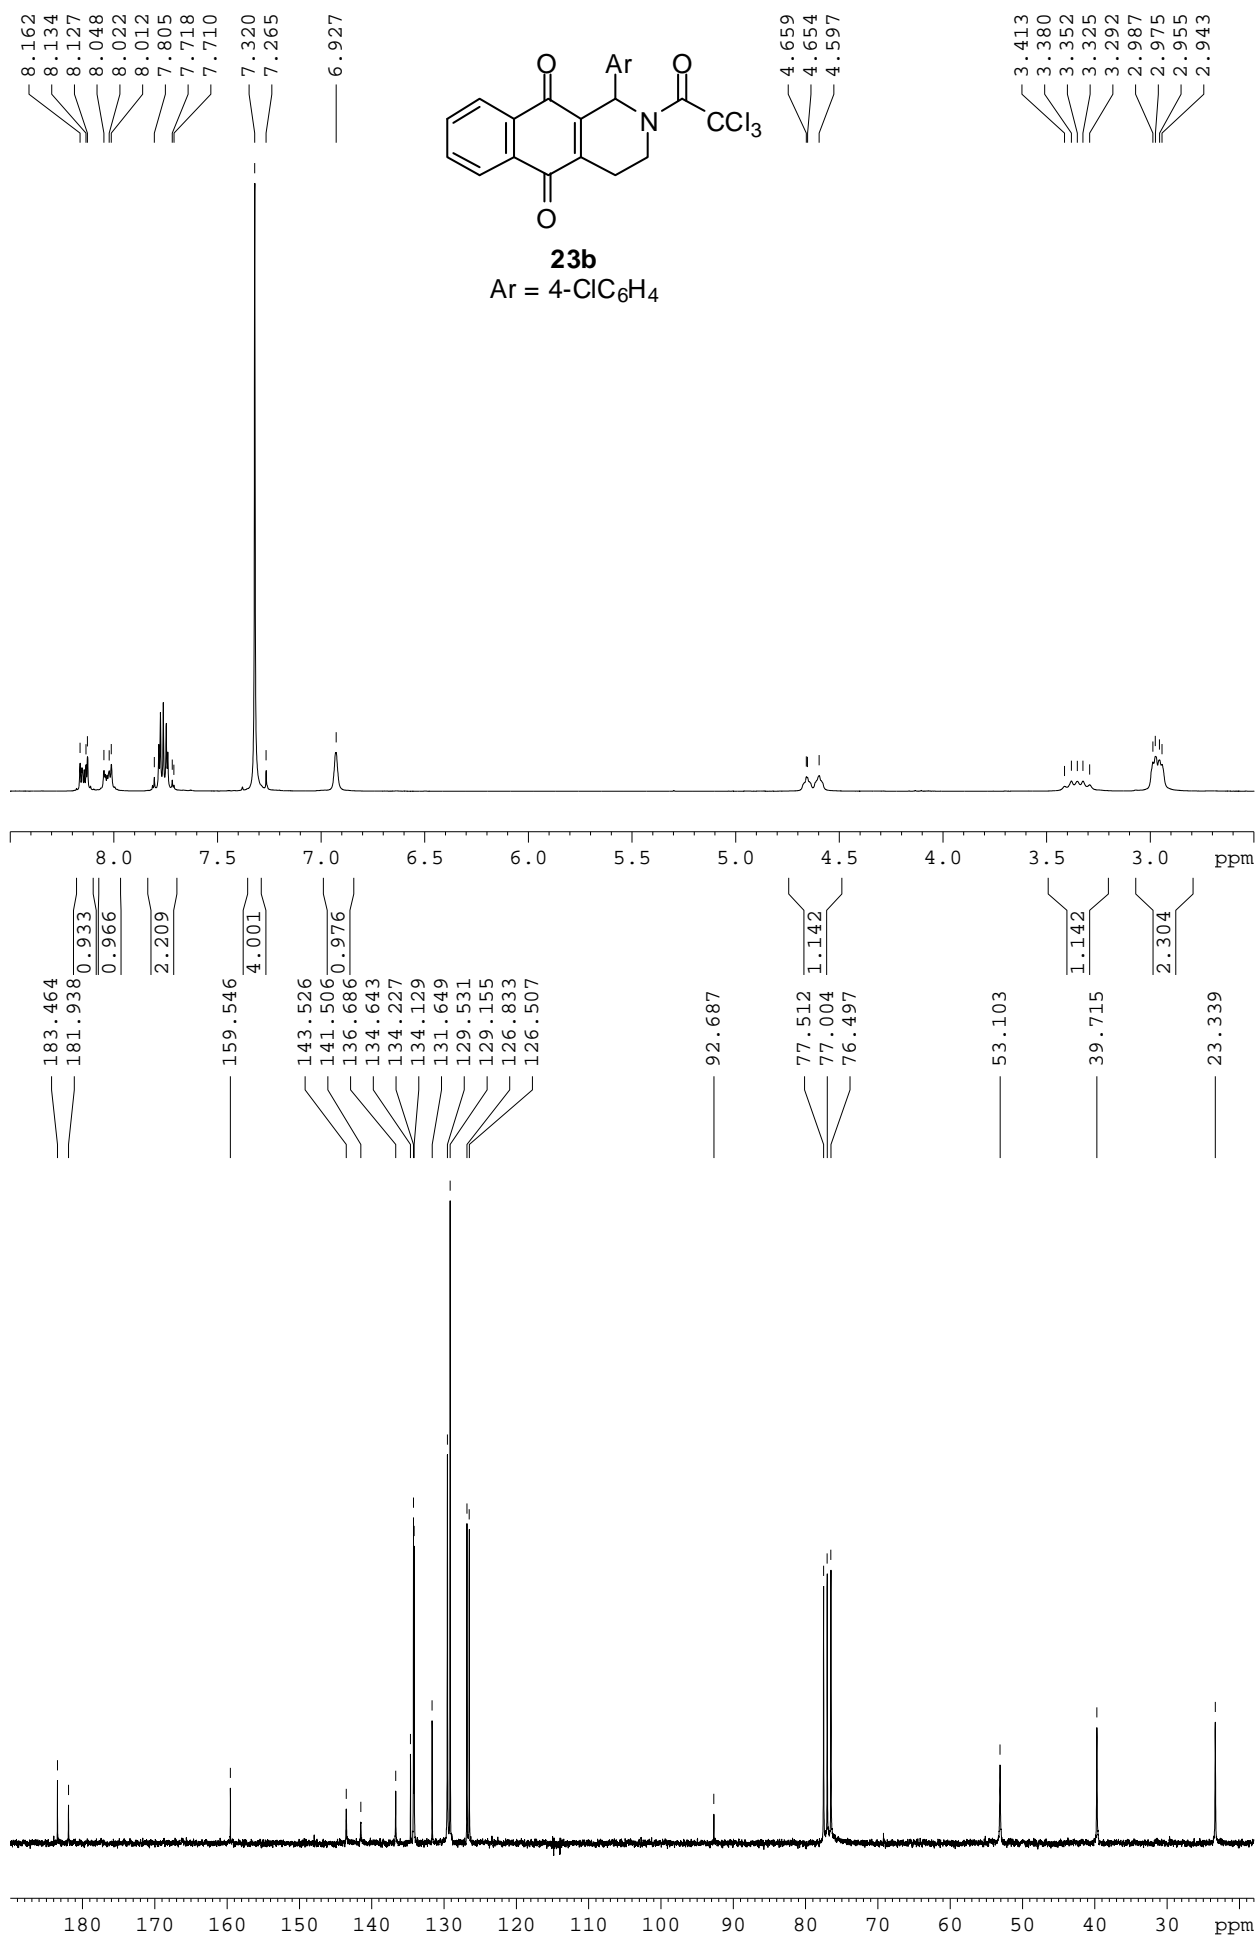

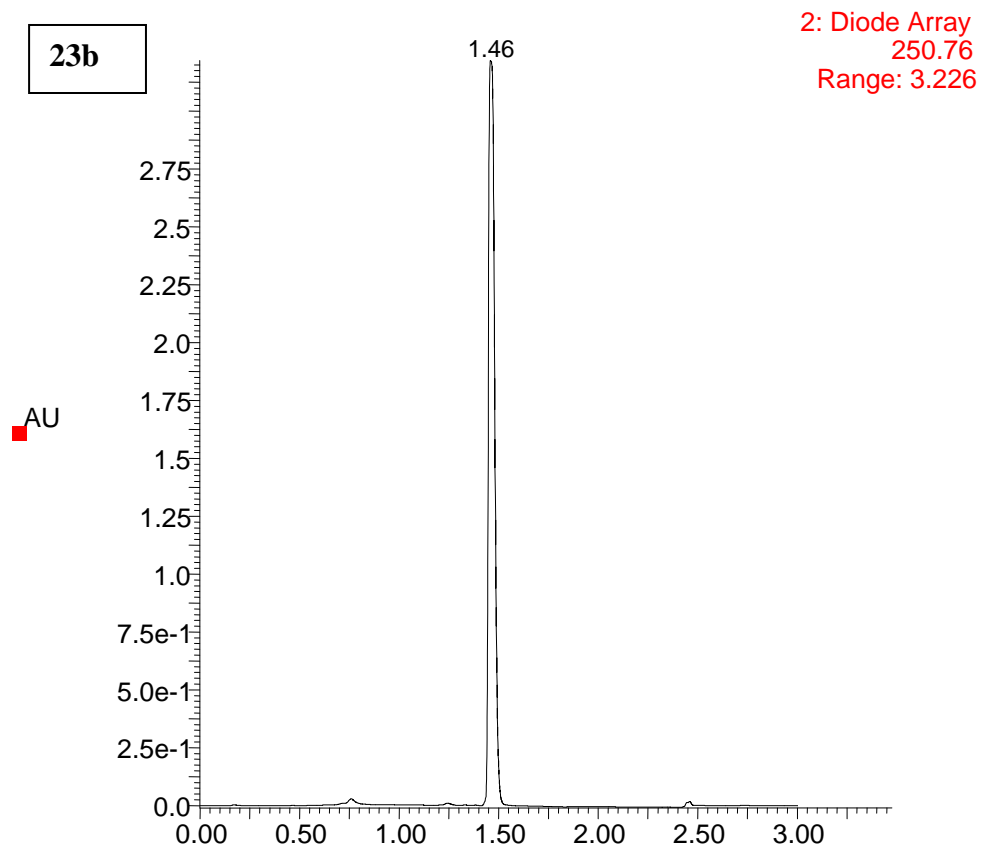

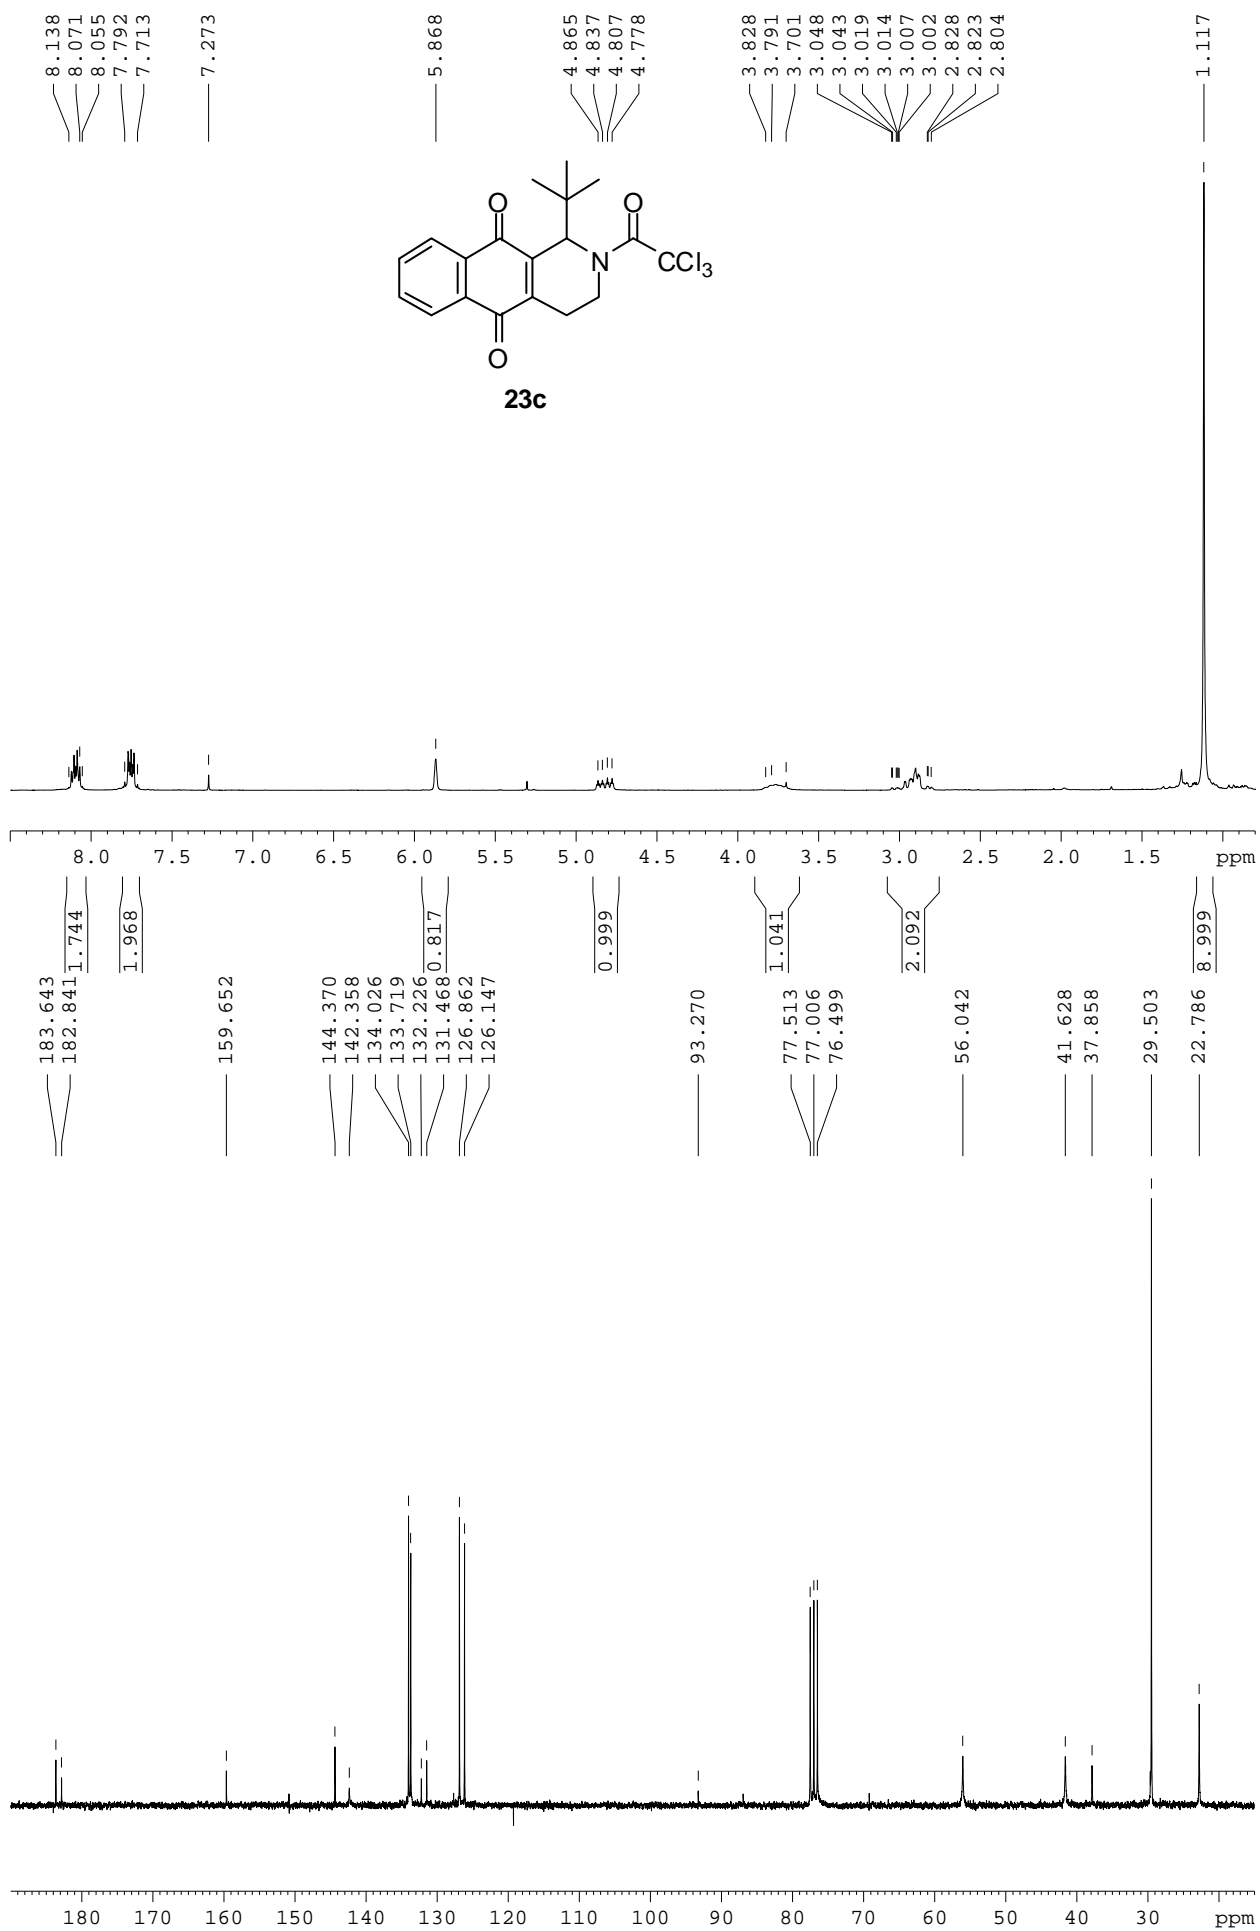

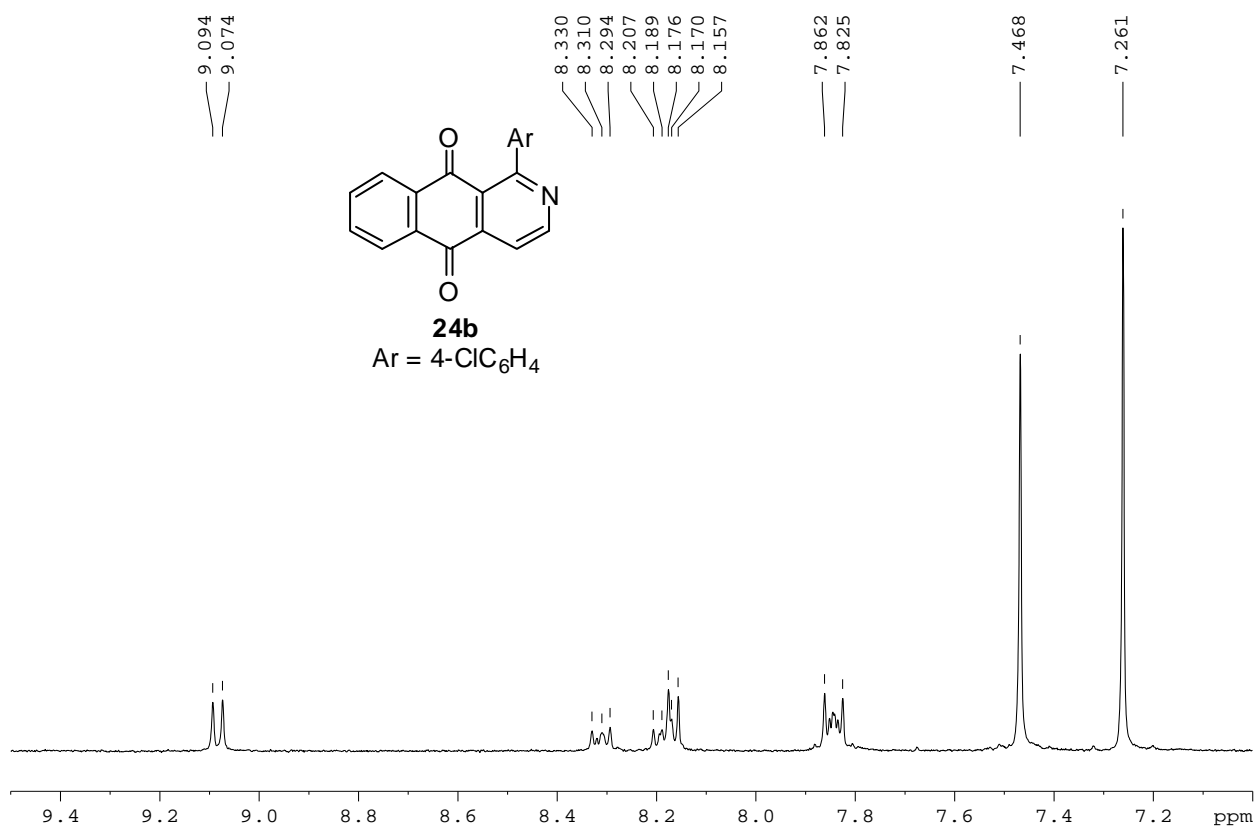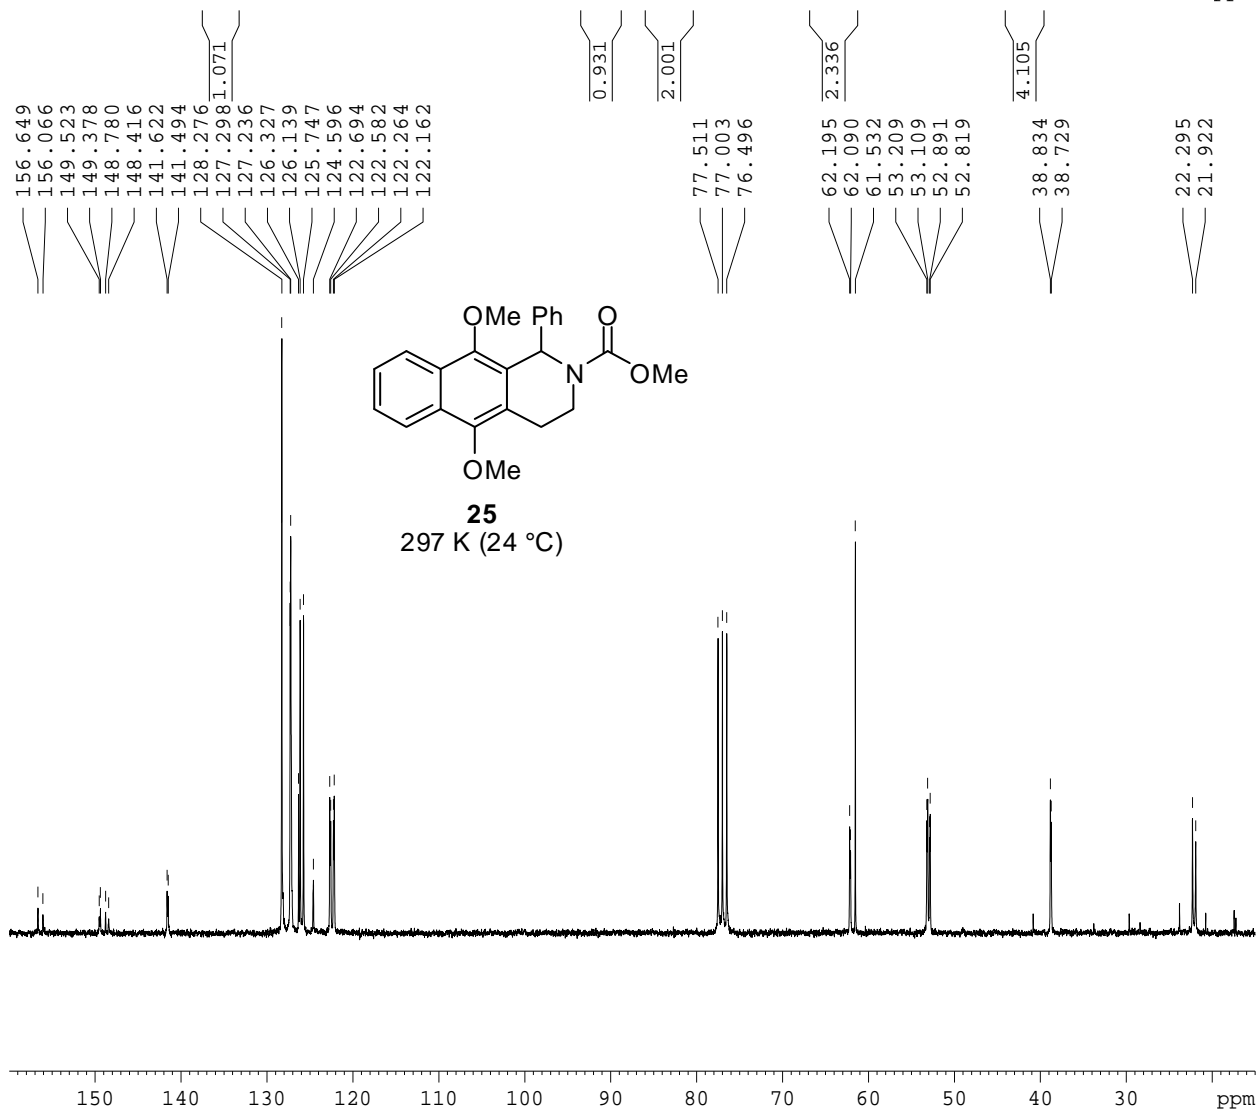

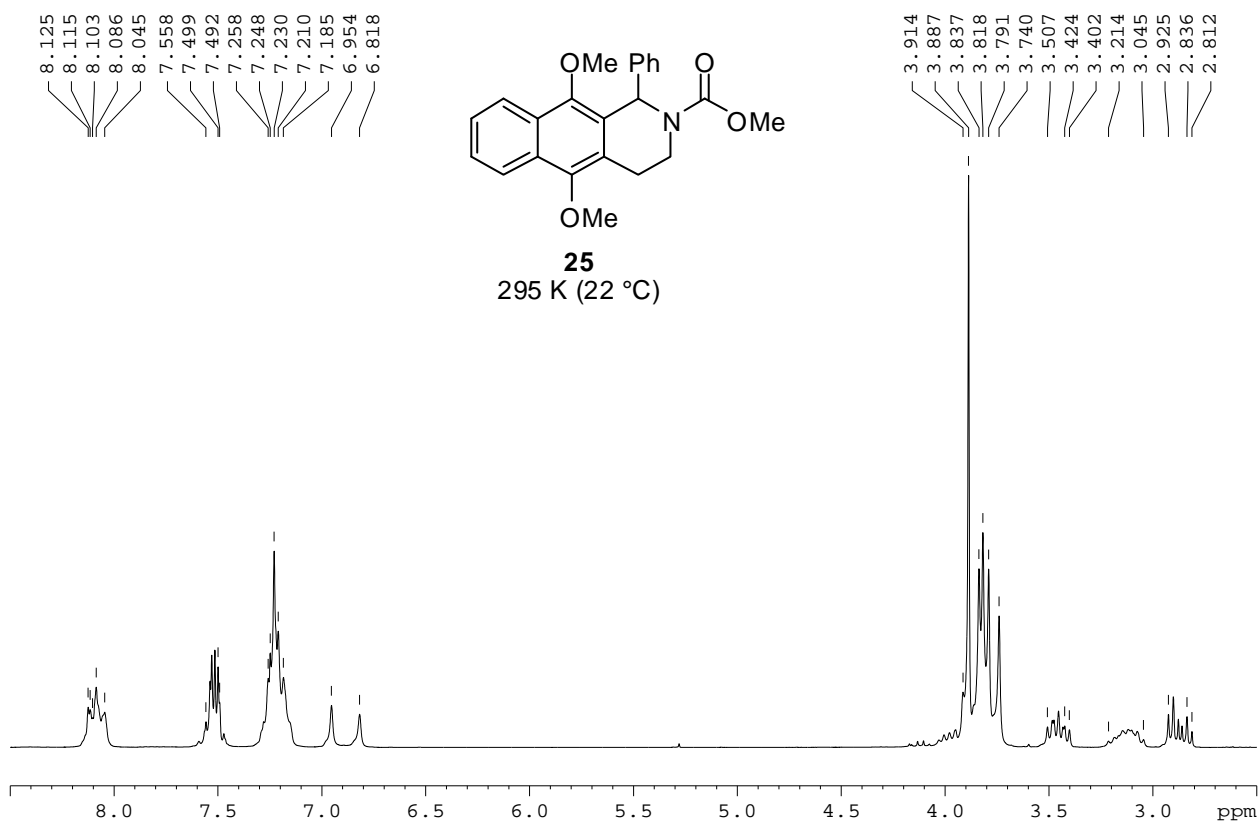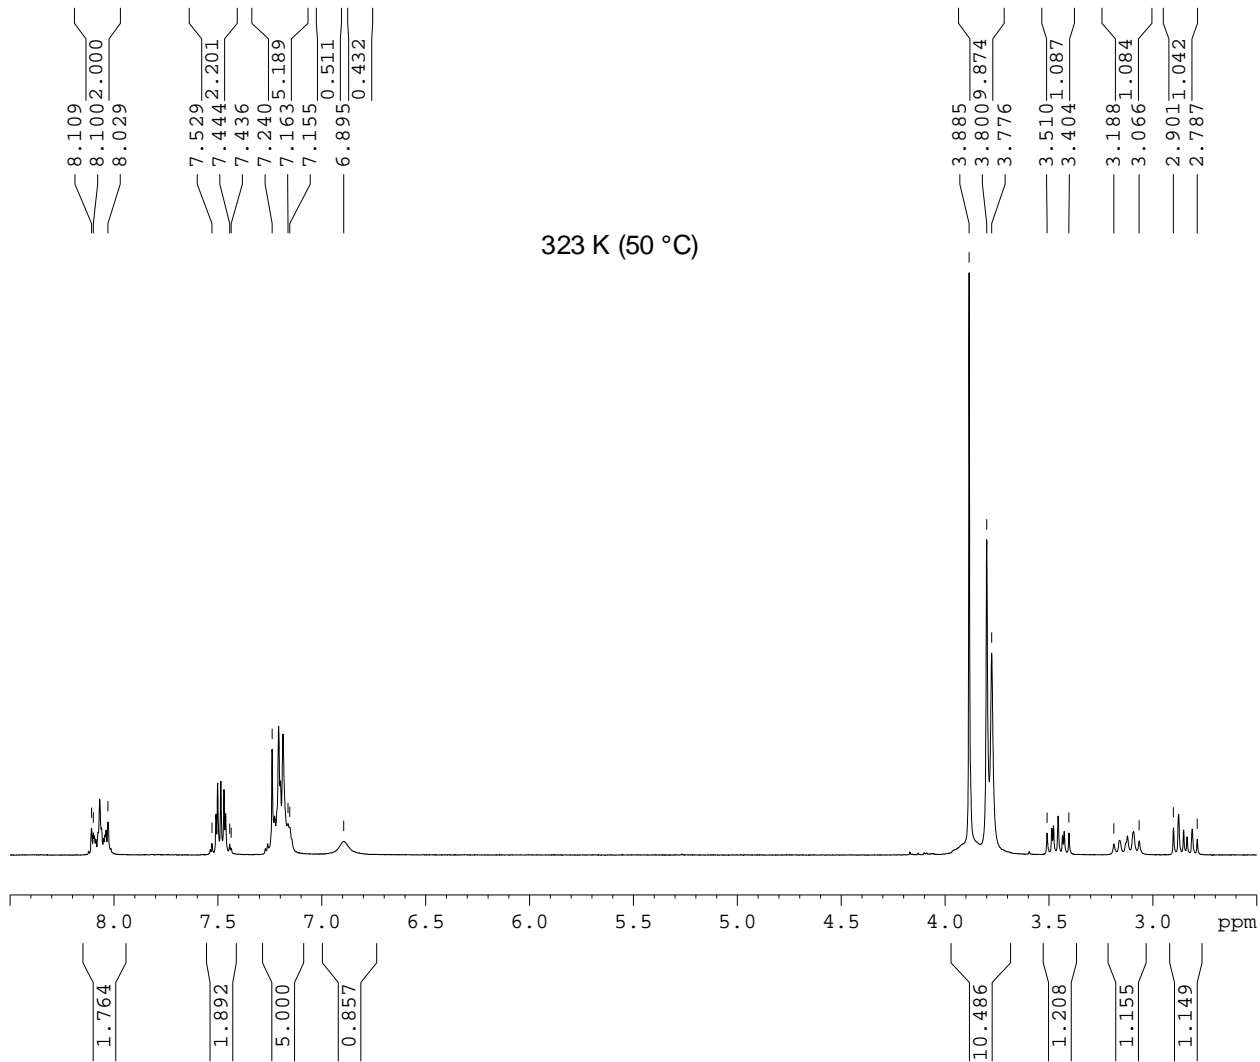



25

2: Diode Array  
236.76  
Range: 3.05

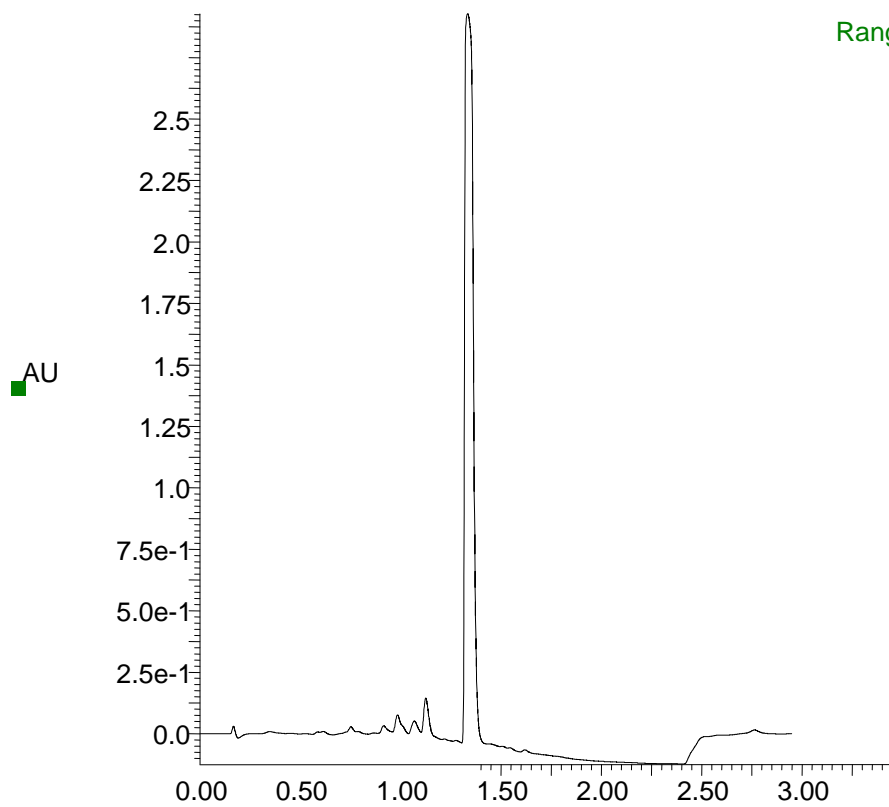

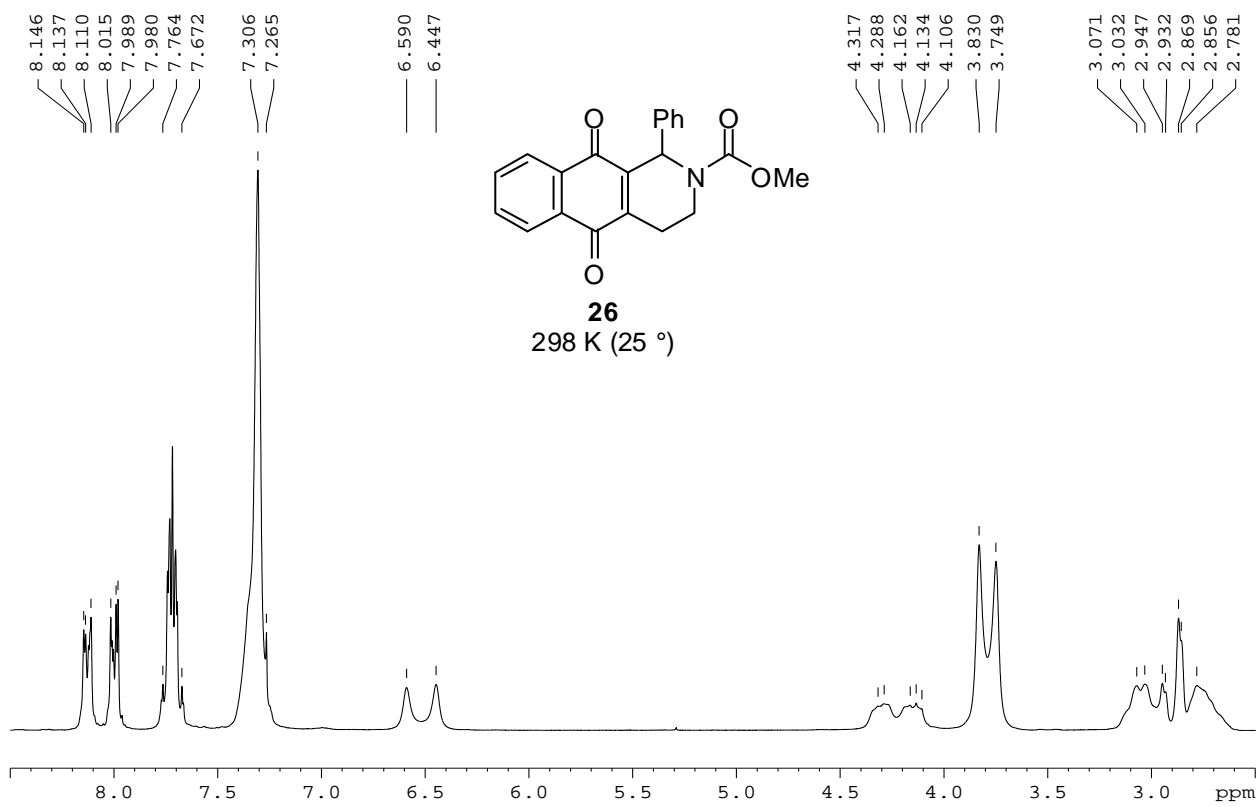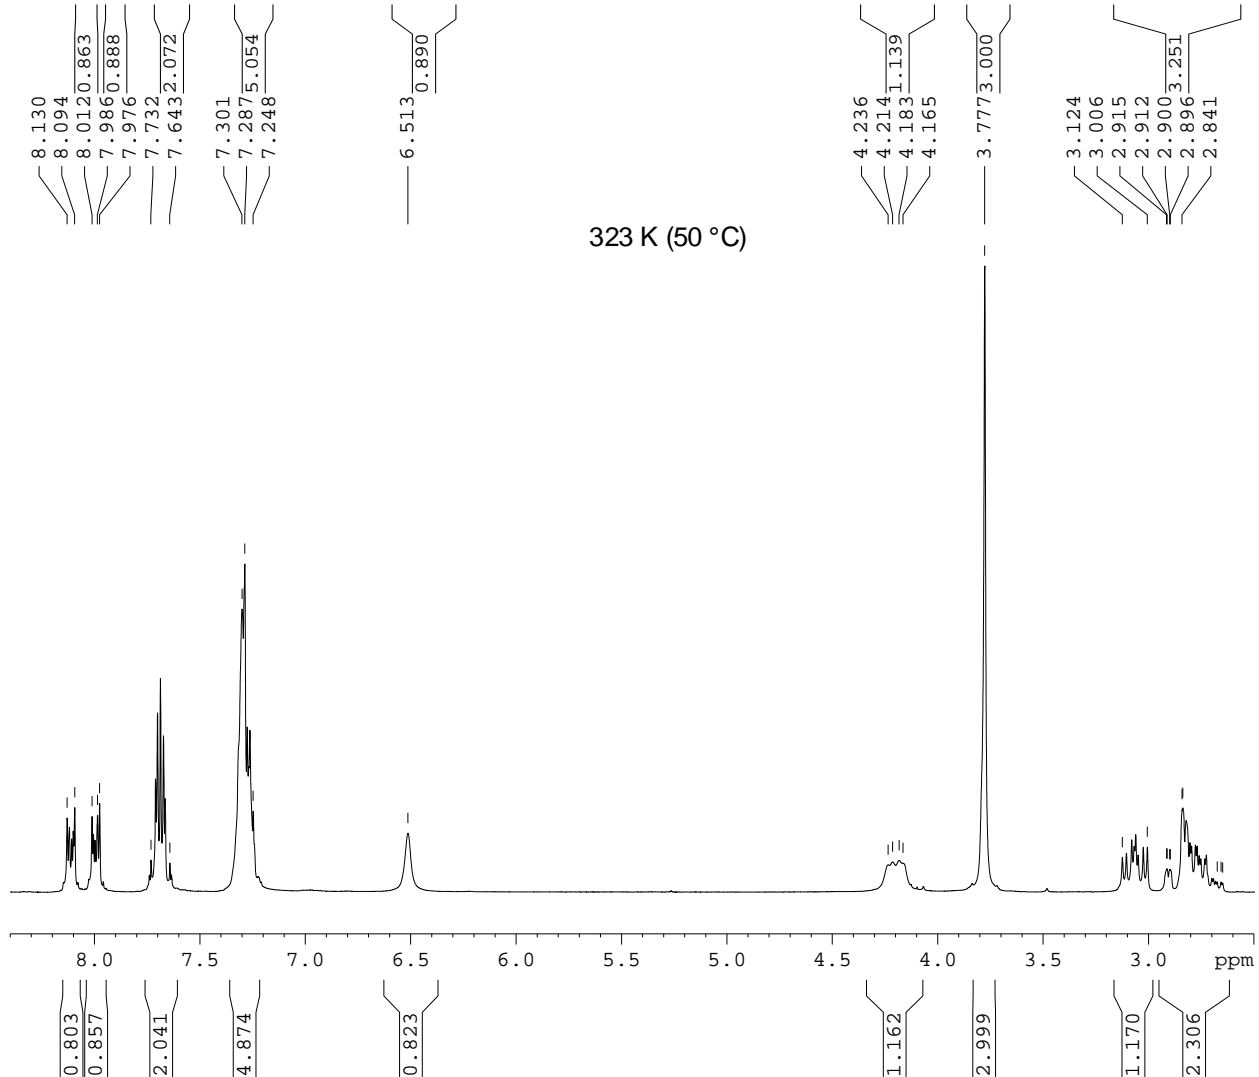

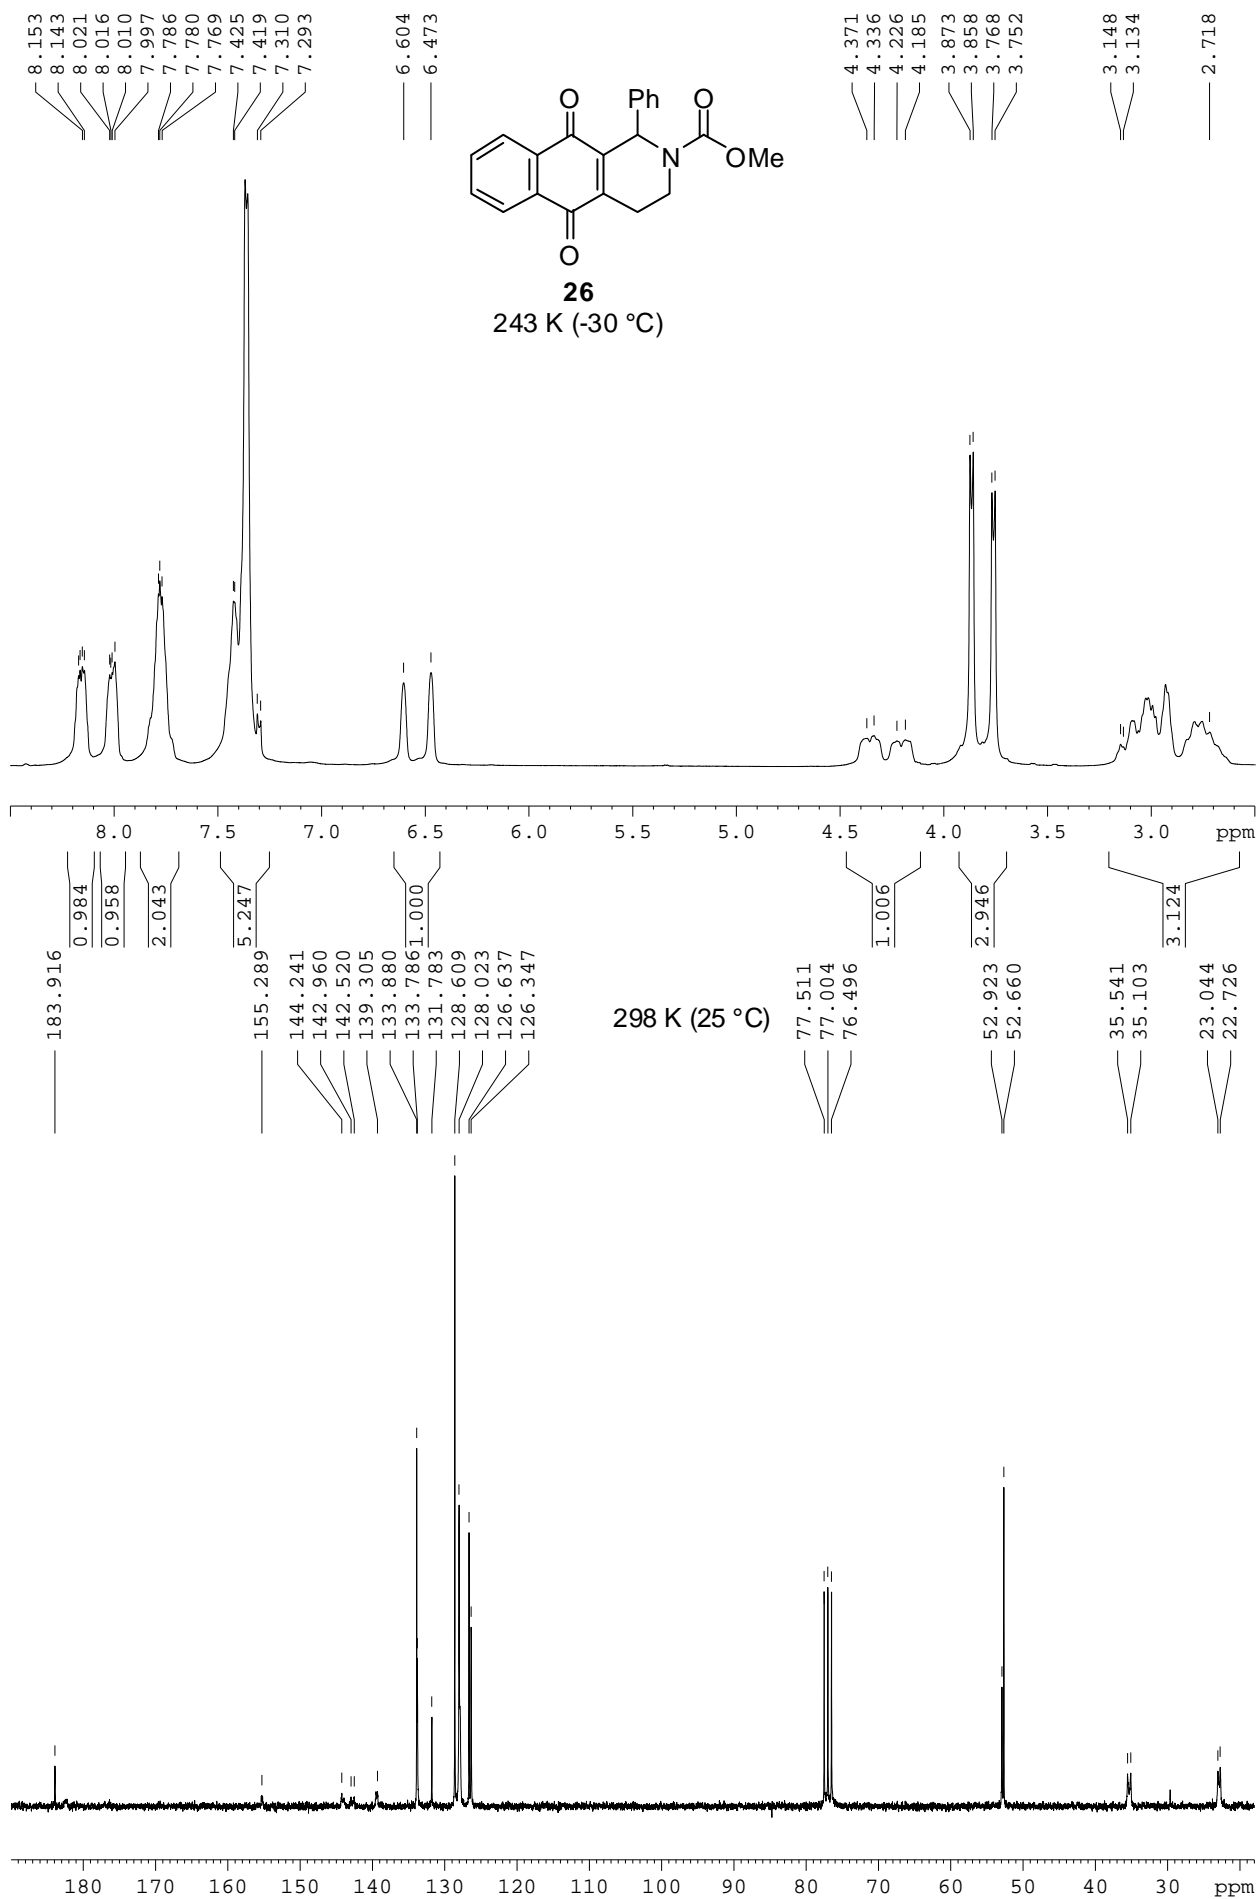

26

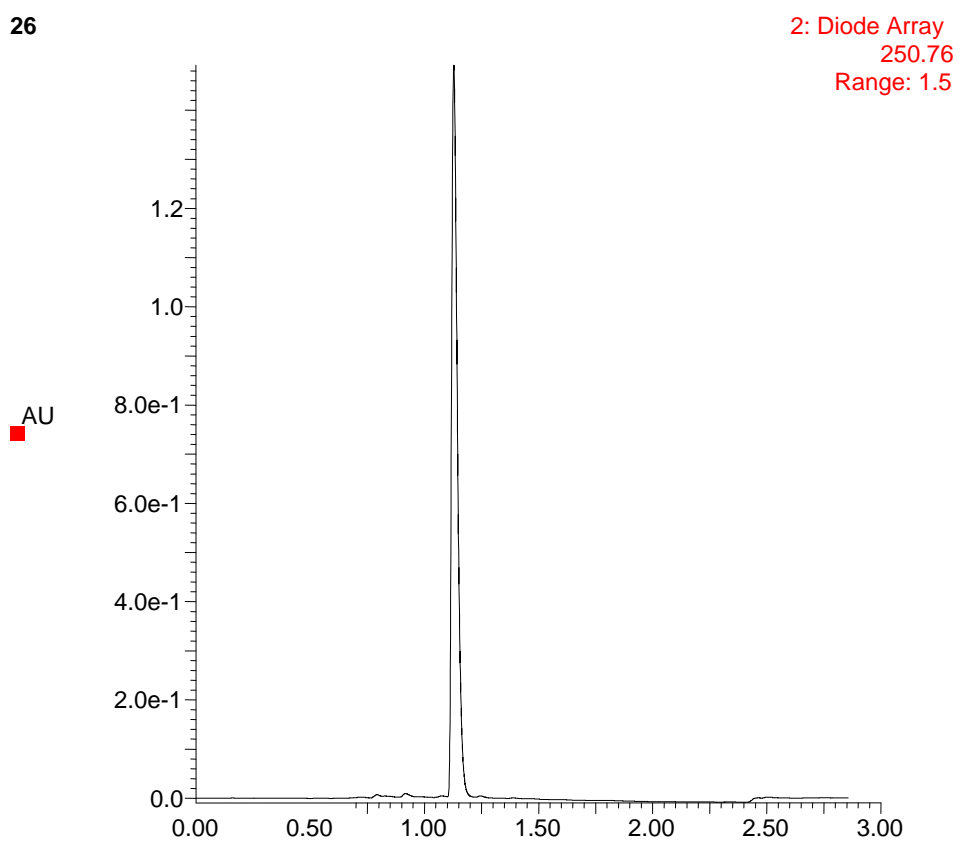

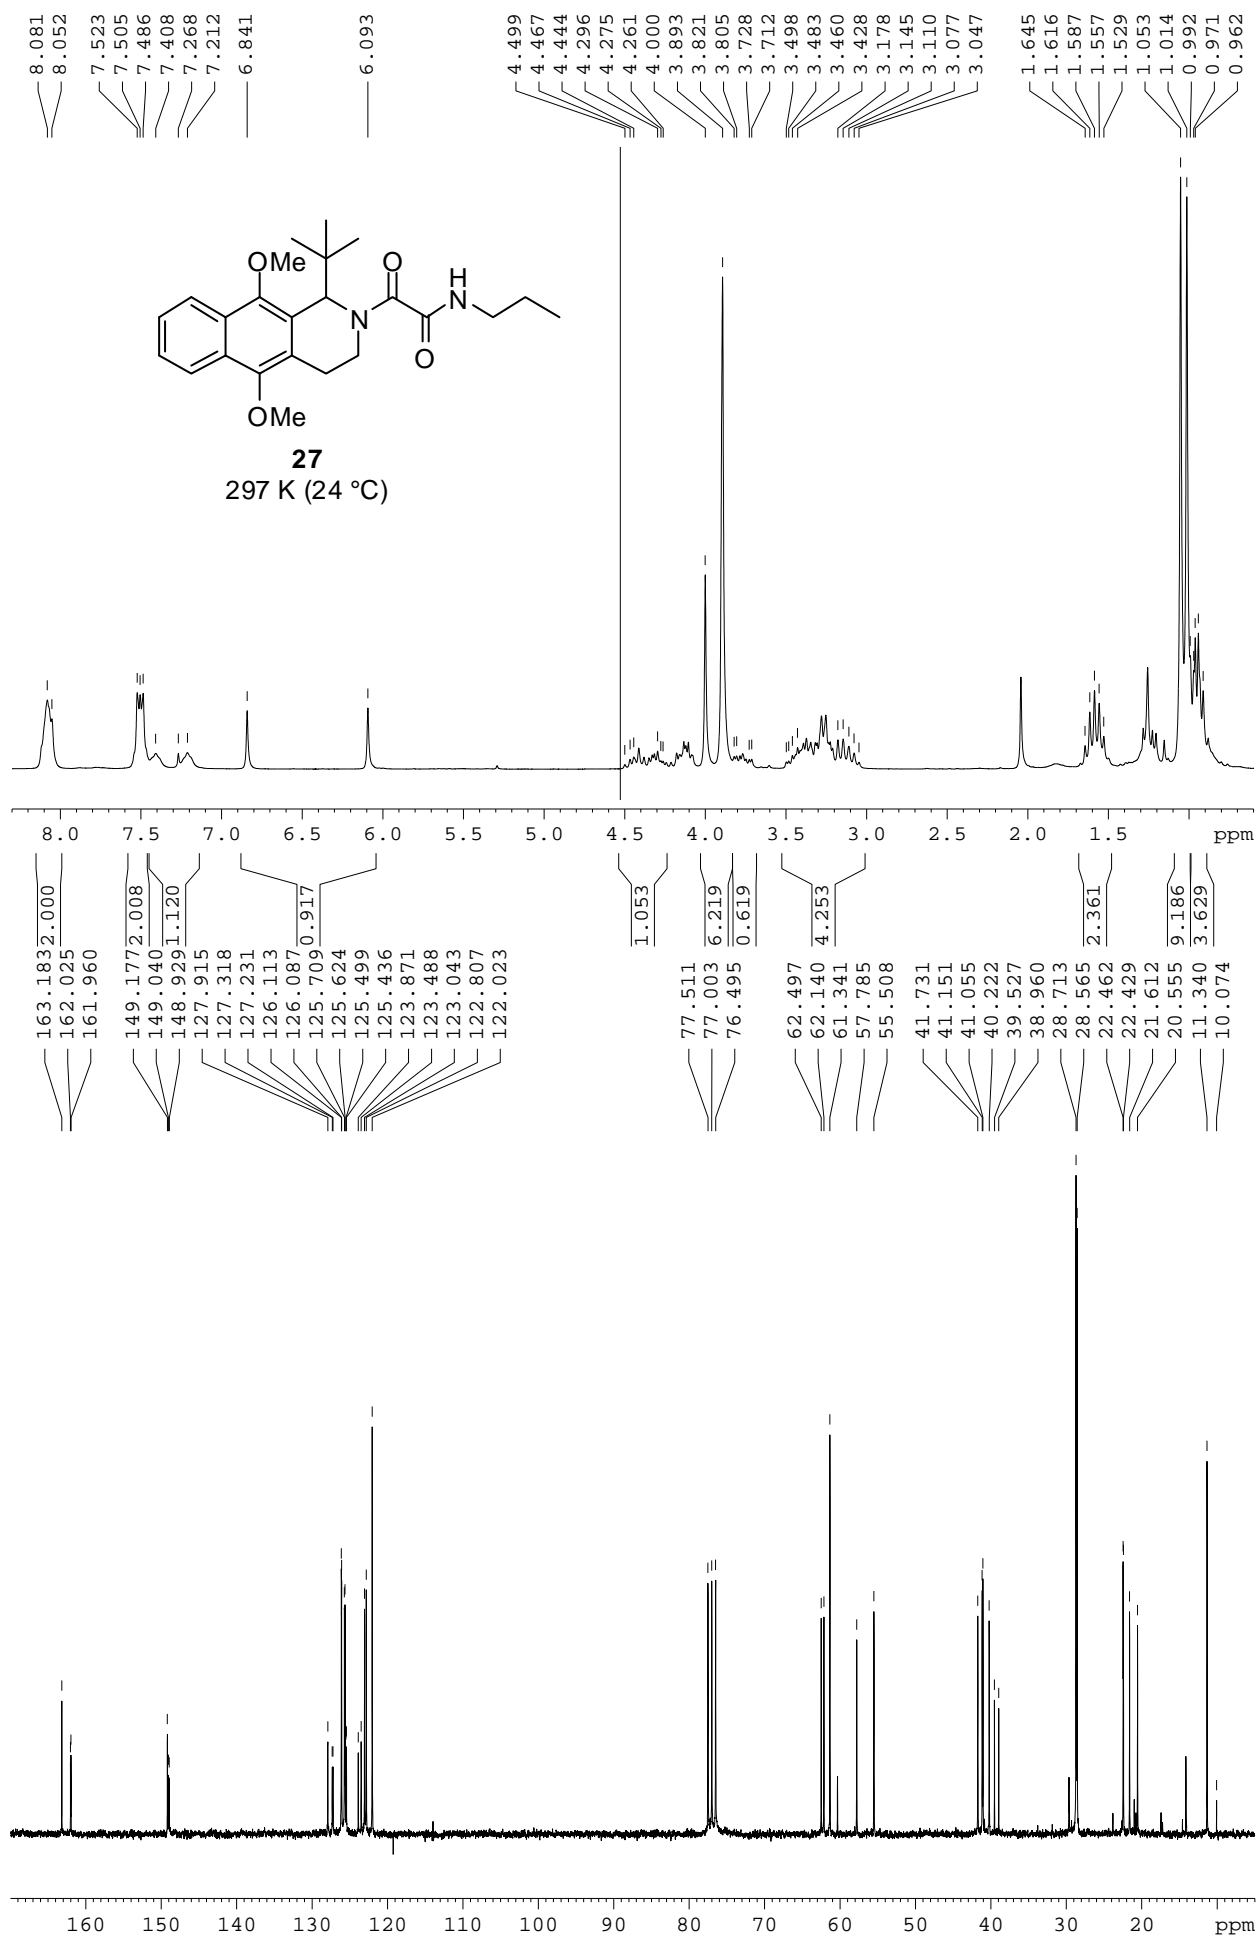

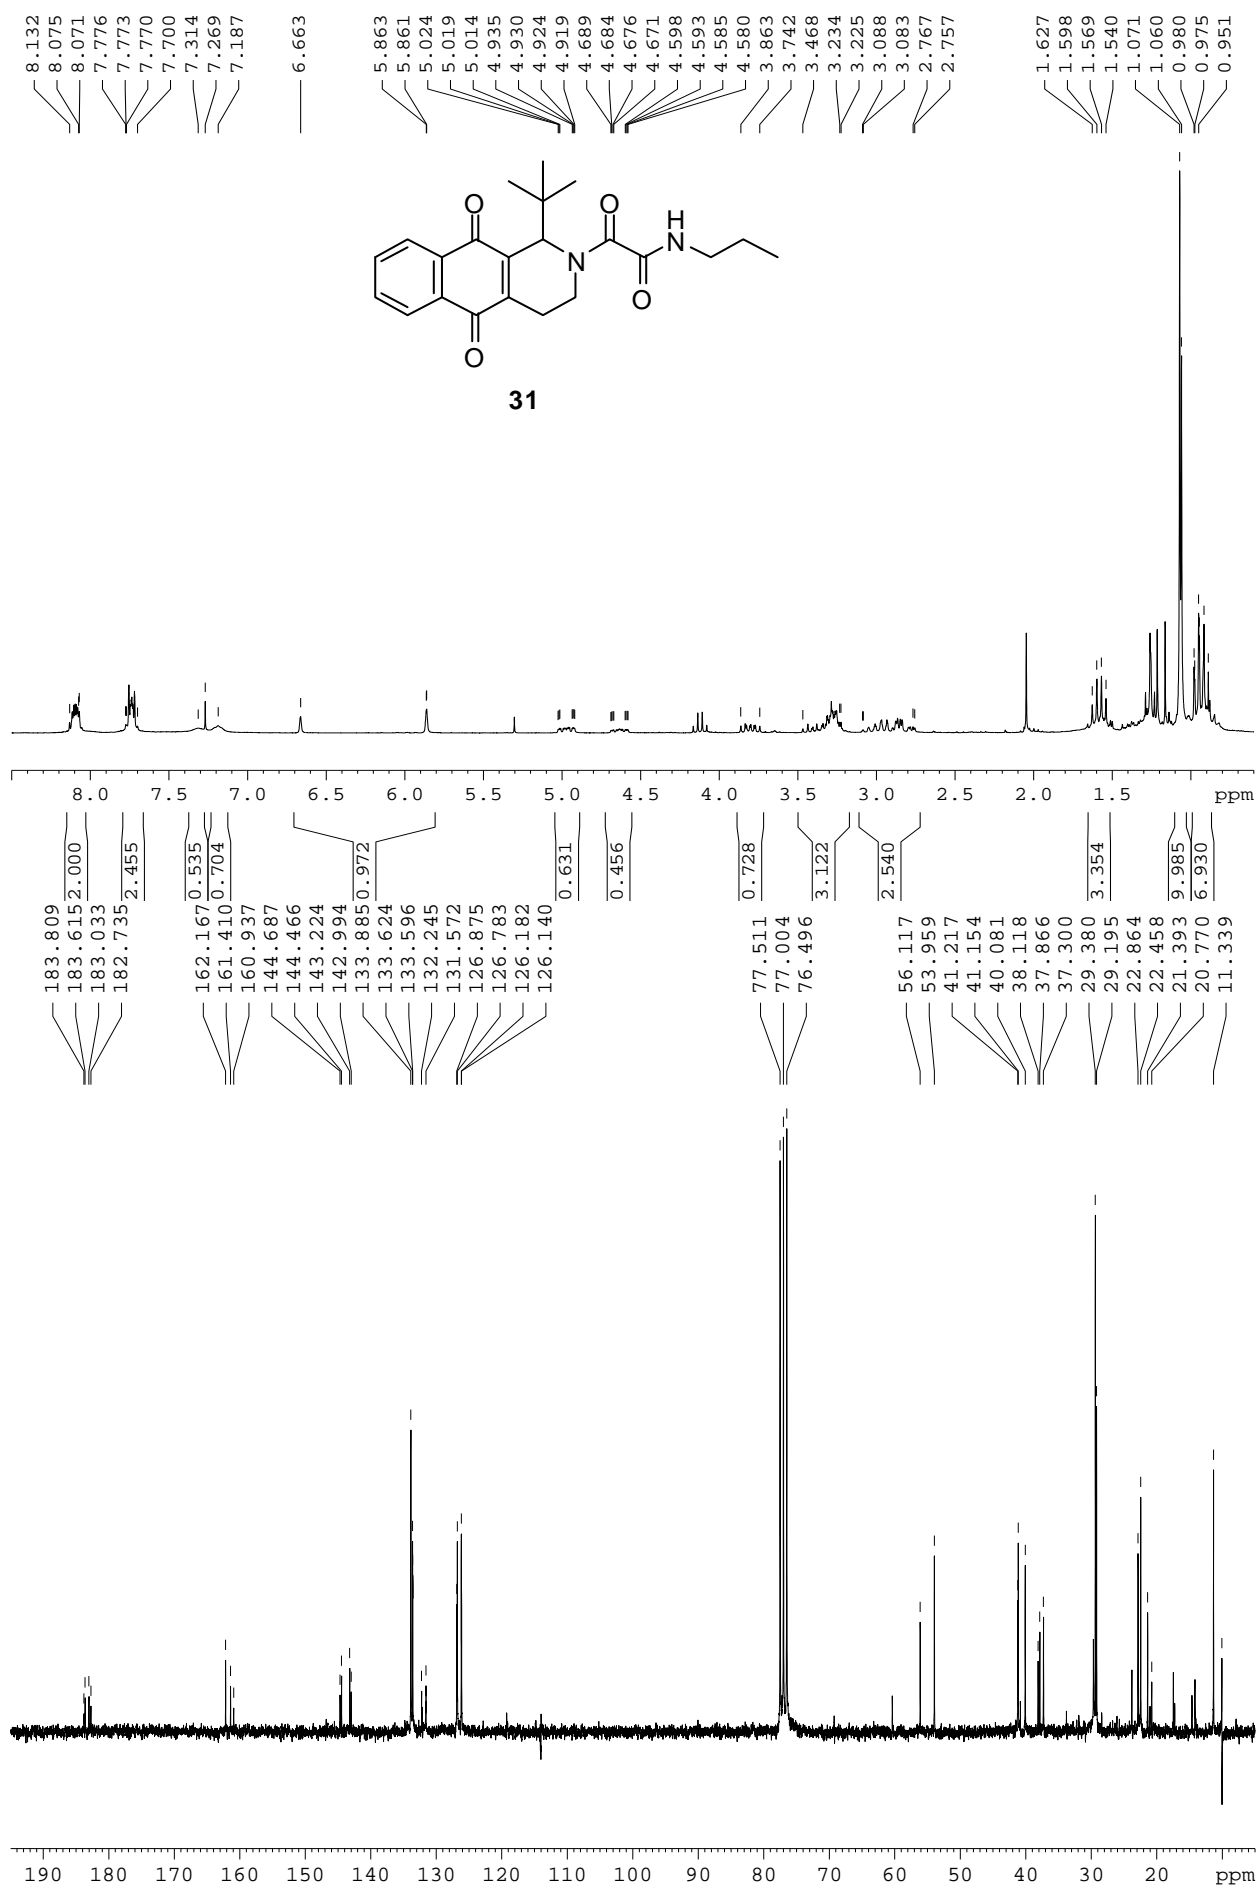

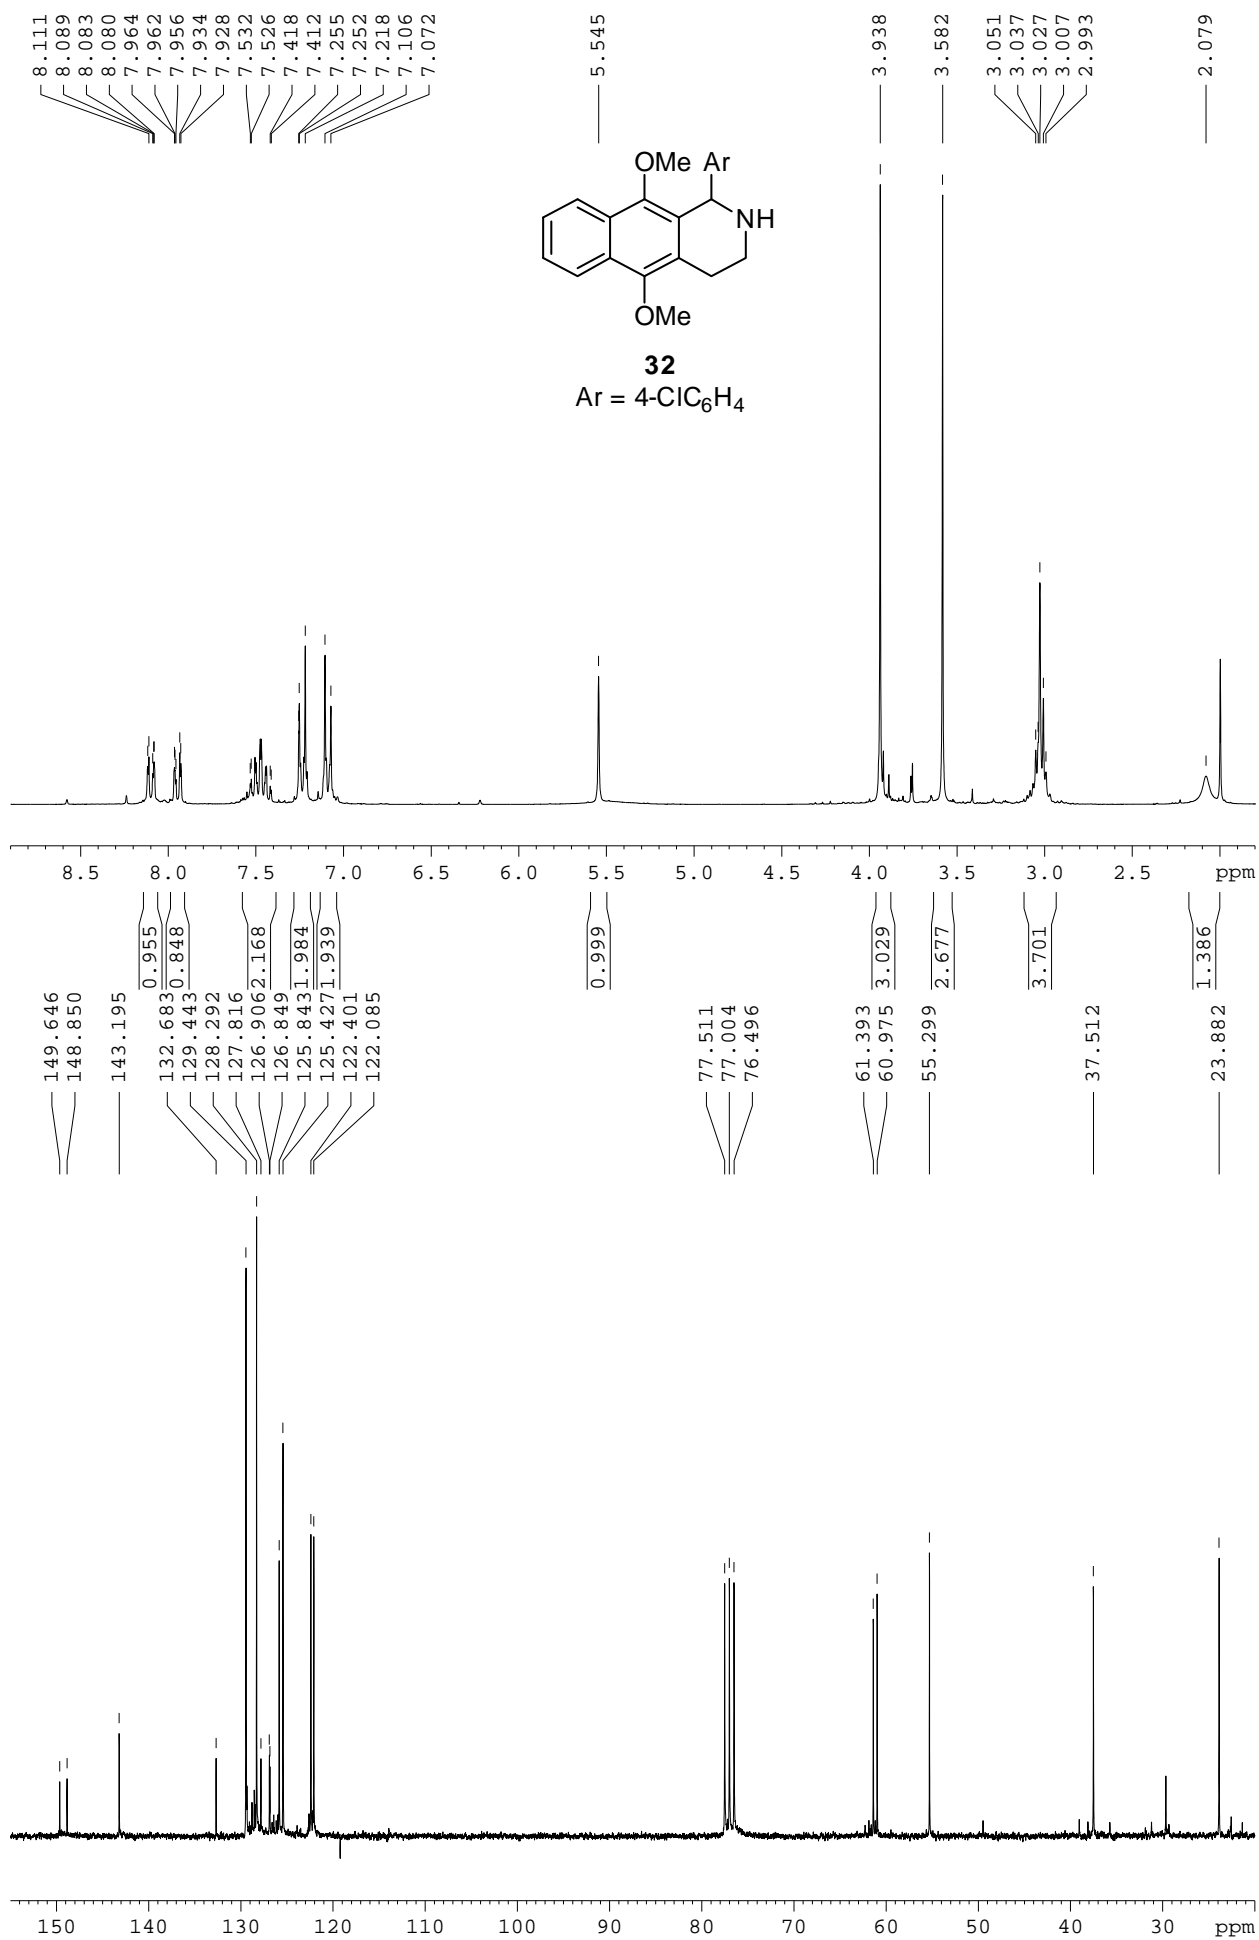

Supplement: c0ob00391c.pdf [file c0ob00391c.pdf]
